# Supplementary material
Source: MDPI journal article supplement (https://www.mdpi.com/2073-4395/12/2/505)
Supplement: s1 [file s1]

## Supplementary Figures

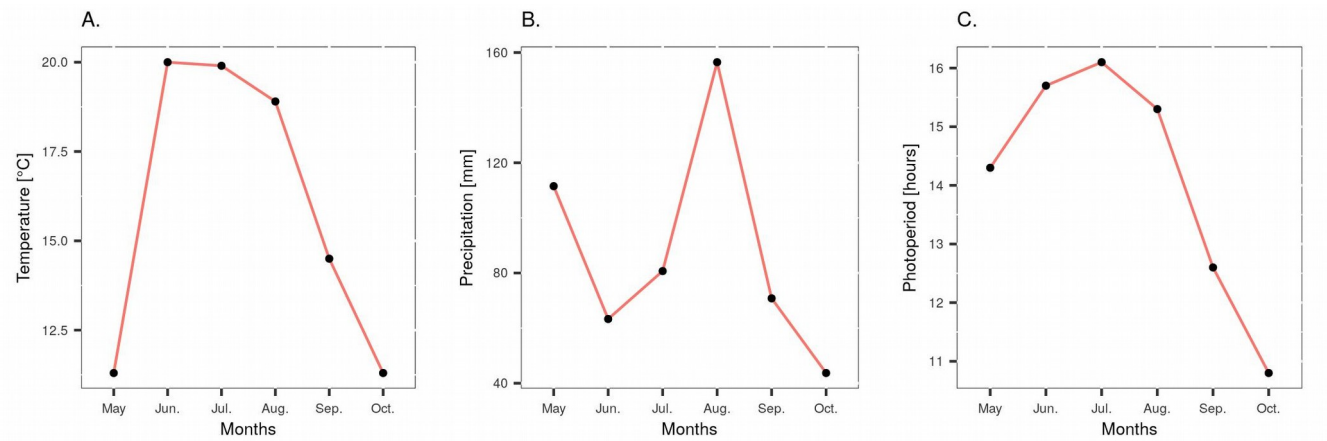

**Figure S1.** Monthly mean values of the three environmental variables belong to the experimental location Heidfeldhof between May – October 2019.

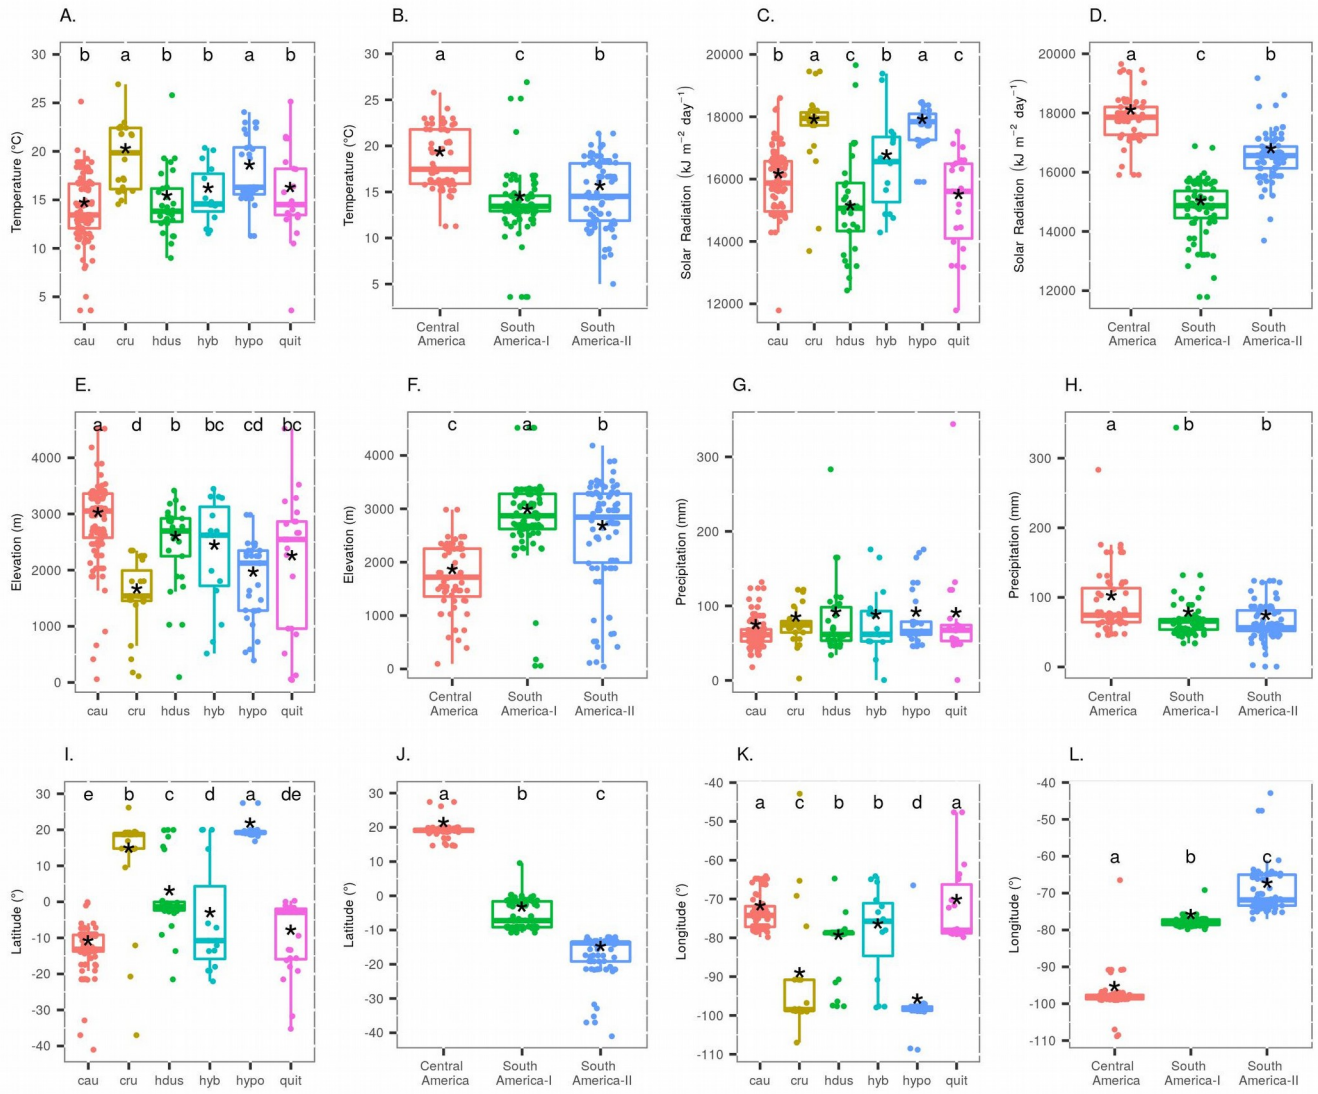

**Figure S2.** Box and bar plots of six environmental variables grouped by species and latitudinal groups, in each box and bar plot the respective groups were compared using a least significant difference (LSD) test and the groups with the different letters are significantly different at  $\alpha=0.05$ . No letters if there is no significant difference among the compared groups. Black asterisks (\*) indicate the mean values of each group in the box plots. Species are cau, *A. caudatus*; cru, *A. cruentus*; hdus, *A. hybridus*; hyb, the 'hybrid' group; hypo, *A. hypochondriacus* and quit, *A. quitensis*.

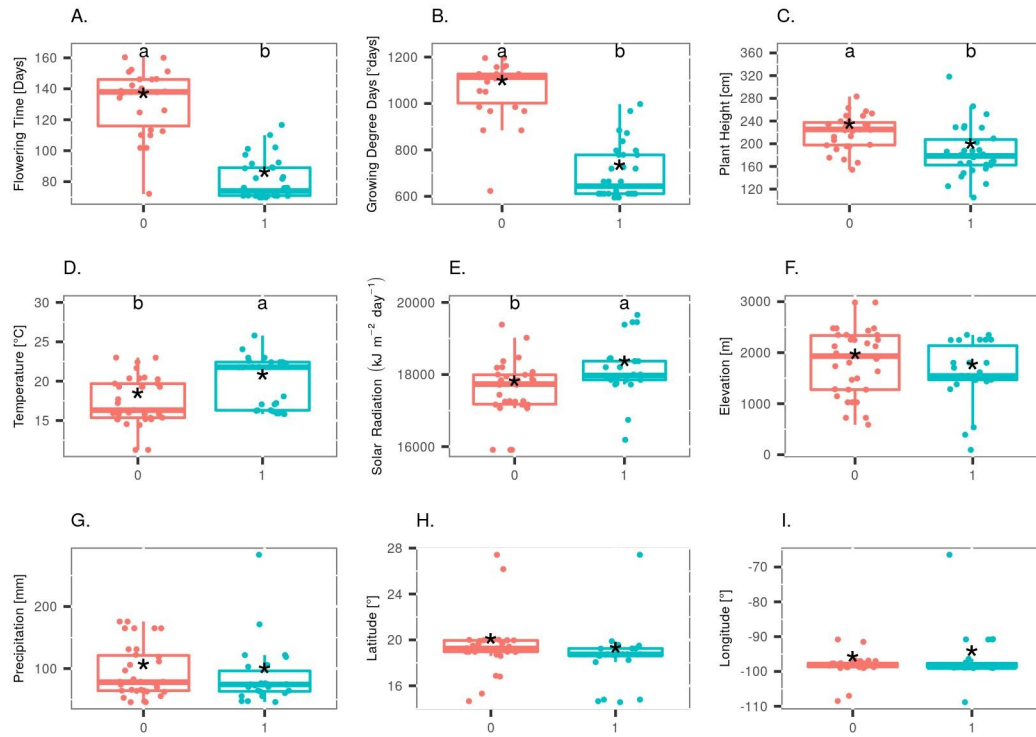

**Figure S3.** Box plots of three phenotypic traits and six environmental variables among the Central American accessions that were grouped by seed setting ‘1’ or no seed setting ‘0’. In each box plot the two groups were compared using a least significant difference (LSD) test and the groups with different letters are significantly different at alpha=0.05. No letters if there is no significant difference among the two groups. Black asterisk indicate the mean values of each group in the box plots.

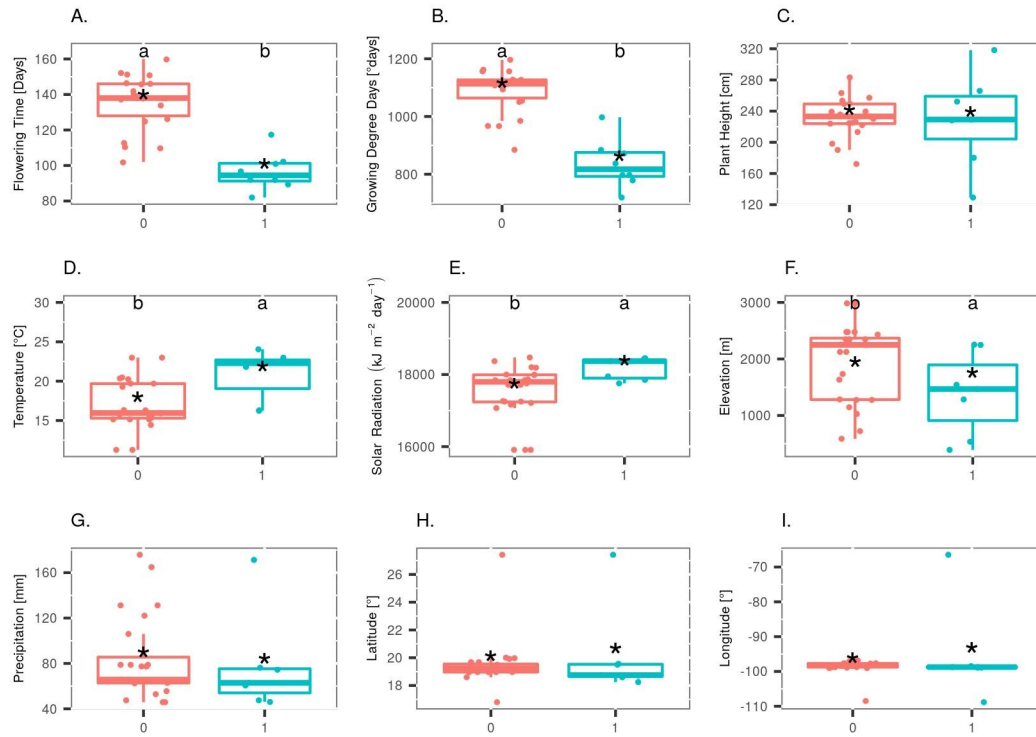

**Figure S4.** Box plots of three phenotypic traits and six environmental variables among the Central American *A. hypochondriacus* accessions that were grouped by seed setting '1' or no seed setting '0'. In each box plot the two groups were compared using a least significant difference (LSD) test and the groups with different letters are significantly different at alpha=0.05. No letters if there is no significant difference among the two groups. Black asterisk indicate the mean values of each group in the box plots.
