# Supplementary material
Source: MDPI journal article supplement (https://www.mdpi.com/2073-4395/12/2/505)
Supplement: s1 [file s1]

**Table S1.** List of the accessions

| No | Species            | Country   | Accession Number | Source   |
|----|--------------------|-----------|------------------|----------|
| 1  | <i>A. caudatus</i> | Peru      | PI 649242        | USDA ARS |
| 2  | <i>A. caudatus</i> | Peru      | PI 490565        | USDA ARS |
| 3  | <i>A. caudatus</i> | Peru      | PI 490445        | USDA ARS |
| 4  | <i>A. caudatus</i> | Peru      | PI 649227        | USDA ARS |
| 5  | <i>A. caudatus</i> | Peru      | PI 511686        | USDA ARS |
| 6  | <i>A. caudatus</i> | Peru      | PI 649222        | USDA ARS |
| 7  | <i>A. caudatus</i> | Peru      | PI 490552        | USDA ARS |
| 8  | <i>A. caudatus</i> | Peru      | PI 490551        | USDA ARS |
| 9  | <i>A. caudatus</i> | Peru      | PI 649240        | USDA ARS |
| 10 | <i>A. caudatus</i> | Bolivia   | PI 490459        | USDA ARS |
| 11 | <i>A. caudatus</i> | Peru      | PI 490519        | USDA ARS |
| 12 | <i>A. caudatus</i> | Peru      | PI 490562        | USDA ARS |
| 13 | <i>A. caudatus</i> | Peru      | PI 481960        | USDA ARS |
| 14 | <i>A. caudatus</i> | Peru      | PI 490559        | USDA ARS |
| 15 | <i>A. caudatus</i> | Peru      | PI 490538        | USDA ARS |
| 16 | <i>A. caudatus</i> | Bolivia   | PI 669838        | USDA ARS |
| 17 | <i>A. caudatus</i> | Peru      | PI 490536        | USDA ARS |
| 18 | <i>A. caudatus</i> | Peru      | PI 511687        | USDA ARS |
| 19 | <i>A. caudatus</i> | Bolivia   | Ames 15157       | USDA ARS |
| 20 | <i>A. caudatus</i> | Bolivia   | PI 490462        | USDA ARS |
| 21 | <i>A. caudatus</i> | Bolivia   | PI 642741        | USDA ARS |
| 22 | <i>A. caudatus</i> | Peru      | PI 490458        | USDA ARS |
| 23 | <i>A. caudatus</i> | Peru      | PI 490537        | USDA ARS |
| 24 | <i>A. caudatus</i> | Peru      | PI 490518        | USDA ARS |
| 25 | <i>A. caudatus</i> | Bolivia   | PI 490604        | USDA ARS |
| 26 | <i>A. caudatus</i> | Peru      | PI 490490        | USDA ARS |
| 27 | <i>A. caudatus</i> | Peru      | PI 481950        | USDA ARS |
| 28 | <i>A. caudatus</i> | Peru      | PI 649235        | USDA ARS |
| 29 | <i>A. caudatus</i> | Peru      | PI 649217        | USDA ARS |
| 30 | <i>A. caudatus</i> | Peru      | PI 490521        | USDA ARS |
| 31 | <i>A. caudatus</i> | Peru      | PI 490546        | USDA ARS |
| 32 | <i>A. caudatus</i> | Peru      | PI 490612        | USDA ARS |
| 33 | <i>A. caudatus</i> | Peru      | PI 490515        | USDA ARS |
| 34 | <i>A. caudatus</i> | Peru      | PI 511696        | USDA ARS |
| 35 | <i>A. caudatus</i> | Peru      | PI 490450        | USDA ARS |
| 36 | <i>A. caudatus</i> | Argentina | PI 511679        | USDA ARS |
| 37 | <i>A. caudatus</i> | Peru      | PI 490552        | USDA ARS |
| 38 | <i>A. caudatus</i> | Peru      | PI 511683        | USDA ARS |

|    |                    |           |            |          |
|----|--------------------|-----------|------------|----------|
| 39 | <i>A. caudatus</i> | Peru      | Ames 15155 | USDA ARS |
| 40 | <i>A. caudatus</i> | Peru      | PI 490569  | USDA ARS |
| 41 | <i>A. caudatus</i> | Peru      | PI 490547  | USDA ARS |
| 42 | <i>A. caudatus</i> | Peru      | Ames 15139 | USDA ARS |
| 43 | <i>A. caudatus</i> | Bolivia   | PI 478403  | USDA ARS |
| 44 | <i>A. caudatus</i> | Peru      | PI 490423  | USDA ARS |
| 45 | <i>A. caudatus</i> | Peru      | PI 490534  | USDA ARS |
| 46 | <i>A. caudatus</i> | Bolivia   | PI 490579  | USDA ARS |
| 47 | <i>A. caudatus</i> | Peru      | PI 490539  | USDA ARS |
| 48 | <i>A. caudatus</i> | Peru      | PI 511690  | USDA ARS |
| 49 | <i>A. caudatus</i> | Peru      | PI 511704  | USDA ARS |
| 50 | <i>A. caudatus</i> | Bolivia   | PI 511681  | USDA ARS |
| 51 | <i>A. caudatus</i> | Peru      | PI 490553  | USDA ARS |
| 52 | <i>A. caudatus</i> | Peru      | PI 649245  | USDA ARS |
| 53 | <i>A. caudatus</i> | Bolivia   | PI 490582  | USDA ARS |
| 54 | <i>A. caudatus</i> | Peru      | PI 490540  | USDA ARS |
| 55 | <i>A. caudatus</i> | Peru      | PI 490535  | USDA ARS |
| 56 | <i>A. caudatus</i> | Bolivia   | PI 490583  | USDA ARS |
| 57 | <i>A. caudatus</i> | Peru      | PI 649236  | USDA ARS |
| 58 | <i>A. caudatus</i> | Peru      | PI 511688  | USDA ARS |
| 59 | <i>A. caudatus</i> | Peru      | PI 511689  | USDA ARS |
| 60 | <i>A. caudatus</i> | Peru      | PI 490524  | USDA ARS |
| 61 | <i>A. caudatus</i> | Peru      | PI 649228  | USDA ARS |
| 62 | <i>A. caudatus</i> | Peru      | PI 511753  | USDA ARS |
| 63 | <i>A. caudatus</i> | Peru      | PI 649234  | USDA ARS |
| 64 | <i>A. caudatus</i> | Peru      | PI 511694  | USDA ARS |
| 65 | <i>A. caudatus</i> | Peru      | PI 490511  | USDA ARS |
| 66 | <i>A. caudatus</i> | Peru      | PI 481957  | USDA ARS |
| 67 | <i>A. caudatus</i> | Peru      | Ames 15141 | USDA ARS |
| 68 | <i>A. caudatus</i> | Peru      | PI 511695  | USDA ARS |
| 69 | <i>A. caudatus</i> | Peru      | PI 490558  | USDA ARS |
| 70 | <i>A. caudatus</i> | Ecuador   | PI 511712  | USDA ARS |
| 71 | <i>A. caudatus</i> | Peru      | PI 490431  | USDA ARS |
| 72 | <i>A. caudatus</i> | Peru      | PI 490549  | USDA ARS |
| 73 | <i>A. caudatus</i> | Peru      | PI 490573  | USDA ARS |
| 74 | <i>A. caudatus</i> | Peru      | PI 490439  | USDA ARS |
| 75 | <i>A. caudatus</i> | Peru      | PI 649230  | USDA ARS |
| 76 | <i>A. caudatus</i> | Peru      | PI 490555  | USDA ARS |
| 77 | <i>A. caudatus</i> | Peru      | PI 649219  | USDA ARS |
| 78 | <i>A. caudatus</i> | Bolivia   | PI 568137  | USDA ARS |
| 79 | <i>A. caudatus</i> | Argentina | Ames 15178 | USDA ARS |

|     |                    |           |            |          |
|-----|--------------------|-----------|------------|----------|
| 80  | <i>A. caudatus</i> | Bolivia   | PI 490456  | USDA ARS |
| 81  | <i>A. caudatus</i> | Bolivia   | PI 568150  | USDA ARS |
| 82  | <i>A. caudatus</i> | Peru      | PI 490526  | USDA ARS |
| 83  | <i>A. caudatus</i> | Peru      | PI 481970  | USDA ARS |
| 84  | <i>A. caudatus</i> | Bolivia   | PI 490580  | USDA ARS |
| 85  | <i>A. caudatus</i> | Peru      | PI 511706  | USDA ARS |
| 86  | <i>A. caudatus</i> | Peru      | PI 649220  | USDA ARS |
| 87  | <i>A. caudatus</i> | Peru      | PI 490486  | USDA ARS |
| 88  | <i>A. caudatus</i> | Bolivia   | PI 490606  | USDA ARS |
| 89  | <i>A. caudatus</i> | Bolivia   | Ames 15156 | USDA ARS |
| 90  | <i>A. caudatus</i> | Bolivia   | PI 608018  | USDA ARS |
| 91  | <i>A. caudatus</i> | Peru      | PI 649244  | USDA ARS |
| 92  | <i>A. caudatus</i> | Argentina | PI 511680  | USDA ARS |
| 93  | <i>A. caudatus</i> | Peru      | PI 481947  | USDA ARS |
| 94  | <i>A. caudatus</i> | Peru      | PI 481951  | USDA ARS |
| 95  | <i>A. caudatus</i> | Peru      | PI 490569  | USDA ARS |
| 96  | <i>A. caudatus</i> | Peru      | PI 490575  | USDA ARS |
| 97  | <i>A. caudatus</i> | Peru      | PI 481959  | USDA ARS |
| 98  | <i>A. caudatus</i> | Peru      | PI 649231  | USDA ARS |
| 99  | <i>A. caudatus</i> | Peru      | PI 511701  | USDA ARS |
| 100 | <i>A. caudatus</i> | Peru      | PI 481967  | USDA ARS |
| 101 | <i>A. caudatus</i> | Bolivia   | Ames 13860 | USDA ARS |
| 102 | <i>A. caudatus</i> | Peru      | Ames 5231  | USDA ARS |
| 103 | <i>A. caudatus</i> | Argentina | PI 490491  | USDA ARS |
| 104 | <i>A. caudatus</i> | Peru      | PI 511693  | USDA ARS |
| 105 | <i>A. caudatus</i> | Peru      | PI 649226  | USDA ARS |
| 106 | <i>A. caudatus</i> | Bolivia   | PI 490457  | USDA ARS |
| 107 | <i>A. caudatus</i> | Peru      | PI 490561  | USDA ARS |
| 108 | <i>A. caudatus</i> | Bolivia   | PI 490461  | USDA ARS |
| 109 | <i>A. caudatus</i> | Peru      | PI 649233  | USDA ARS |
| 110 | <i>A. caudatus</i> | Peru      | PI 490447  | USDA ARS |
| 111 | <i>A. caudatus</i> | Ecuador   | PI 608019  | USDA ARS |
| 112 | <i>A. caudatus</i> | Peru      | PI 649237  | USDA ARS |
| 113 | <i>A. caudatus</i> | Bolivia   | PI 568144  | USDA ARS |
| 114 | <i>A. caudatus</i> | Peru      | PI 490488  | USDA ARS |
| 115 | <i>A. caudatus</i> | Peru      | PI 490452  | USDA ARS |
| 116 | <i>A. cruentus</i> | Mexico    | PI 477913  | USDA ARS |
| 117 | <i>A. cruentus</i> | Peru      | PI 511713  | USDA ARS |
| 118 | <i>A. cruentus</i> | Mexico    | PI 576482  | USDA ARS |
| 119 | <i>A. cruentus</i> | Mexico    | PI 643037  | USDA ARS |
| 120 | <i>A. cruentus</i> | Mexico    | PI 477914  | USDA ARS |

|     |                    |           |             |            |
|-----|--------------------|-----------|-------------|------------|
| 121 | <i>A. cruentus</i> | Mexico    | PI 511723   | USDA ARS   |
| 122 | <i>A. cruentus</i> | Mexico    | PI 649509   | USDA ARS   |
| 123 | <i>A. cruentus</i> | Mexico    | PI 606798   | USDA ARS   |
| 124 | <i>A. cruentus</i> | Mexico    | PI 649514   | USDA ARS   |
| 125 | <i>A. cruentus</i> | Brazil    | PI 667165   | USDA ARS   |
| 126 | <i>A. cruentus</i> | Guatemala | PI 451826   | USDA ARS   |
| 127 | <i>A. cruentus</i> | Mexico    | Ames 5552   | USDA ARS   |
| 128 | <i>A. cruentus</i> | USA       | PI 606767   | USDA ARS   |
| 129 | <i>A. cruentus</i> | Mexico    | PI 511876   | USDA ARS   |
| 130 | <i>A. cruentus</i> | Venezuela | PI 665286   | USDA ARS   |
| 131 | <i>A. cruentus</i> | Argentina | PI 636182   | USDA ARS   |
| 132 | <i>A. cruentus</i> | Mexico    | PI 662284   | USDA ARS   |
| 133 | <i>A. cruentus</i> | Mexico    | PI 643058   | USDA ARS   |
| 134 | <i>A. cruentus</i> | USA       | PI 515959   | USDA ARS   |
| 135 | <i>A. cruentus</i> | Mexico    | PI 643039   | USDA ARS   |
| 136 | <i>A. cruentus</i> | Mexico    | PI 649524   | USDA ARS   |
| 137 | <i>A. cruentus</i> | Guatemala | PI 511717   | USDA ARS   |
| 138 | <i>A. cruentus</i> | Peru      | PI 511714   | USDA ARS   |
| 139 | <i>A. cruentus</i> | Mexico    | Ames 15191  | USDA ARS   |
| 140 | <i>A. cruentus</i> | USA       | PI 658731   | USDA ARS   |
| 141 | <i>A. cruentus</i> | Mexico    | PI 658728   | USDA ARS   |
| 142 | <i>A. cruentus</i> | Mexico    | PI 643042   | USDA ARS   |
| 143 | <i>A. cruentus</i> | Mexico    | PI 643063   | USDA ARS   |
| 144 | <i>A. cruentus</i> | Mexico    | PI 576481   | USDA ARS   |
| 145 | <i>A. cruentus</i> | Mexico    | PI 649609   | USDA ARS   |
| 146 | <i>A. cruentus</i> | Mexico    | Ames 2240   | USDA ARS   |
| 147 | <i>A. cruentus</i> | Guatemala | PI 433228   | USDA ARS   |
| 148 | <i>A. cruentus</i> | Mexico    | PI 643049   | USDA ARS   |
| 149 | <i>A. cruentus</i> | Germany   | Baernkrafft | Commercial |
| 150 | 'hybrid' group     | Peru      | PI 511684   | USDA ARS   |
| 151 | 'hybrid' group     | USA       | PI 568179   | USDA ARS   |
| 152 | 'hybrid' group     | Mexico    | PI 604564   | USDA ARS   |
| 153 | 'hybrid' group     | Peru      | PI 490430   | USDA ARS   |
| 154 | 'hybrid' group     | Peru      | PI 490453   | USDA ARS   |
| 155 | 'hybrid' group     | Bolivia   | PI 490586   | USDA ARS   |
| 156 | 'hybrid' group     | Peru      | PI 490424   | USDA ARS   |
| 157 | 'hybrid' group     | Mexico    | PI 604566   | USDA ARS   |
| 158 | 'hybrid' group     | Peru      | PI 511752   | USDA ARS   |
| 159 | 'hybrid' group     | Mexico    | PI 604571   | USDA ARS   |
| 160 | 'hybrid' group     | Guatemala | Ames 21996  | USDA ARS   |
| 161 | 'hybrid' group     | Peru      | PI 490449   | USDA ARS   |

|     |                           |           |            |          |
|-----|---------------------------|-----------|------------|----------|
| 162 | 'hybrid' group            | Peru      | PI 490441  | USDA ARS |
| 163 | 'hybrid' group            | Bolivia   | PI 511734  | USDA ARS |
| 164 | 'hybrid' group            | Bolivia   | PI 511735  | USDA ARS |
| 165 | 'hybrid' group            | Peru      | PI 511733  | USDA ARS |
| 166 | <i>A. hybridus</i>        | Ecuador   | PI 490681  | USDA ARS |
| 167 | <i>A. hybridus</i>        | Ecuador   | PI 490689  | USDA ARS |
| 168 | <i>A. hybridus</i>        | Peru      | Ames 5232  | USDA ARS |
| 169 | <i>A. hybridus</i>        | Peru      | PI 490740  | USDA ARS |
| 170 | <i>A. hybridus</i>        | Ecuador   | PI 490716  | USDA ARS |
| 171 | <i>A. hybridus</i>        | Ecuador   | PI 490682  | USDA ARS |
| 172 | <i>A. hybridus</i>        | Ecuador   | PI 490731  | USDA ARS |
| 173 | <i>A. hybridus</i>        | Ecuador   | PI 490739  | USDA ARS |
| 174 | <i>A. hybridus</i>        | Ecuador   | PI 490684  | USDA ARS |
| 175 | <i>A. hybridus</i>        | Ecuador   | PI 490715  | USDA ARS |
| 176 | <i>A. hybridus</i>        | Ecuador   | PI 490676  | USDA ARS |
| 177 | <i>A. hybridus</i>        | Guatemala | PI 667158  | USDA ARS |
| 178 | <i>A. hybridus</i>        | Mexico    | PI 604574  | USDA ARS |
| 179 | <i>A. hybridus</i>        | Ecuador   | PI 490664  | USDA ARS |
| 180 | <i>A. hybridus</i>        | Ecuador   | PI 490685  | USDA ARS |
| 181 | <i>A. hybridus</i>        | Peru      | PI 490489  | USDA ARS |
| 182 | <i>A. hybridus</i>        | Ecuador   | PI 490722  | USDA ARS |
| 183 | <i>A. hybridus</i>        | Mexico    | PI 511724  | USDA ARS |
| 184 | <i>A. hybridus</i>        | Ecuador   | PI 490679  | USDA ARS |
| 185 | <i>A. hybridus</i>        | Ecuador   | PI 490670  | USDA ARS |
| 186 | <i>A. hybridus</i>        | Ecuador   | PI 667156  | USDA ARS |
| 187 | <i>A. hybridus</i>        | Ecuador   | PI 490703  | USDA ARS |
| 188 | <i>A. hybridus</i>        | Ecuador   | PI 490721  | USDA ARS |
| 189 | <i>A. hybridus</i>        | Ecuador   | PI 511754  | USDA ARS |
| 190 | <i>A. hybridus</i>        | Ecuador   | PI 490678  | USDA ARS |
| 191 | <i>A. hybridus</i>        | Mexico    | PI 604568  | USDA ARS |
| 192 | <i>A. hybridus</i>        | Guatemala | Ames 22001 | USDA ARS |
| 193 | <i>A. hybridus</i>        | Ecuador   | PI 490677  | USDA ARS |
| 194 | <i>A. hybridus</i>        | Bolivia   | Ames 5335  | USDA ARS |
| 195 | <i>A. hybridus</i>        | Mexico    | PI 604582  | USDA ARS |
| 196 | <i>A. hybridus</i>        | Ecuador   | PI 490680  | USDA ARS |
| 197 | <i>A. hypochondriacus</i> | Mexico    | PI 604595  | USDA ARS |
| 198 | <i>A. hypochondriacus</i> | Mexico    | PI 649607  | USDA ARS |
| 199 | <i>A. hypochondriacus</i> | Mexico    | PI 649623  | USDA ARS |
| 200 | <i>A. hypochondriacus</i> | Mexico    | PI 649565  | USDA ARS |
| 201 | <i>A. hypochondriacus</i> | Mexico    | PI 643070  | USDA ARS |
| 202 | <i>A. hypochondriacus</i> | Mexico    | PI 649633  | USDA ARS |

|     |                           |             |           |          |
|-----|---------------------------|-------------|-----------|----------|
| 203 | <i>A. hypochondriacus</i> | Mexico      | PI 649529 | USDA ARS |
| 204 | <i>A. hypochondriacus</i> | Mexico      | PI 643041 | USDA ARS |
| 205 | <i>A. hypochondriacus</i> | Mexico      | PI 477916 | USDA ARS |
| 206 | <i>A. hypochondriacus</i> | Chile       | Ames 5355 | USDA ARS |
| 207 | <i>A. hypochondriacus</i> | USA         | PI 568127 | USDA ARS |
| 208 | <i>A. hypochondriacus</i> | Mexico      | PI 649537 | USDA ARS |
| 209 | <i>A. hypochondriacus</i> | Mexico      | PI 643067 | USDA ARS |
| 210 | <i>A. hypochondriacus</i> | Mexico      | PI 649532 | USDA ARS |
| 211 | <i>A. hypochondriacus</i> | Mexico      | Ames 2215 | USDA ARS |
| 212 | <i>A. hypochondriacus</i> | Mexico      | PI 649559 | USDA ARS |
| 213 | <i>A. hypochondriacus</i> | Mexico      | PI 649575 | USDA ARS |
| 214 | <i>A. hypochondriacus</i> | Mexico      | PI 649595 | USDA ARS |
| 215 | <i>A. hypochondriacus</i> | Puerto Rico | Ames 5149 | USDA ARS |
| 216 | <i>A. hypochondriacus</i> | Mexico      | PI 633589 | USDA ARS |
| 217 | <i>A. hypochondriacus</i> | Mexico      | Ames 5457 | USDA ARS |
| 218 | <i>A. hypochondriacus</i> | Mexico      | PI 649544 | USDA ARS |
| 219 | <i>A. hypochondriacus</i> | Mexico      | PI 604587 | USDA ARS |
| 220 | <i>A. hypochondriacus</i> | Mexico      | PI 643036 | USDA ARS |
| 221 | <i>A. hypochondriacus</i> | Mexico      | PI 619247 | USDA ARS |
| 222 | <i>A. hypochondriacus</i> | Brazil      | Ames 5690 | USDA ARS |
| 223 | <i>A. hypochondriacus</i> | Mexico      | PI 649602 | USDA ARS |
| 224 | <i>A. hypochondriacus</i> | Mexico      | PI 649535 | USDA ARS |
| 225 | <i>A. hypochondriacus</i> | Mexico      | Ames 2085 | USDA ARS |
| 226 | <i>A. hypochondriacus</i> | Mexico      | PI 649602 | USDA ARS |
| 227 | <i>A. hypochondriacus</i> | Mexico      | PI 643074 | USDA ARS |
| 228 | <i>A. hypochondriacus</i> | Mexico      | PI 604559 | USDA ARS |
| 229 | <i>A. hypochondriacus</i> | Mexico      | PI 604581 | USDA ARS |
| 230 | <i>A. hypochondriacus</i> | Mexico      | PI 649587 | USDA ARS |
| 231 | <i>A. hypochondriacus</i> | Mexico      | PI 511731 | USDA ARS |
| 232 | <i>A. quitensis</i>       | Ecuador     | PI 511747 | USDA ARS |
| 233 | <i>A. quitensis</i>       | Brazil      | PI 652428 | USDA ARS |
| 234 | <i>A. quitensis</i>       | Ecuador     | PI 490720 | USDA ARS |
| 235 | <i>A. quitensis</i>       | Ecuador     | PI 490673 | USDA ARS |
| 236 | <i>A. quitensis</i>       | Peru        | PI 490466 | USDA ARS |
| 237 | <i>A. quitensis</i>       | Ecuador     | PI 511737 | USDA ARS |
| 238 | <i>A. quitensis</i>       | Ecuador     | PI 511739 | USDA ARS |
| 239 | <i>A. quitensis</i>       | Brazil      | PI 652422 | USDA ARS |
| 240 | <i>A. quitensis</i>       | Ecuador     | PI 490705 | USDA ARS |
| 241 | <i>A. quitensis</i>       | Peru        | PI 649246 | USDA ARS |
| 242 | <i>A. quitensis</i>       | Ecuador     | PI 511745 | USDA ARS |
| 243 | <i>A. quitensis</i>       | Bolivia     | PI 511736 | USDA ARS |

|     |                     |           |            |          |
|-----|---------------------|-----------|------------|----------|
| 244 | <i>A. quitensis</i> | Peru      | Ames 5342  | USDA ARS |
| 245 | <i>A. quitensis</i> | Argentina | Ames 21666 | USDA ARS |
| 246 | <i>A. quitensis</i> | Ecuador   | PI 511738  | USDA ARS |
| 247 | <i>A. quitensis</i> | Peru      | PI 511751  | USDA ARS |
| 248 | <i>A. quitensis</i> | Brazil    | PI 652426  | USDA ARS |
| 249 | <i>A. quitensis</i> | Ecuador   | PI 511749  | USDA ARS |
| 250 | <i>A. quitensis</i> | Argentina | Ames 5334  | USDA ARS |
| 251 | <i>A. quitensis</i> | Ecuador   | Ames 5247  | USDA ARS |
| 252 | <i>A. quitensis</i> | Bolivia   | PI 568154  | USDA ARS |
| 253 | <i>A. quitensis</i> | Ecuador   | PI 490709  | USDA ARS |
| 254 | <i>A. quitensis</i> | Ecuador   | PI 511741  | USDA ARS |

**Table S2.** Accessions that did not flower

| No | Species                   | Country   | Accession Number | Plot |
|----|---------------------------|-----------|------------------|------|
| 1  | <i>A. hypochondriacus</i> | Mexico    | PI 649602        | 714  |
| 2  | ‘hybrid’ group            | Mexico    | PI 604571        | 725  |
| 3  | <i>A. hybridus</i>        | Mexico    | PI 604568        | 1010 |
| 4  | <i>A. hypochondriacus</i> | Mexico    | PI 649587        | 1014 |
| 5  | <i>A. hybridus</i>        | Guatemala | Ames 22001       | 1016 |
| 6  | <i>A. hybridus</i>        | Mexico    | PI 604582        | 1027 |

**Table S3.** Photoperiod-insensitive accessions that are of non-Central American origin but set seed

| No | Species                   | Country   | Accession Number/Name | Plot | Flowering time (day) |
|----|---------------------------|-----------|-----------------------|------|----------------------|
| 1  | <i>A. quitensis</i>       | Brazil    | PI 652428             | 118  | 64                   |
| 2  | <i>A. cruentus</i>        | Germany   | Bärnkrafft            | 125  | 71                   |
| 3  | ‘hybrid’ group            | USA       | PI 568179             | 216  | 65                   |
| 4  | <i>A. hypochondriacus</i> | USA       | PI 568127             | 315  | 71                   |
| 5  | <i>A. cruentus</i>        | USA       | PI 606767             | 424  | 76                   |
| 6  | <i>A. quitensis</i>       | Brazil    | PI 652422             | 428  | 60                   |
| 7  | <i>A. cruentus</i>        | Argentina | PI 636182             | 517  | 71                   |
| 8  | ‘hybrid’ group            | Peru      | PI 511752             | 717  | 50                   |
| 9  | <i>A. cruentus</i>        | Peru      | PI 658731             | 811  | 71                   |
| 10 | <i>A. quitensis</i>       | Peru      | PI 511751             | 817  | 50                   |

**Table S4.** Mild photoperiod-sensitive accessions that are of non-Central American origin but set seed

| No | Species                   | Country   | Accession Number | Plot | Flowering time (day) |
|----|---------------------------|-----------|------------------|------|----------------------|
| 1  | <i>A. hypochondriacus</i> | Chile     | Ames 5355        | 309  | 110                  |
| 2  | <i>A. cruentus</i>        | Brazil    | PI 667165        | 407  | 97                   |
| 3  | <i>A. cruentus</i>        | Venezuela | PI 665286        | 508  | 110                  |
| 4  | <i>A. cruentus</i>        | USA       | PI 515959        | 609  | 82                   |
| 5  | <i>A. hypochondriacus</i> | Brazil    | Ames 5690        | 711  | 102                  |
| 6  | <i>A. cruentus</i>        | Peru      | PI 511714        | 718  | 110                  |
