# Supplementary material
Source: MDPI journal article supplement (https://www.mdpi.com/2073-4395/12/2/505)
Supplement: s1 [file s1]

# Statistical Analyses of Amaranth Characterization Paper

Ali Baturaygil

June 4 , 2021

Packages

Data processing

- I want to remove biomass genotypes, as we don't have categorical data for them (latitudinal groups, species) and some genotypes which did not show successful field emergence.

```
data <- filter(data, !(plot %in% c(205, 510, 526, 610, 712, 810, 1024)), species!="biomass" )>%
  dplyr::select(genotypes, species, country, plot, seed_setting, ft_adjusted, ph_adjusted, longitude)

data_species <- data
summary(data)
```

```
##   genotypes      species      country      plot
## Length:254      Length:254      Length:254      Min.   : 101.0
## Class :character Class :character Class :character 1st Qu.: 313.5
## Mode  :character Mode  :character Mode  :character Median : 526.0
##                                     Mean  : 562.3
##                                     3rd Qu.: 815.8
##                                     Max.   :1028.0
##
##   seed_setting  ft_adjusted  ph_adjusted  longitude
## Min.   :0.0000  Min.   : 50.0  Min.   : 45.2  Min.   : -108.83
## 1st Qu.:0.0000  1st Qu.:102.0  1st Qu.:196.0  1st Qu.: -90.79
## Median :0.0000  Median :110.0  Median :224.1  Median : -77.59
## Mean   :0.1929  Mean   :106.3  Mean   :220.3  Mean   : -79.99
## 3rd Qu.:0.0000  3rd Qu.:113.0  3rd Qu.:249.2  3rd Qu.: -72.96
## Max.   :1.0000  Max.   :160.0  Max.   :359.9  Max.   : -42.88
##                                     NA's   :11
##                                     NA's   :18
##                                     NA's   :28
##   latitude      elevation      prec      temp
## Min.   : -41.035  Min.   : 43  Min.   : 0.50  Min.   : 3.60
## 1st Qu.: -13.636  1st Qu.:1887  1st Qu.: 53.35  1st Qu.:12.92
## Median : -9.000  Median :2650  Median : 64.46  Median :14.83
## Mean   : -3.286  Mean   :2436  Mean   : 72.36  Mean   :15.38
## 3rd Qu.: 14.694  3rd Qu.:3105  3rd Qu.: 78.75  3rd Qu.:17.89
## Max.   : 27.417  Max.   :4518  Max.   :344.00  Max.   :26.92
## NA's   :26      NA's   :28  NA's   :28  NA's   :28
##   sr      GDD10c
## Min.   :11788  Min.   : 416.1
## 1st Qu.:15077  1st Qu.: 884.4
## Median :16339  Median : 967.0
## Mean   :16222  Mean   : 911.6
## 3rd Qu.:17260  3rd Qu.: 984.9
## Max.   :19655  Max.   :1196.2
```

```
## NA's :28      NA's :11
```

## 1. Comparison of species

### Phenotypic traits

#### A. Flowering time

```
ggdensity(data_species$ft_adjusted,  
           main = "Density plot of flowering time",  
           xlab = "flowering time")
```

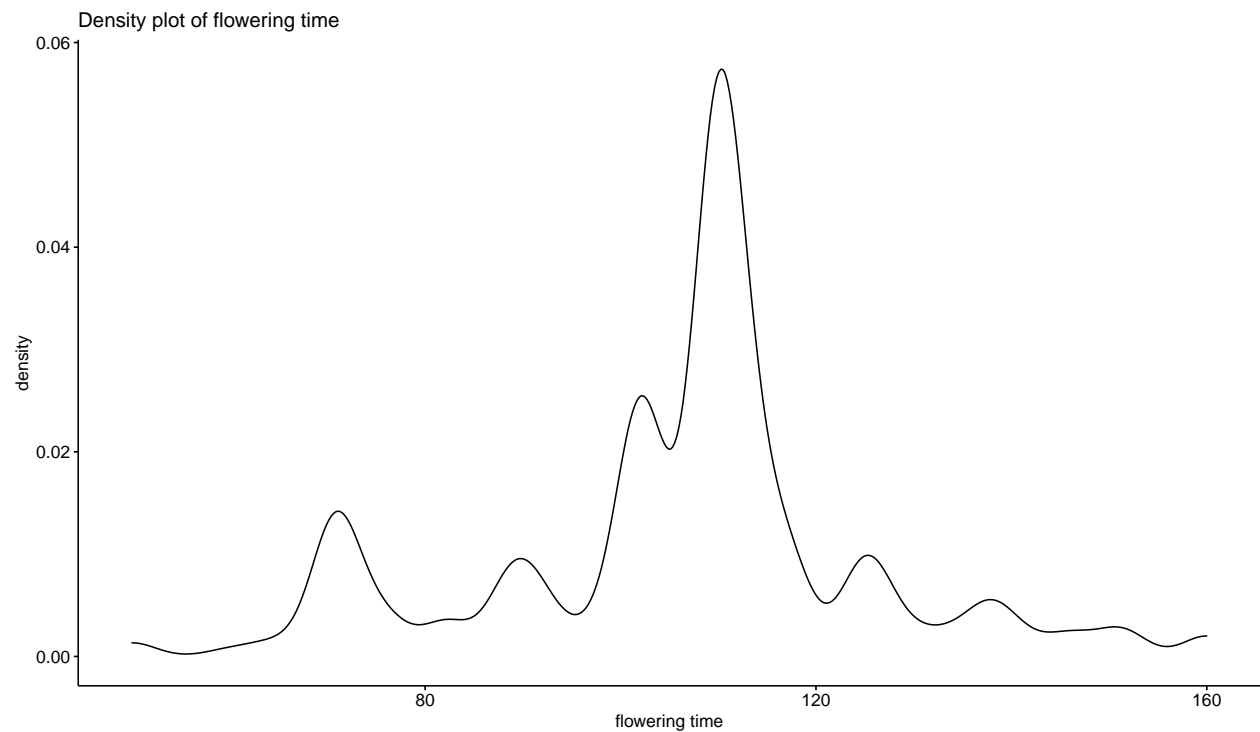

```
ggplot(data = data_species, mapping = aes(x = species, y = ft_adjusted)) +  
  geom_boxplot(outlier.size = -1)+geom_jitter(position=position_jitter(0.2), size=0.4)
```

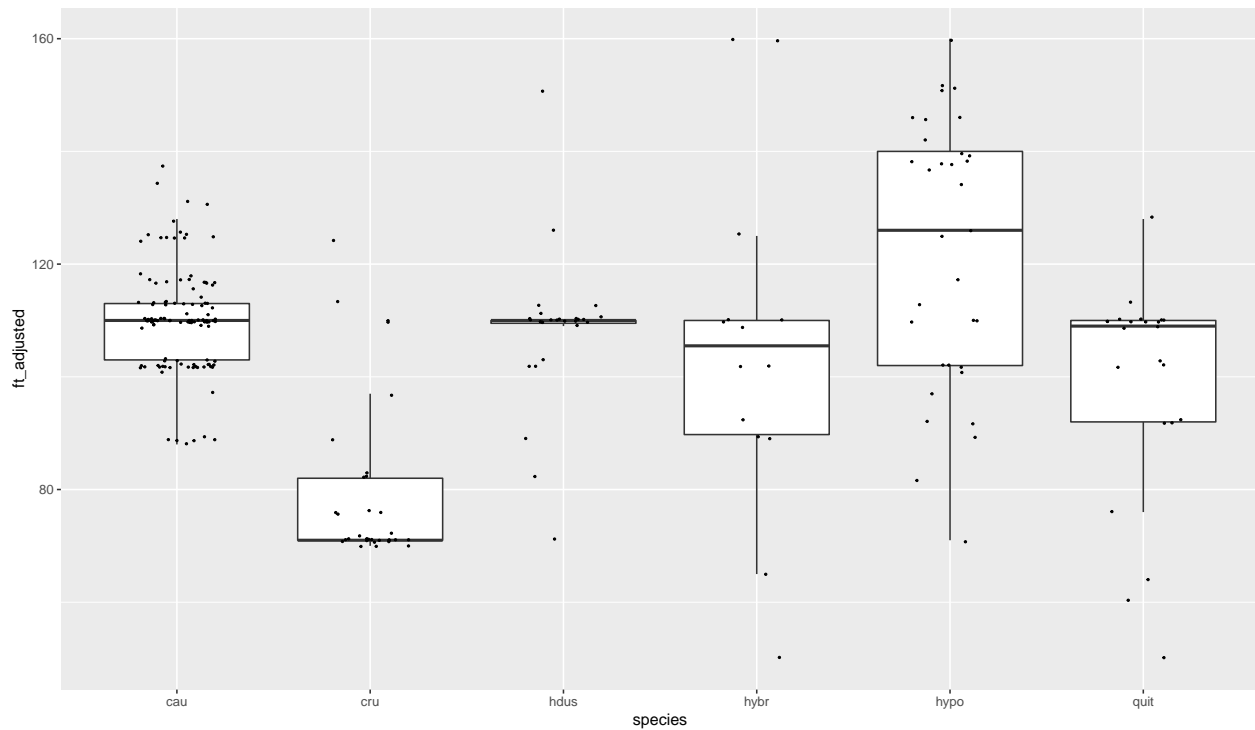

```
md_1 <- glm(ft_adjusted ~ species, data = data_species, family = gaussian)
summary(md_1)
```

```
##
## Call:
## glm(formula = ft_adjusted ~ species, family = gaussian, data = data_species)
##
## Deviance Residuals:
##      Min       1Q   Median       3Q      Max
## -55.214  -8.281  -0.281   6.719  54.786
##
## Coefficients:
##              Estimate Std. Error t value Pr(>|t|)
## (Intercept)   110.281     1.484   74.302 < 2e-16 ***
## speciescru    -30.843     3.170  -9.729 < 2e-16 ***
## specieshdus    -2.021     3.392  -0.596 0.551752
## specieshybr    -5.066     4.488  -1.129 0.260073
## specieshypo    12.053     3.133   3.848 0.000153 ***
## speciesquit   -11.063     3.622  -3.054 0.002515 **
## ---
## Signif. codes:  0 '***' 0.001 '**' 0.01 '*' 0.05 '.' 0.1 ' ' 1
##
## (Dispersion parameter for gaussian family taken to be 251.1295)
##
##      Null deviance: 94172  on 242  degrees of freedom
## Residual deviance: 59518  on 237  degrees of freedom
## (11 observations deleted due to missingness)
## AIC: 2040.3
##
## Number of Fisher Scoring iterations: 2
```

```

lrtest(md_1)

## Likelihood ratio test
##
## Model 1: ft_adjusted ~ species
## Model 2: ft_adjusted ~ 1
##   #Df LogLik Df Chisq Pr(>Chisq)
## 1    7 -1013.2
## 2    2 -1068.9 -5 111.5 < 2.2e-16 ***
## ---
## Signif. codes:  0 '***' 0.001 '**' 0.01 '*' 0.05 '.' 0.1 ' ' 1

lsmeans_species_ft <- LSD.test(md_1, "species", p.adj="none" )
lsmeans_species_ft

## $statistics
##      MSerror Df      Mean      CV
## 251.1295 237 106.2922 14.90897
##
## $parameters
##      test p.adjusted name.t ntr alpha
## Fisher-LSD      none species    6 0.05
##
## $means
##      ft_adjusted      std    r      LCL      UCL Min Max    Q25    Q50 Q75
## cau    110.28070  9.297929 114 107.35677 113.20464  88 137 103.00 110.0 113
## cru    79.43750 14.840958  32  73.91869  84.95631  70 124  71.00  71.0  82
## hdus   108.25926 13.586171  27 102.25114 114.26738  71 151 109.50 110.0 110
## hybr   105.21429 30.209979  14  96.87063 113.55794  50 160  89.75 105.5 110
## hypo   122.33333 23.766661  33 116.89879 127.76788  71 160 102.00 126.0 140
## quit    99.21739 19.284842  23  92.70776 105.72702  50 128  92.00 109.0 110
##
## $comparison
## NULL
##
## $groups
##      ft_adjusted groups
## hypo   122.33333      a
## cau    110.28070      b
## hdus   108.25926      b
## hybr   105.21429     bc
## quit    99.21739      c
## cru    79.43750      d
##
## attr(,"class")
## [1] "group"

```

## B. Plant height

```

ggdensity(data_species$ph_adjusted,
  main = "Density plot of plant height",
  xlab = "Plant height")

```

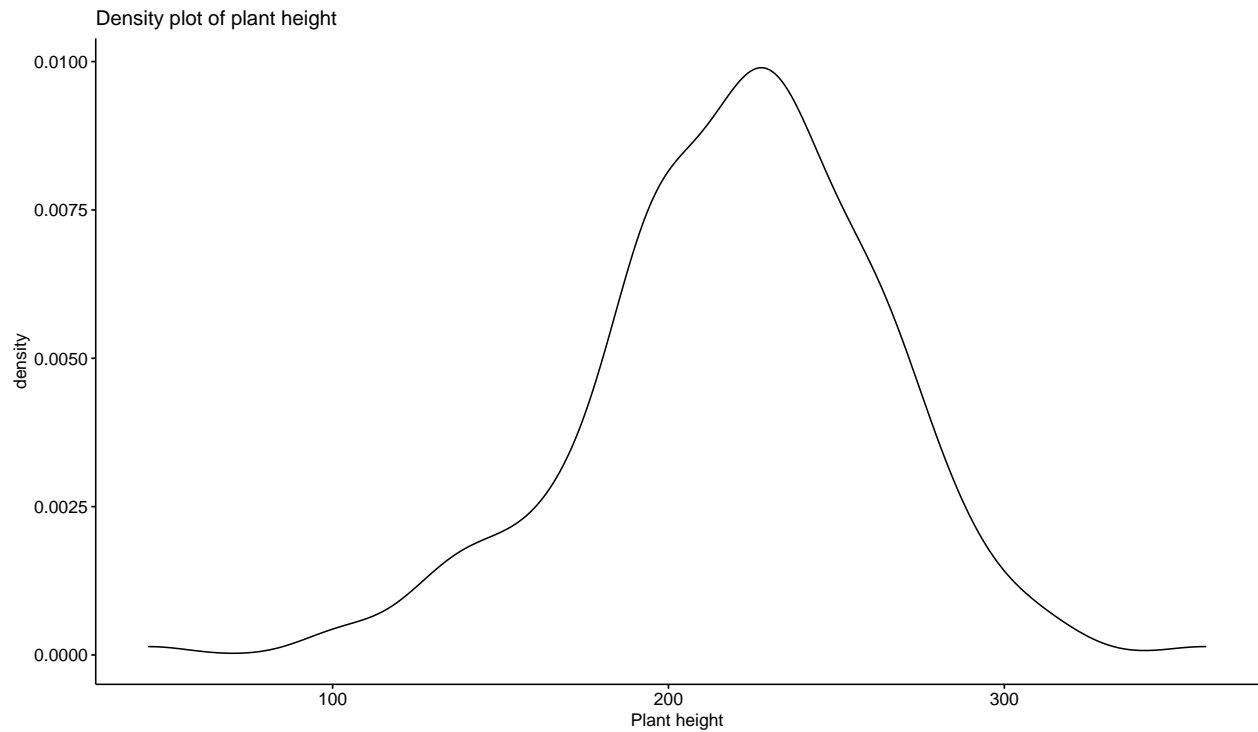

```
ggplot(data = data_species, mapping = aes(x = species, y = ph_adjusted)) +  
  geom_boxplot(outlier.size = -1)+geom_jitter(position=position_jitter(0.2), size=0.4)
```

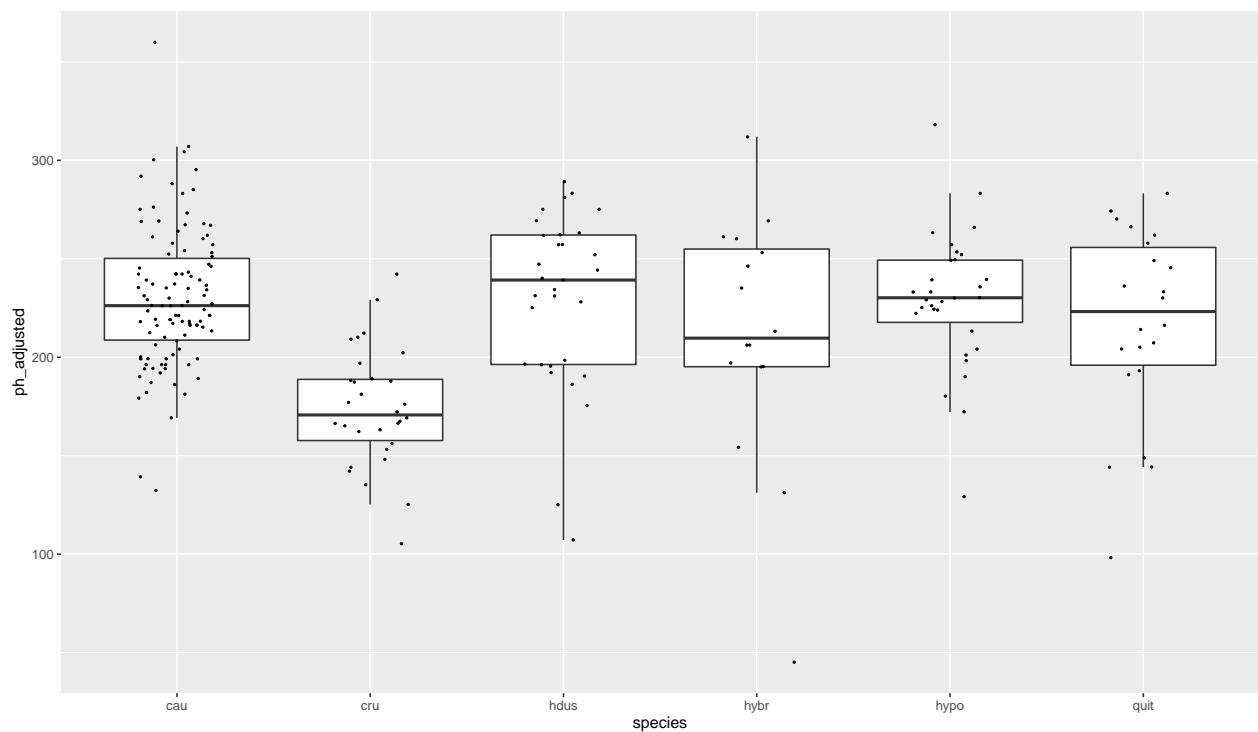

```
md_2 <-glm(ph_adjusted ~ species , data = data_species, family = gaussian)  
summary(md_2)
```

```
##  
## Call:
```

```
## glm(formula = ph_adjusted ~ species, family = gaussian, data = data_species)
##
## Deviance Residuals:
##      Min       1Q   Median       3Q      Max
## -166.109   -21.357    -0.856    25.053   129.823
##
## Coefficients:
##              Estimate Std. Error t value Pr(>|t|)
## (Intercept) 230.1269     3.8541  59.709 < 2e-16 ***
## speciescru  -55.7602     8.2061  -6.795 9.19e-11 ***
## specieshdus  -0.7253     8.1023  -0.090  0.9288
## specieshybr -18.8175    10.6426  -1.768  0.0784 .
## specieshypo  -1.0559     8.1023  -0.130  0.8964
## speciesquit -13.0860     9.2965  -1.408  0.1606
## ---
## Signif. codes:  0 '***' 0.001 '**' 0.01 '*' 0.05 '.' 0.1 ' ' 1
##
## (Dispersion parameter for gaussian family taken to be 1574.569)
##
##      Null deviance: 442163  on 235  degrees of freedom
## Residual deviance: 362151  on 230  degrees of freedom
## (18 observations deleted due to missingness)
## AIC: 2415
##
## Number of Fisher Scoring iterations: 2
```

```
lrtest(md_2)
```

```
## Likelihood ratio test
##
## Model 1: ph_adjusted ~ species
## Model 2: ph_adjusted ~ 1
##   #Df LogLik Df Chisq Pr(>Chisq)
## 1    7 -1200.5
## 2    2 -1224.1 -5 47.11  5.396e-09 ***
## ---
## Signif. codes:  0 '***' 0.001 '**' 0.01 '*' 0.05 '.' 0.1 ' ' 1
```

```
lsmeans_species_ph <- LSD.test(md_2, "species", p.adj="none" )
lsmeans_species_ph
```

```
## $statistics
##      MSerror Df      Mean      CV
## 1574.569 230 220.3091 18.01144
##
## $parameters
##      test p.adjusted name.t ntr alpha
## Fisher-LSD      none species 6 0.05
##
## $means
##      ph_adjusted      std      r      LCL      UCL      Min      Max      Q25      Q50
## cau      230.1269 35.25617 106 222.5329 237.7208 132.2 359.95 208.700 226.2
## cru      174.3667 30.13885  30 160.0922 188.6411 105.2 242.20 157.700 170.7
## hdus      229.4016 44.29120  31 215.3593 243.4439 107.2 289.20 196.325 239.2
## hybr      211.3094 63.21781  16 191.7633 230.8555  45.2 311.95 195.200 209.7
```

```
## hypo    229.0710 34.76474 31 215.0286 243.1133 129.2 318.20 217.700 230.2
## quit    217.0409 48.91085 22 200.3719 233.7099 98.2 283.20 195.950 223.2
##          Q75
## cau    250.2000
## cru    188.7625
## hdus   262.0750
## hybr   254.9500
## hypo   249.3250
## quit   255.7625
##
## $comparison
## NULL
##
## $groups
##      ph_adjusted groups
## cau    230.1269      a
## hdus    229.4016      a
## hypo    229.0710      a
## quit    217.0409      a
## hybr    211.3094      a
## cru     174.3667      b
##
## attr("class")
## [1] "group"
```

### C. Seed setting

- It is a binomial trait, so I use binomial regression model.

```
data_species$seed_setting <- as.numeric(data_species$seed_setting)
```

```
data_species$seed_setting <- as.integer(data_species$seed_setting)
```

```
md_3 <- glm(seed_setting ~ species, data = data_species, family = binomial(link = "logit"))
summary(md_3)
```

```
##
## Call:
## glm(formula = seed_setting ~ species, family = binomial(link = "logit"),
##      data = data_species)
##
## Deviance Residuals:
##      Min       1Q   Median       3Q      Max
## -2.06885  -0.45118  -0.00005  -0.00005   2.16119
##
## Coefficients:
##              Estimate Std. Error z value Pr(>|z|)
## (Intercept)   -20.57    1653.37  -0.012   0.990
## speciescru     22.58    1653.37   0.014   0.989
## specieshdus    18.33    1653.37   0.011   0.991
## specieshybr    18.62    1653.37   0.011   0.991
## specieshypo    19.79    1653.37   0.012   0.990
## speciesquit    18.67    1653.37   0.011   0.991
##
## (Dispersion parameter for binomial family taken to be 1)
```

```
##
## Null deviance: 249.13 on 253 degrees of freedom
## Residual deviance: 117.78 on 248 degrees of freedom
## AIC: 129.78
##
## Number of Fisher Scoring iterations: 19

lrtest(md_3)

## Likelihood ratio test
##
## Model 1: seed_setting ~ species
## Model 2: seed_setting ~ 1
## #Df LogLik Df Chisq Pr(>Chisq)
## 1 6 -58.892
## 2 1 -124.567 -5 131.35 < 2.2e-16 ***
## ---
## Signif. codes: 0 '***' 0.001 '**' 0.01 '*' 0.05 '.' 0.1 ' ' 1

lsmeans_species_ss <- LSD.test(md_3, "species", p.adj="none" )
lsmeans_species_ss

## $statistics
## MSerror Df Mean CV
## 0.4749391 248 0.1929134 357.2371
##
## $parameters
## test p.adjusted name.t ntr alpha
## Fisher-LSD none species 6 0.05
##
## $means
## seed_setting std r LCL UCL Min Max Q25 Q50 Q75
## cau 0.00000000 0.0000000 115 -0.1265735 0.1265735 0 0 0 0 0
## cru 0.88235294 0.3270350 34 0.6495695 1.1151364 0 1 1 1 1
## hdus 0.09677419 0.3005372 31 -0.1470129 0.3405613 0 1 0 0 0
## hybr 0.12500000 0.3415650 16 -0.2143373 0.4643373 0 1 0 0 0
## hypo 0.31428571 0.4710082 35 0.0848518 0.5437196 0 1 0 0 1
## quit 0.13043478 0.3443502 23 -0.1525921 0.4134617 0 1 0 0 0
##
## $comparison
## NULL
##
## $groups
## seed_setting groups
## cru 0.88235294 a
## hypo 0.31428571 b
## quit 0.13043478 bc
## hybr 0.12500000 bc
## hdus 0.09677419 bc
## cau 0.00000000 c
##
## attr(,"class")
## [1] "group"
```



#### D. Growing degree days (Tbase is 10°C)

```
ggdensity(data_species$GDD10c,  
  main = "Density plot of flowering time",  
  xlab = "Flowering Time")
```

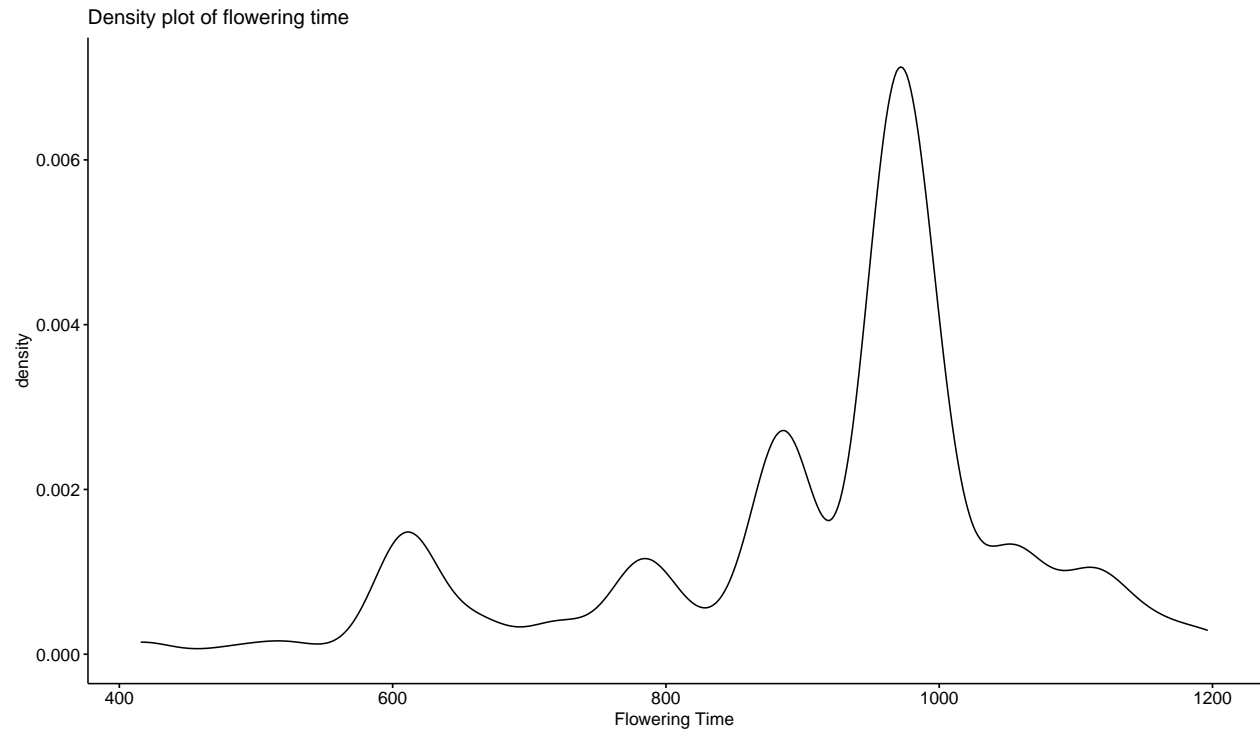

```
ggplot(data = data_species, mapping = aes(x = species, y = GDD10c)) +  
  geom_boxplot(outlier.size = -1)+geom_jitter(position=position_jitter(0.2), size=0.4)
```

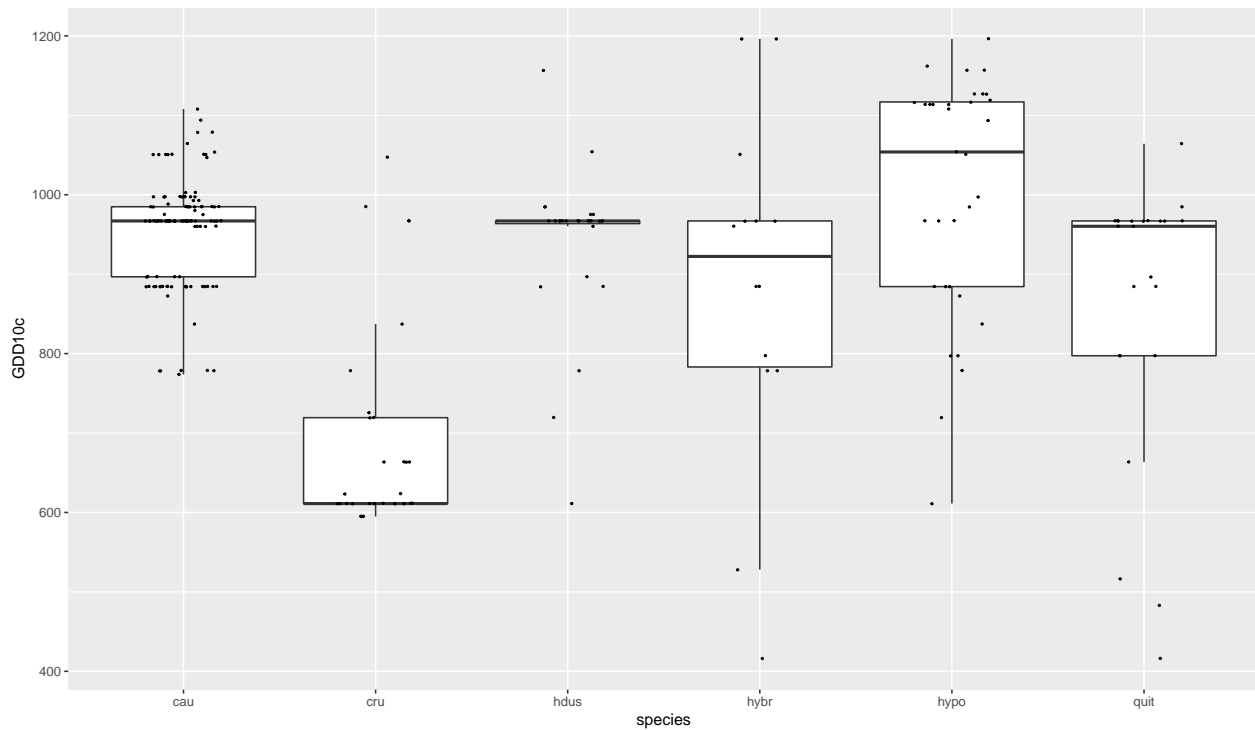

```
md_4 <-glm(GDD10c ~ species , data = data_species, family = gaussian)
summary(md_4)
```

```
##
## Call:
## glm(formula = GDD10c ~ species, family = gaussian, data = data_species)
##
## Deviance Residuals:
##      Min       1Q   Median       3Q      Max
## -467.61   -70.42    12.23    47.72   359.99
##
## Coefficients:
##              Estimate Std. Error t value Pr(>|t|)
## (Intercept)    954.77     11.17  85.460 < 2e-16 ***
## speciescru   -267.61     23.86 -11.214 < 2e-16 ***
## specieshdus   -13.90     25.53  -0.544 0.586621
## specieshybr   -71.11     33.78  -2.105 0.036352 *
## specieshypo    48.66     23.58   2.064 0.040128 *
## speciesquit   -93.50     27.27  -3.429 0.000714 ***
## ---
## Signif. codes:  0 '***' 0.001 '**' 0.01 '*' 0.05 '.' 0.1 ' ' 1
##
## (Dispersion parameter for gaussian family taken to be 14229.2)
##
##      Null deviance: 5567350  on 242  degrees of freedom
## Residual deviance: 3372322  on 237  degrees of freedom
## (11 observations deleted due to missingness)
## AIC: 3021.4
##
## Number of Fisher Scoring iterations: 2
```

```
lrtest(md_4)
```

```
## Likelihood ratio test
##
## Model 1: GDD10c ~ species
## Model 2: GDD10c ~ 1
##   #Df LogLik Df  Chisq Pr(>Chisq)
## 1    7 -1503.7
## 2    2 -1564.6 -5 121.82 < 2.2e-16 ***
## ---
## Signif. codes:  0 '***' 0.001 '**' 0.01 '*' 0.05 '.' 0.1 ' ' 1
```

```
lsmeans_species_GDD10c <- LSD.test(md_4, "species", p.adj="none" )
lsmeans_species_GDD10c
```

```
## $statistics
##   MSerror Df      Mean      CV
## 14229.2 237 911.6481 13.08468
##
## $parameters
##           test p.adjusted name.t ntr alpha
## Fisher-LSD      none species   6  0.05
##
## $means
##           GDD10c      std    r      LCL      UCL      Min      Max      Q25
## cau   954.7715  68.84005 114 932.7620  976.7810 773.80 1107.95 896.7000
## cru   687.1609 130.24622  32 645.6190  728.7029 594.90 1047.15 611.2000
## hdus   940.8704 101.52242  27 895.6452  986.0955 611.20 1156.65 963.6500
## hybr   883.6643 219.19917  14 820.8588  946.4698 416.05 1196.15 783.1625
## hypo 1003.4348 150.82466  33 962.5272 1044.3425 611.20 1196.15 884.3500
## quit   861.2717 177.14793  23 812.2715  910.2719 416.05 1064.15 797.3000
##           Q50      Q75
## cau   967.000  984.90
## cru   611.200  719.35
## hdus   967.000  967.00
## hybr   922.325  967.00
## hypo 1053.850 1116.80
## quit   960.300  967.00
##
## $comparison
## NULL
##
## $groups
##           GDD10c groups
## hypo 1003.4348      a
## cau   954.7715      b
## hdus   940.8704     bc
## hybr   883.6643     cd
## quit   861.2717      d
## cru   687.1609      e
##
## attr("class")
## [1] "group"
```

## 2. Climatic & Geographical Variables

### A. Temperature

Distribution of the data.

```
ggdensity(data_species$temp,  
  main = "Density plot of temperature",  
  xlab = "Temperature yearly average")
```

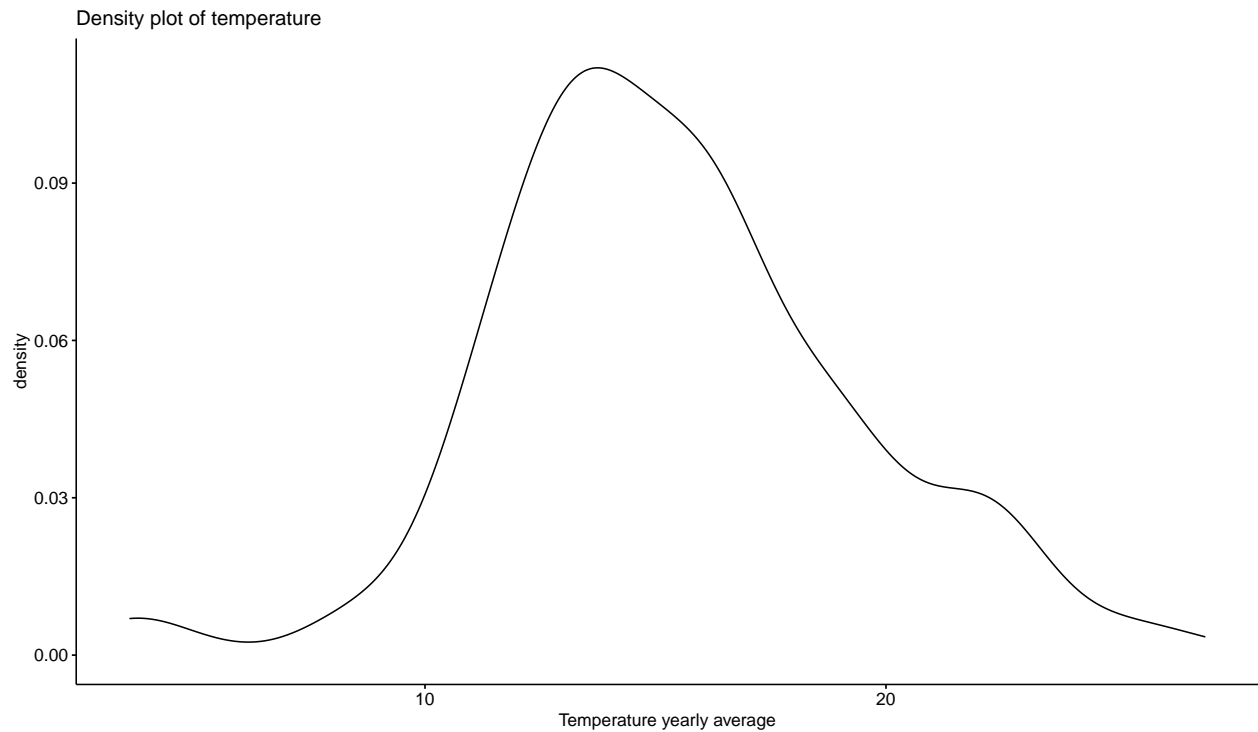

```
ggplot(data = data_species, mapping = aes(x = species, y = temp)) +  
  geom_boxplot(outlier.size = -1)+geom_jitter(position=position_jitter(0.2), size=0.4)
```

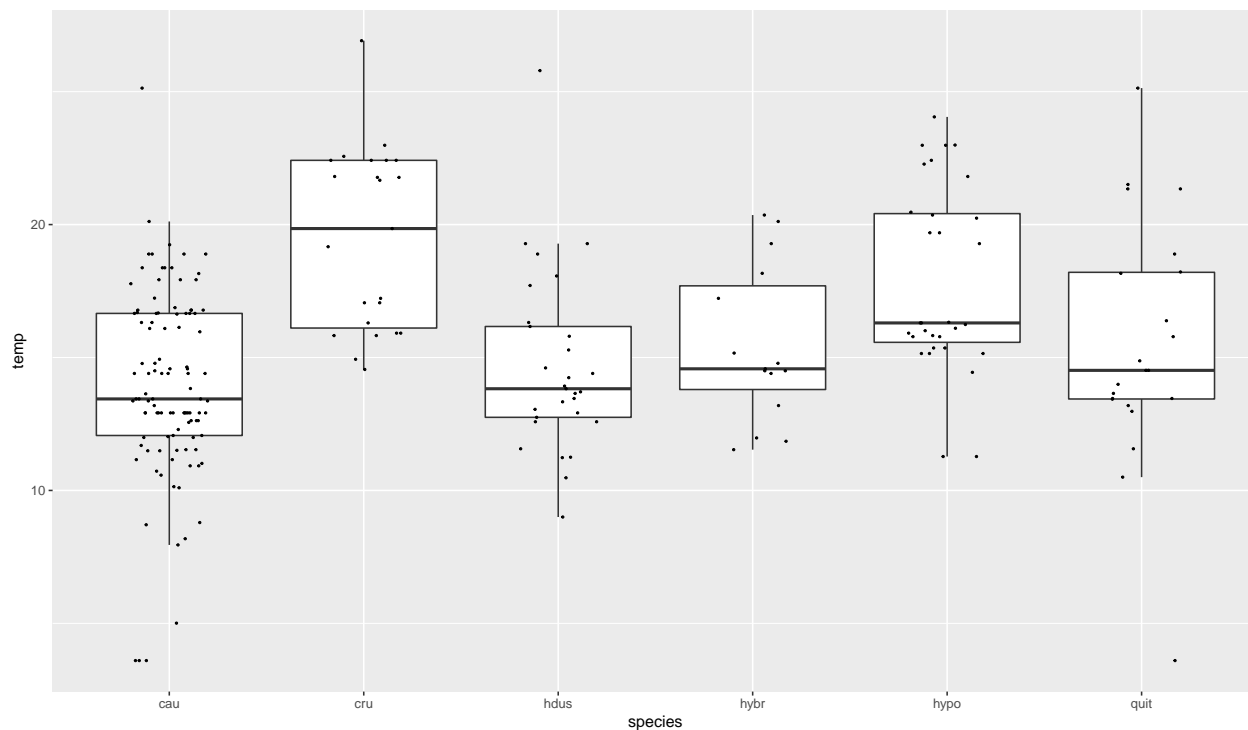

```
md_5 <-glm(temp ~ species , data = data_species, family = gaussian)
summary(md_5)
```

```
##
## Call:
## glm(formula = temp ~ species, family = gaussian, data = data_species)
##
## Deviance Residuals:
##      Min       1Q   Median       3Q      Max
## -11.8773  -2.0715  -0.6303   2.7193  11.1943
##
## Coefficients:
##              Estimate Std. Error t value Pr(>|t|)
## (Intercept)  13.9391     0.3460  40.286 < 2e-16 ***
## speciescru    5.5732     0.8194   6.801 9.65e-11 ***
## specieshdus   0.7213     0.7465   0.966  0.3350
## specieshybr   1.5026     0.9827   1.529  0.1277
## specieshypo   3.8991     0.7274   5.360 2.09e-07 ***
## speciesquit   1.5382     0.8346   1.843  0.0667 .
## ---
## Signif. codes:  0 '***' 0.001 '**' 0.01 '*' 0.05 '.' 0.1 ' ' 1
##
## (Dispersion parameter for gaussian family taken to be 12.69022)
##
##      Null deviance: 3607.3  on 225  degrees of freedom
## Residual deviance: 2791.8  on 220  degrees of freedom
## (28 observations deleted due to missingness)
## AIC: 1223.5
##
## Number of Fisher Scoring iterations: 2
```

```
lrtest(md_5)
```

```
## Likelihood ratio test
##
## Model 1: temp ~ species
## Model 2: temp ~ 1
##   #Df LogLik Df  Chisq Pr(>Chisq)
## 1    7 -604.75
## 2    2 -633.71 -5 57.913  3.278e-11 ***
## ---
## Signif. codes:  0 '***' 0.001 '**' 0.01 '*' 0.05 '.' 0.1 ' ' 1
```

```
lsmeans_species_temp <- LSD.test(md_5, "species", p.adj="none" )
lsmeans_species_temp
```

```
## $statistics
##      MSerror Df      Mean      CV
## 12.69022 220 15.38311 23.15743
##
## $parameters
##      test p.adjusted name.t ntr alpha
## Fisher-LSD      none species  6 0.05
##
## $means
##      temp      std    r      LCL      UCL      Min      Max      Q25
## cau 13.93907 3.505962 106 13.25716 14.62098  3.60000 25.13333 12.06667
## cru 19.51232 3.414973  23 18.04841 20.97623 14.55000 26.91667 16.10833
## hdus 14.66034 3.376270  29 13.35664 15.96405  9.00000 25.79167 12.75000
## hybr 15.44167 2.937050  15 13.62894 17.25440 11.53333 20.35833 13.79583
## hypo 17.83817 3.494242  31 16.57722 19.09912 11.27500 24.05000 15.57083
## quit 15.47727 4.569101  22 13.98046 16.97408  3.60000 25.13333 13.43958
##      Q50      Q75
## cau 13.44167 16.65833
## cru 19.85000 22.41667
## hdus 13.82500 16.16667
## hybr 14.57500 17.69583
## hypo 16.30000 20.41250
## quit 14.51667 18.20417
##
## $comparison
## NULL
##
## $groups
##      temp groups
## cru 19.51232    a
## hypo 17.83817    a
## quit 15.47727    b
## hybr 15.44167    b
## hdus 14.66034    b
## cau 13.93907    b
##
## attr(,"class")
## [1] "group"
```

## B. Precipitation

```
ggdensity(data_species$prec,  
  main = "Density plot of precipitation",  
  xlab = "Precipitation yearly average")
```

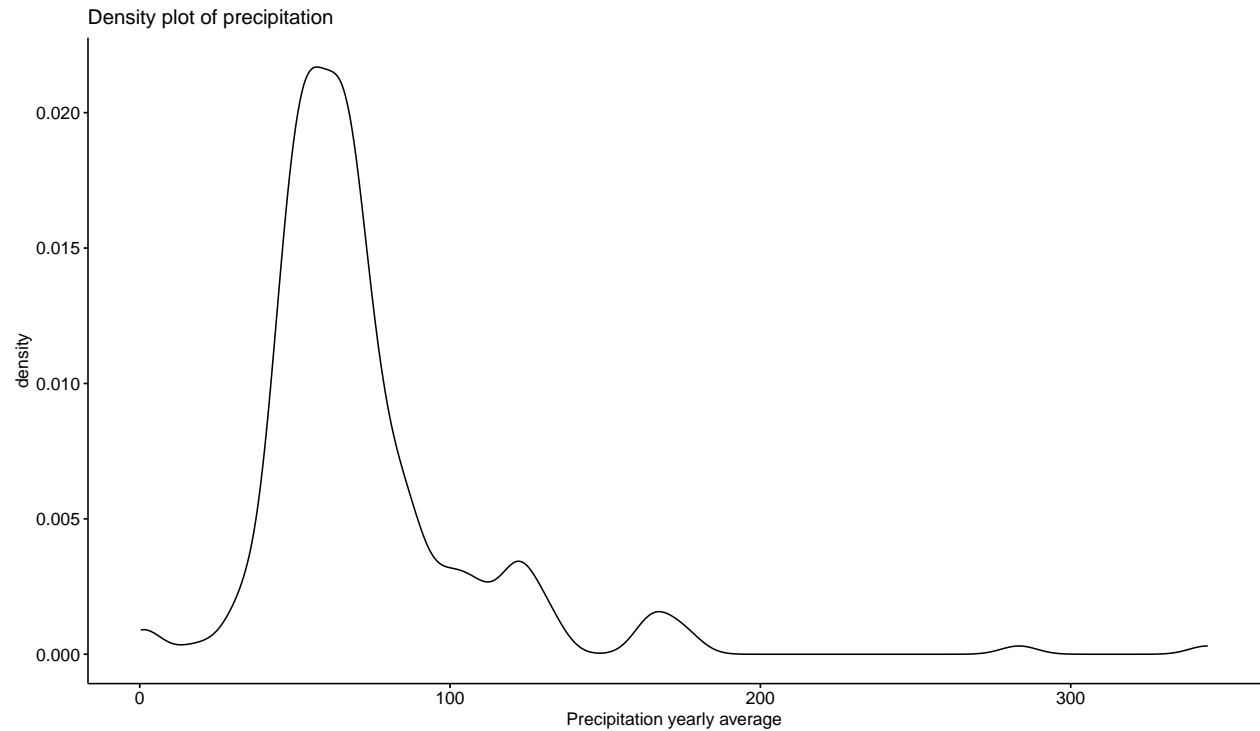

```
ggplot(data = data_species, mapping = aes(x = species, y = prec)) +  
  geom_boxplot(outlier.size = -1)+geom_jitter(position=position_jitter(0.2), size=0.4)
```

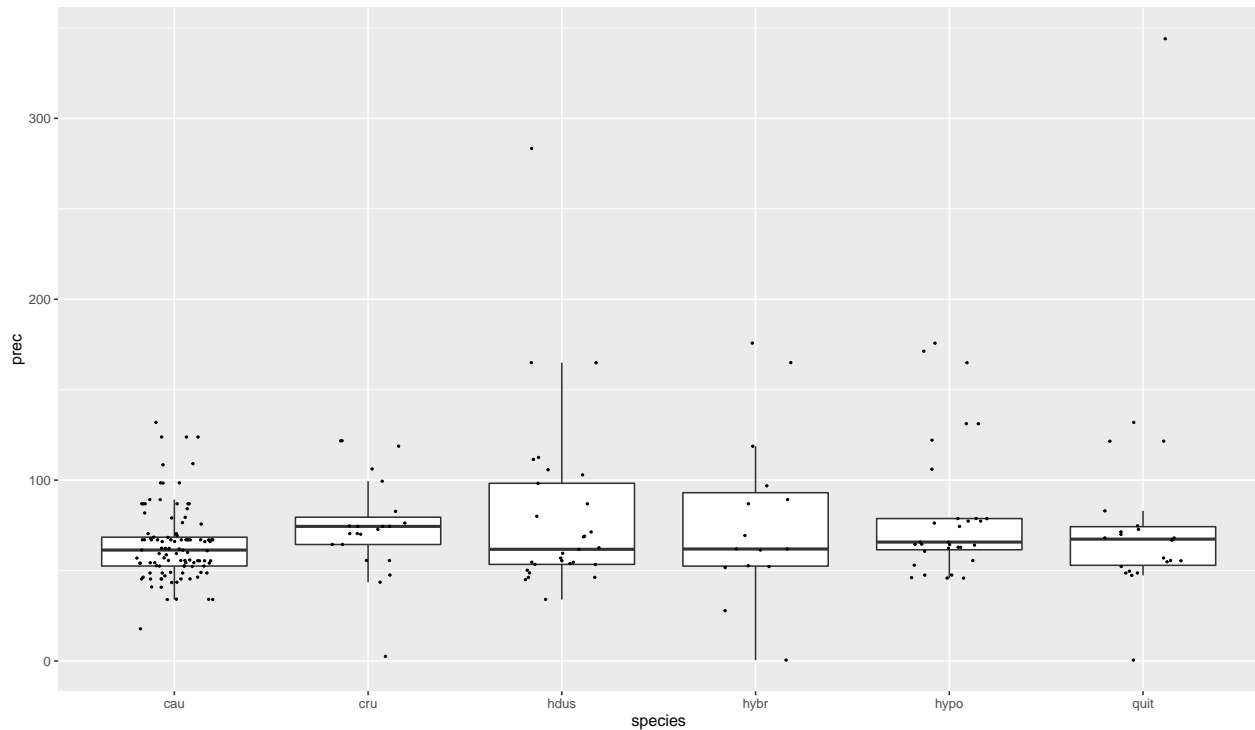

```
md_6 <-glm(prec ~ species , data = data_species, family = gaussian)
summary(md_6)
```

```
##
## Call:
## glm(formula = prec ~ species, family = gaussian, data = data_species)
##
## Deviance Residuals:
##      Min       1Q   Median       3Q      Max
## -79.652  -19.013   -7.422    5.496  263.848
##
## Coefficients:
##              Estimate Std. Error t value Pr(>|t|)
## (Intercept)    64.359     3.555  18.103  <2e-16 ***
## speciescru     10.271     8.420   1.220  0.2238
## specieshdus    16.888     7.671   2.202  0.0287 *
## specieshybr    13.763    10.098   1.363  0.1743
## specieshypo    17.031     7.474   2.279  0.0236 *
## speciesquit    15.792     8.576   1.842  0.0669 .
## ---
## Signif. codes:  0 '***' 0.001 '**' 0.01 '*' 0.05 '.' 0.1 ' ' 1
##
## (Dispersion parameter for gaussian family taken to be 1339.809)
##
##      Null deviance: 308314  on 225  degrees of freedom
## Residual deviance: 294758  on 220  degrees of freedom
## (28 observations deleted due to missingness)
## AIC: 2276.5
##
## Number of Fisher Scoring iterations: 2
```



```
lrtest(md_6)
```

```
## Likelihood ratio test
##
## Model 1: prec ~ species
## Model 2: prec ~ 1
##   #Df LogLik Df  Chisq Pr(>Chisq)
## 1    7 -1131.3
## 2    2 -1136.3 -5 10.162    0.07079 .
## ---
## Signif. codes:  0 '***' 0.001 '**' 0.01 '*' 0.05 '.' 0.1 ' ' 1
```

```
lsmeans_species_prec <- LSD.test(md_6, "species", p.adj="none" )
lsmeans_species_prec
```

```
## $statistics
##      MSerror Df      Mean      CV
## 1339.809 220 72.35841 50.58625
##
## $parameters
##      test p.adjusted name.t ntr alpha
## Fisher-LSD      none species 6 0.05
##
## $means
##      prec      std  r      LCL      UCL      Min      Max      Q25
## cau 64.35928 20.33200 106 57.35260 71.36596 17.833333 131.9167 52.50000
## cru 74.63043 26.92531 23 59.58858 89.67229 2.583333 121.7500 64.41667
## hdus 81.24713 50.96899 29 67.85140 94.64285 34.000000 283.3333 53.41667
## hybr 78.12222 46.84483 15 59.49622 96.74822 0.500000 175.7500 52.45833
## hypo 81.38978 37.40327 31 68.43338 94.34619 45.833333 175.7500 61.50000
## quit 80.15152 65.45480 22 64.77160 95.53143 0.500000 344.0000 52.89583
##      Q50      Q75
## cau 61.33333 68.45833
## cru 74.41667 79.50000
## hdus 61.75000 98.25000
## hybr 61.91667 93.04167
## hypo 65.75000 78.75000
## quit 67.37500 74.25000
##
## $comparison
## NULL
##
## $groups
##      prec groups
## hypo 81.38978 a
## hdus 81.24713 a
## quit 80.15152 ab
## hybr 78.12222 ab
## cru 74.63043 ab
## cau 64.35928 b
##
## attr(,"class")
## [1] "group"
```

### C. Solar Radiation

```
ggdensity(data_species$sr,  
  main = "Density plot of SR",  
  xlab = "Solar Radiation yearly average")
```

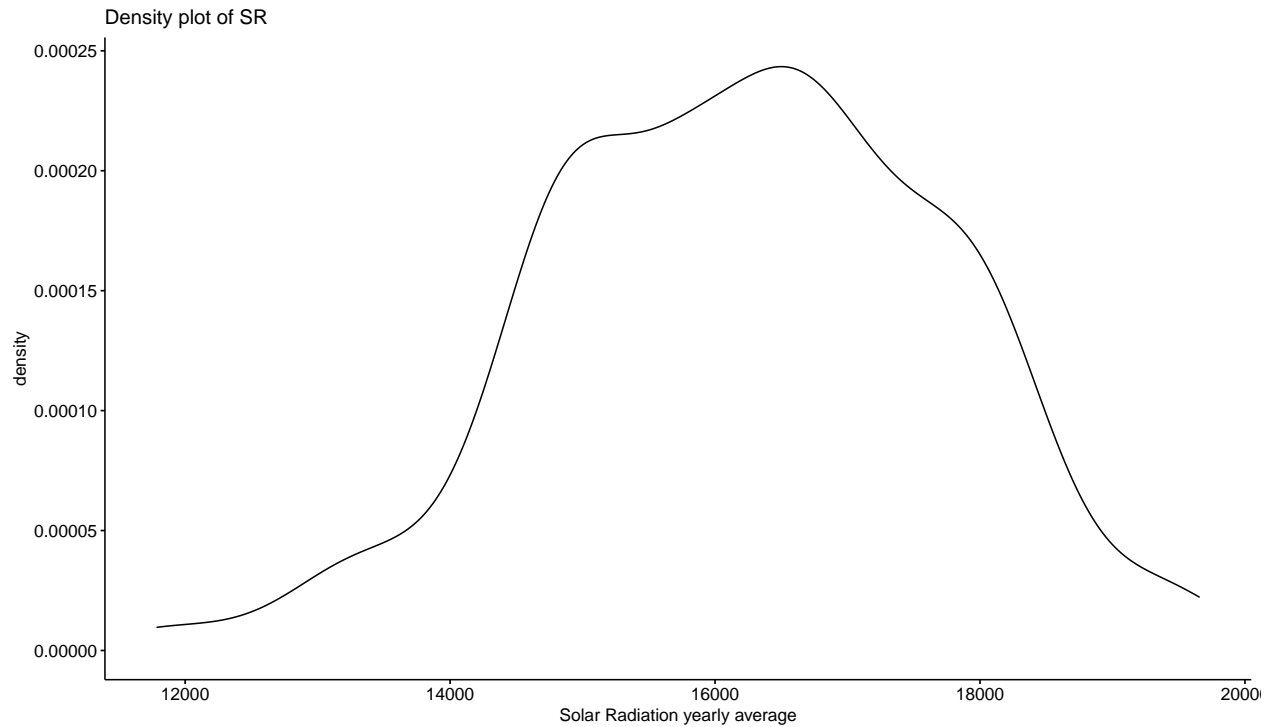

```
ggplot(data = data_species, mapping = aes(x = species, y = sr)) +  
  geom_boxplot(outlier.size = -1)+geom_jitter(position=position_jitter(0.2), size=0.4)
```

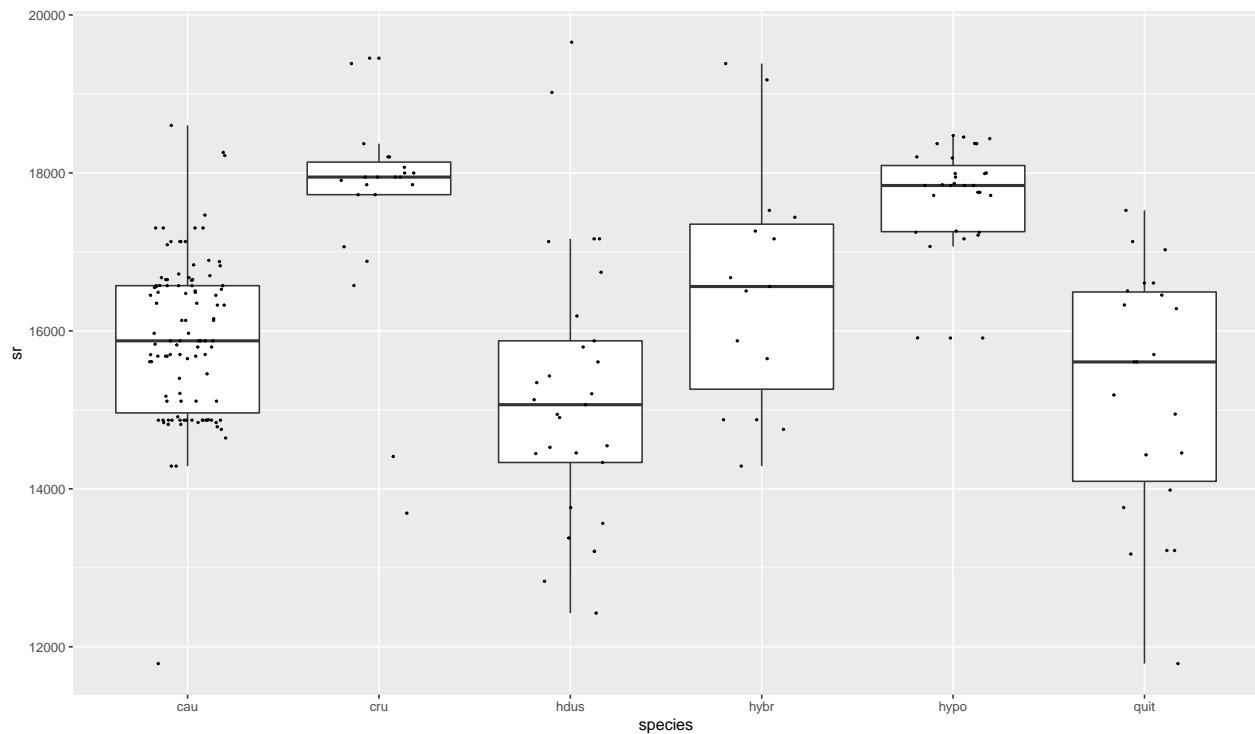

```
md_7 <-glm(sr ~ species , data = data_species, family = gaussian)
summary(md_7)
```

```
##
## Call:
## glm(formula = sr ~ species, family = gaussian, data = data_species)
##
## Deviance Residuals:
##      Min       1Q   Median       3Q      Max
## -4128.6   -803.9    110.9    663.5   4446.4
##
## Coefficients:
##              Estimate Std. Error t value Pr(>|t|)
## (Intercept)  15916.4     118.3  134.599 < 2e-16 ***
## speciescru    1762.0     280.0   6.292 1.68e-09 ***
## specieshdus   -708.0     255.1  -2.775 0.00599 **
## specieshybr    617.5     335.9   1.839 0.06732 .
## specieshypo   1753.1     248.6   7.052 2.25e-11 ***
## speciesquit   -664.5     285.2  -2.330 0.02074 *
## ---
## Signif. codes:  0 '***' 0.001 '**' 0.01 '*' 0.05 '.' 0.1 ' ' 1
##
## (Dispersion parameter for gaussian family taken to be 1482219)
##
##      Null deviance: 501678361  on 225  degrees of freedom
## Residual deviance: 326088184  on 220  degrees of freedom
## (28 observations deleted due to missingness)
## AIC: 3860.5
##
## Number of Fisher Scoring iterations: 2
```

```
lrtest(md_7)
```

```
## Likelihood ratio test
##
## Model 1: sr ~ species
## Model 2: sr ~ 1
##   #Df LogLik Df  Chisq Pr(>Chisq)
## 1    7 -1923.3
## 2    2 -1971.9 -5  97.359  < 2.2e-16 ***
## ---
## Signif. codes:  0 '***' 0.001 '**' 0.01 '*' 0.05 '.' 0.1 ' ' 1
```

```
lsmeans_species_sr <- LSD.test(md_7, "species", p.adj="none" )
lsmeans_species_sr
```

```
## $statistics
##   MSerror Df      Mean      CV
## 1482219 220 16221.64 7.505185
##
## $parameters
##           test p.adjusted name.t ntr alpha
## Fisher-LSD      none species   6 0.05
##
## $means
##           sr      std   r      LCL      UCL      Min      Max      Q25
## cau 15916.41 999.2097 106 15683.36 16149.46 11787.83 18601.75 14961.58
## cru 17678.38 1345.0603  23 17178.08 18178.69 13692.25 19452.83 17724.42
## hdus 15208.39 1716.7614  29 14762.83 15653.94 12427.17 19654.75 14333.83
## hybr 16533.92 1530.9086  15 15914.40 17153.44 14288.00 19384.33 15261.62
## hypo 17669.48  709.5543  31 17238.53 18100.42 15909.75 18472.50 17256.25
## quit 15251.95 1558.5838  22 14740.40 15763.51 11787.83 17525.42 14095.31
##           Q50      Q75
## cau 15873.75 16572.17
## cru 17947.42 18136.88
## hdus 15065.50 15873.75
## hybr 16561.75 17350.92
## hypo 17840.83 18093.79
## quit 15607.00 16492.19
##
## $comparison
## NULL
##
## $groups
##           sr groups
## cru 17678.38      a
## hypo 17669.48      a
## hybr 16533.92      b
## cau 15916.41      b
## quit 15251.95      c
## hdus 15208.39      c
##
## attr(,"class")
## [1] "group"
```

## D. Elevation

```
ggdensity(data_species$elevation,  
  main = "Density plot of elevation",  
  xlab = "Elavations of the genotypes country of origin")
```

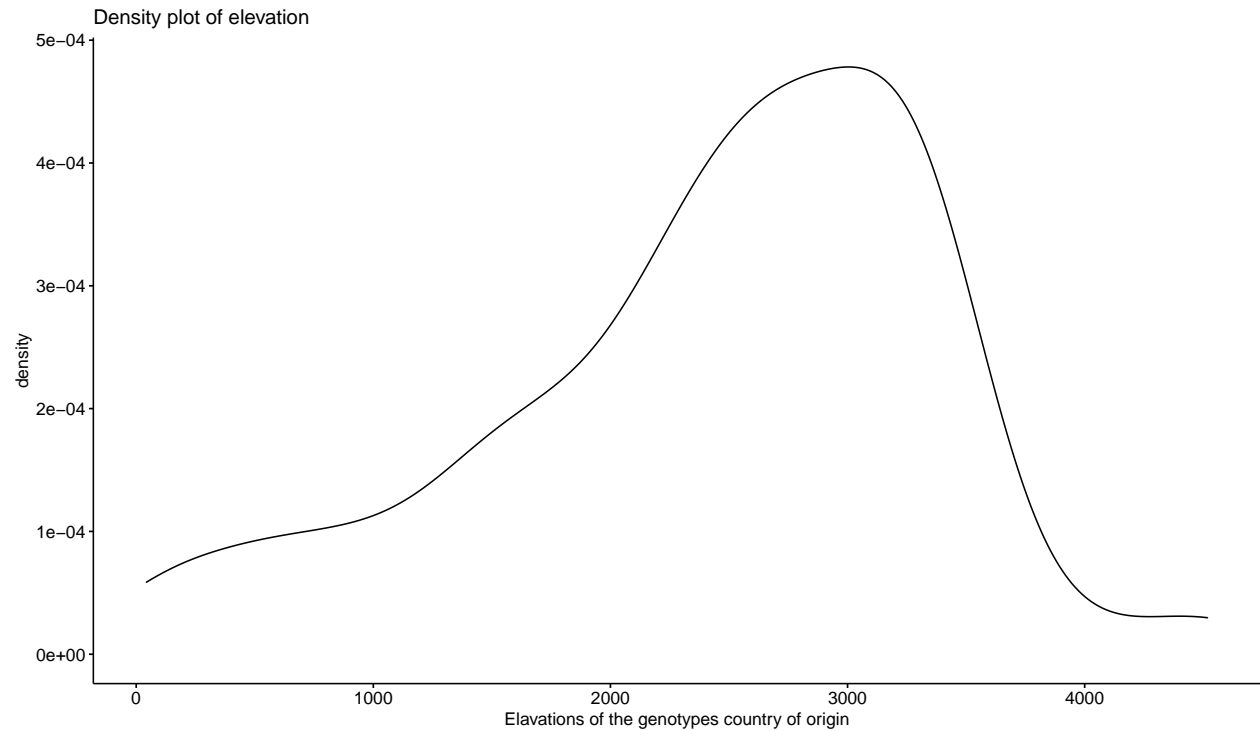

```
ggplot(data = data_species, mapping = aes(x = species, y = elevation)) +  
  geom_boxplot(outlier.size = -1)+geom_jitter(position=position_jitter(0.2), size=0.4)
```

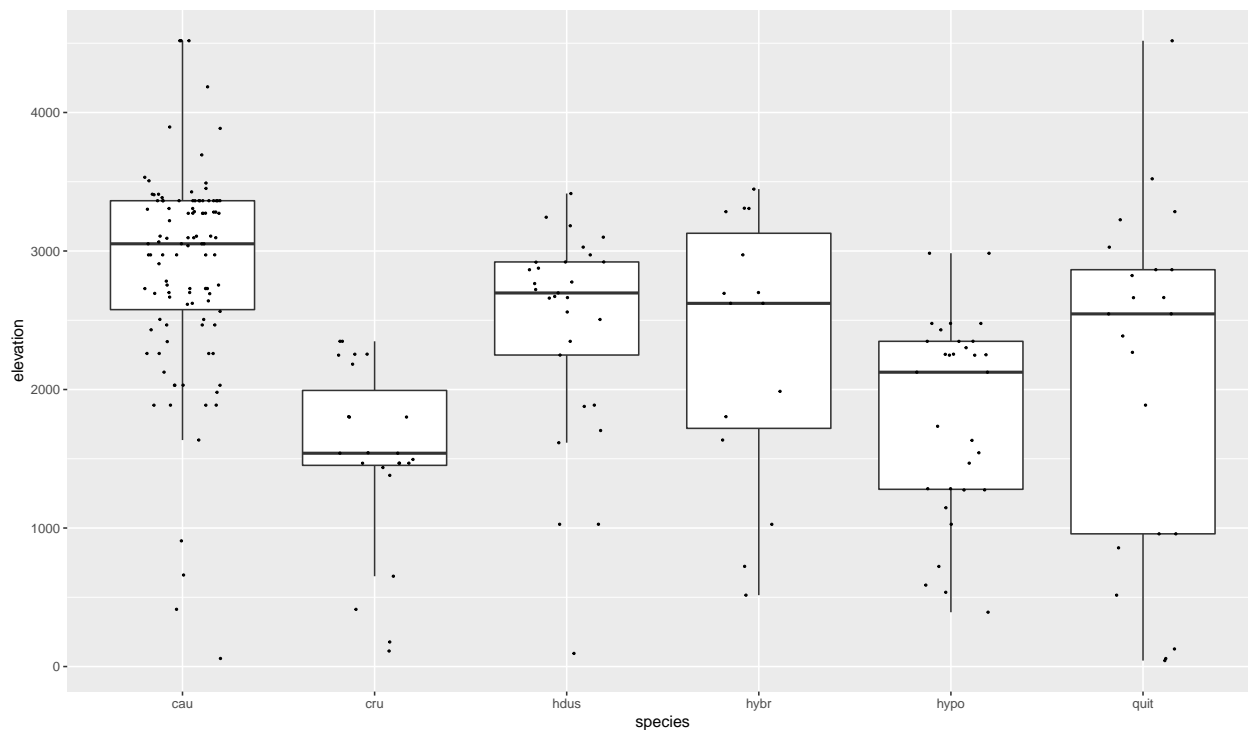

```
md_8 <-glm(elevation ~ species , data = data_species, family = gaussian)
summary(md_8)
```

```
##
## Call:
## glm(formula = elevation ~ species, family = gaussian, data = data_species)
##
## Deviance Residuals:
##      Min       1Q   Median       3Q      Max
## -2830.6   -412.6    206.5    474.4   2399.6
##
## Coefficients:
##              Estimate Std. Error t value Pr(>|t|)
## (Intercept)  2888.58     78.86  36.628 < 2e-16 ***
## speciescru  -1357.97    186.77  -7.271 6.18e-12 ***
## specieshdus  -430.09    170.15  -2.528  0.0122 *
## specieshybr  -578.71    223.98  -2.584  0.0104 *
## specieshypo -1063.09    165.79  -6.412 8.63e-10 ***
## speciesquit  -770.17    190.22  -4.049 7.14e-05 ***
## ---
## Signif. codes:  0 '***' 0.001 '**' 0.01 '*' 0.05 '.' 0.1 ' ' 1
##
## (Dispersion parameter for gaussian family taken to be 659244.6)
##
##      Null deviance: 199626032  on 225  degrees of freedom
## Residual deviance: 145033821  on 220  degrees of freedom
## (28 observations deleted due to missingness)
## AIC: 3677.4
##
## Number of Fisher Scoring iterations: 2
```

```

lrtest(md_8)

## Likelihood ratio test
##
## Model 1: elevation ~ species
## Model 2: elevation ~ 1
##   #Df LogLik Df  Chisq Pr(>Chisq)
## 1    7 -1831.7
## 2    2 -1867.8 -5 72.202  3.565e-14 ***
## ---
## Signif. codes:  0 '***' 0.001 '**' 0.01 '*' 0.05 '.' 0.1 ' ' 1

lsmeans_species_elevation <- LSD.test(md_8, "species", p.adj="none" )
lsmeans_species_elevation

## $statistics
##      MSerror Df      Mean      CV
## 659244.6 220 2435.982 33.33106
##
## $parameters
##      test p.adjusted name.t ntr alpha
## Fisher-LSD      none species 6 0.05
##
## $means
##      elevation      std    r      LCL      UCL Min  Max      Q25  Q50      Q75
## cau  2888.575  738.9232 106 2733.153 3043.998  58 4518 2576.75 3052 3363.0
## cru  1530.609  655.7926  23 1196.949 1864.268 112 2348 1452.50 1540 1993.5
## hdus 2458.483  760.1605  29 2161.338 2755.628  95 3415 2249.00 2697 2921.0
## hybr 2309.867  977.1904  15 1896.704 2723.030 515 3447 1719.50 2622 3128.0
## hypo 1825.484  717.9926  31 1538.084 2112.884 392 2984 1279.50 2125 2348.0
## quit 2118.409 1257.8891  22 1777.251 2459.567  43 4518  958.00 2546 2865.0
##
## $comparison
## NULL
##
## $groups
##      elevation groups
## cau  2888.575      a
## hdus 2458.483      b
## hybr 2309.867     bc
## quit 2118.409     bc
## hypo 1825.484     cd
## cru  1530.609      d
##
## attr(,"class")
## [1] "group"

```

## E. Latitude

```

ggdensity(data_species$latitude,
  main = "Density plot of latitude",
  xlab = "Latitudess of the genotypes country of origin")

```

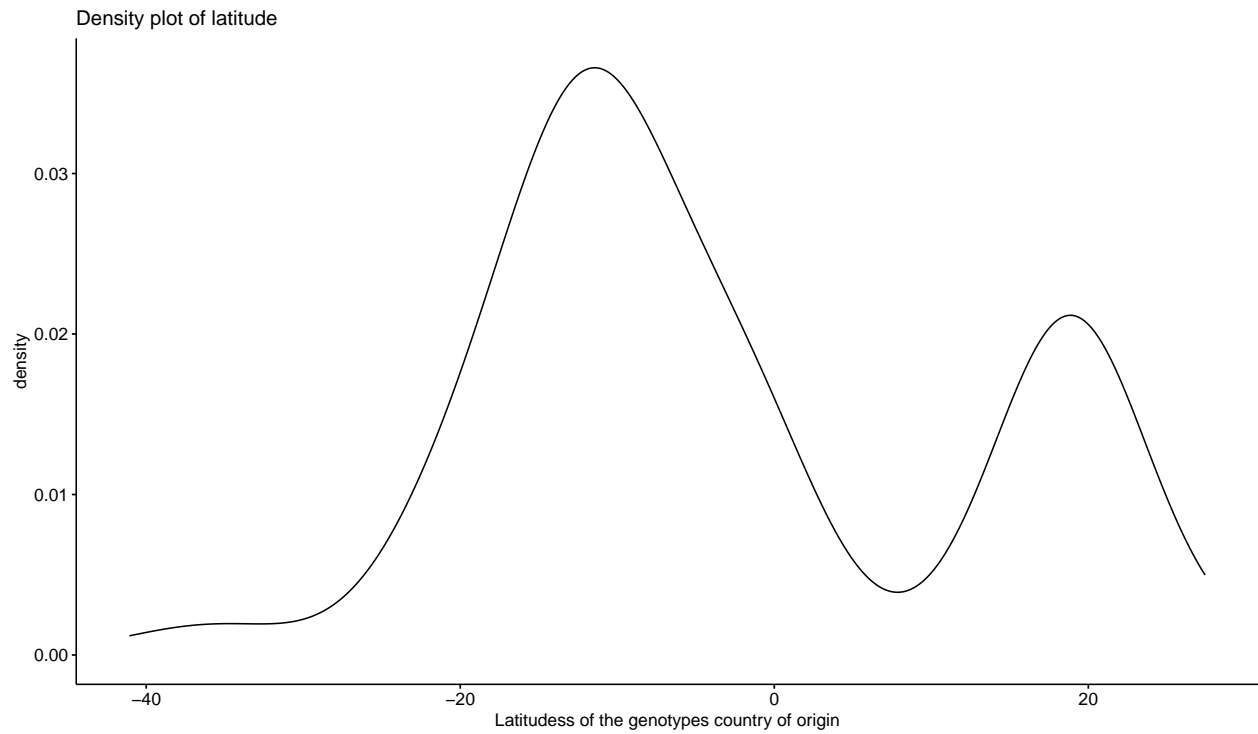

```
ggplot(data = data_species, mapping = aes(x = species, y = latitude)) +  
  geom_boxplot(outlier.size = -1)+geom_jitter(position=position_jitter(0.2), size=0.4)
```

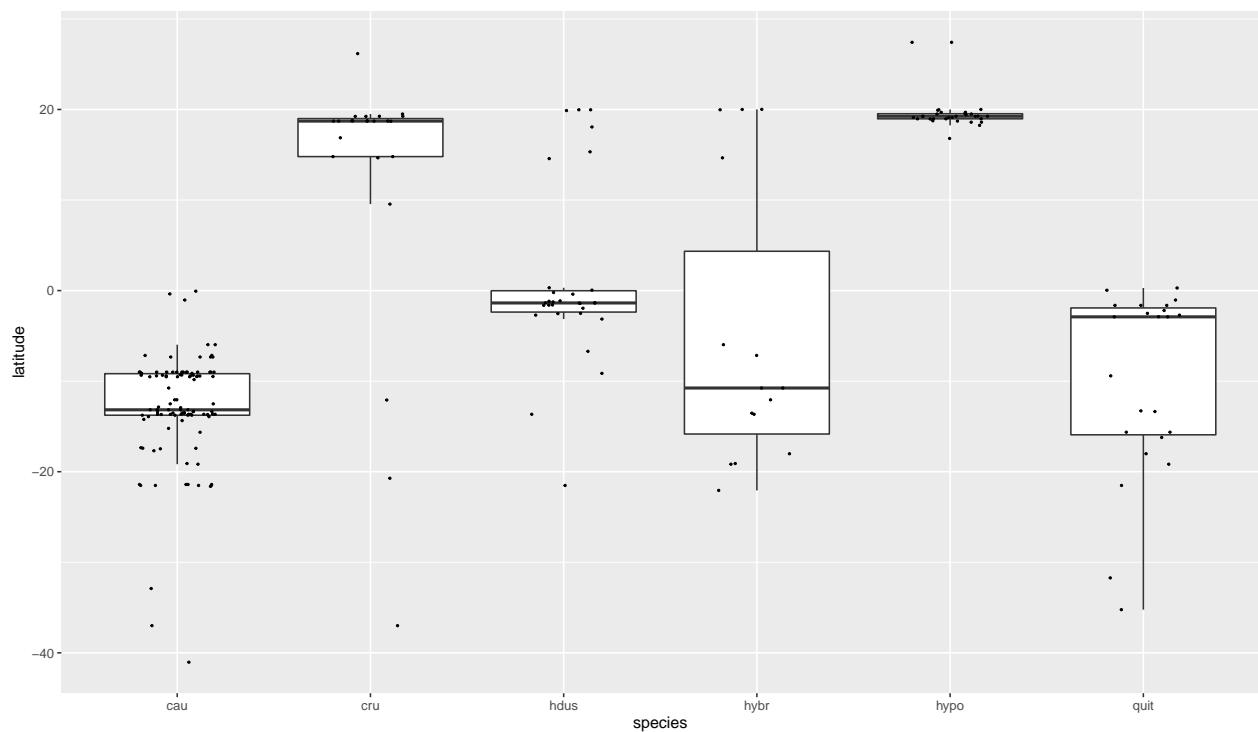

```
md_9 <-glm(latitude ~ species , data = data_species, family = gaussian)  
summary(md_9)
```

```
##  
## Call:
```



```
## glm(formula = latitude ~ species, family = gaussian, data = data_species)
##
## Deviance Residuals:
##      Min       1Q   Median       3Q      Max
## -49.698  -2.332  -0.409   3.931  25.187
##
## Coefficients:
##              Estimate Std. Error t value Pr(>|t|)
## (Intercept) -12.9305     0.8611 -15.016 < 2e-16 ***
## speciescru   25.6286     2.0393  12.567 < 2e-16 ***
## specieshdus  13.8769     1.8334   7.569 9.97e-13 ***
## specieshybr   7.7557     2.4457   3.171 0.00173 **
## specieshypo  32.5897     1.8103  18.003 < 2e-16 ***
## speciesquit   2.8905     2.0393   1.417 0.15778
## ---
## Signif. codes:  0 '***' 0.001 '**' 0.01 '*' 0.05 '.' 0.1 ' ' 1
##
## (Dispersion parameter for gaussian family taken to be 78.60063)
##
##      Null deviance: 51146  on 227  degrees of freedom
## Residual deviance: 17449  on 222  degrees of freedom
## (26 observations deleted due to missingness)
## AIC: 1650
##
## Number of Fisher Scoring iterations: 2
```

```
lrtest(md_9)
```

```
## Likelihood ratio test
##
## Model 1: latitude ~ species
## Model 2: latitude ~ 1
##   #Df LogLik Df  Chisq Pr(>Chisq)
## 1    7 -818.02
## 2    2 -940.61 -5 245.19 < 2.2e-16 ***
## ---
## Signif. codes:  0 '***' 0.001 '**' 0.01 '*' 0.05 '.' 0.1 ' ' 1
```

```
lsmeans_species_latitude <- LSD.test(md_9, "species", p.adj="none" )
lsmeans_species_latitude
```

```
## $statistics
##      MSerror Df      Mean      CV
##    78.60063 222 -3.286399 -269.7694
##
## $parameters
##      test p.adjusted name.t ntr alpha
## Fisher-LSD      none species    6 0.05
##
## $means
##      latitude      std    r      LCL      UCL      Min      Max
## cau -12.9305355  6.053224 106 -14.627537 -11.2335339 -41.03454 -0.063325
## cru  12.6980219 15.025957  23  9.054921  16.3411232 -36.99958 26.166667
## hdus  0.9463838  9.778241  30 -2.243498  4.1362652 -21.51777 19.966667
## hybr -5.1748345 15.560844  15 -9.686008 -0.6636609 -22.06622 20.012118
```

```
## hypo 19.6591845 2.154195 31 16.521175 22.7971945 16.80000 27.416667
## quit -10.0400192 10.297513 23 -13.683121 -6.3969179 -35.23390 0.287972
##          Q25          Q50          Q75
## cau -13.761848 -13.164547 -9.17521950
## cru 14.796239 18.716667 18.99452400
## hdus -2.371932 -1.364866 -0.01530725
## hybr -15.838098 -10.759094 4.34273750
## hypo 18.966667 19.250000 19.52897500
## quit -15.925000 -2.899469 -1.91589850
##
## $comparison
## NULL
##
## $groups
##      latitude groups
## hypo 19.6591845    a
## cru 12.6980219    b
## hdus 0.9463838    c
## hybr -5.1748345    d
## quit -10.0400192   de
## cau -12.9305355    e
##
## attr("class")
## [1] "group"
```

## F. Longitude

```
ggdensity(data_species$longitude,
          main = "Density plot of longitude",
          xlab = "Longitudes of the genotypes country of origin")
```

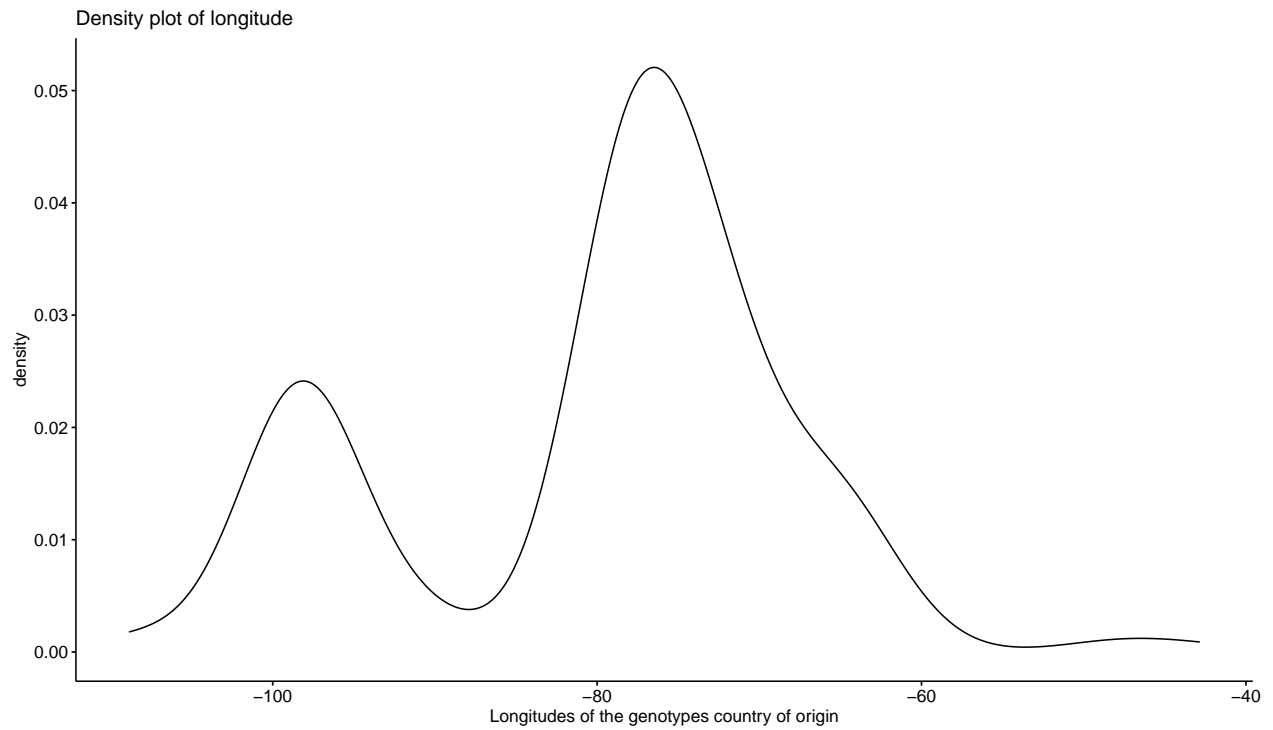

```
ggplot(data = data_species, mapping = aes(x = species, y = longitude)) +
  geom_boxplot(outlier.size = -1)+geom_jitter(position=position_jitter(0.2), size=0.4)
```

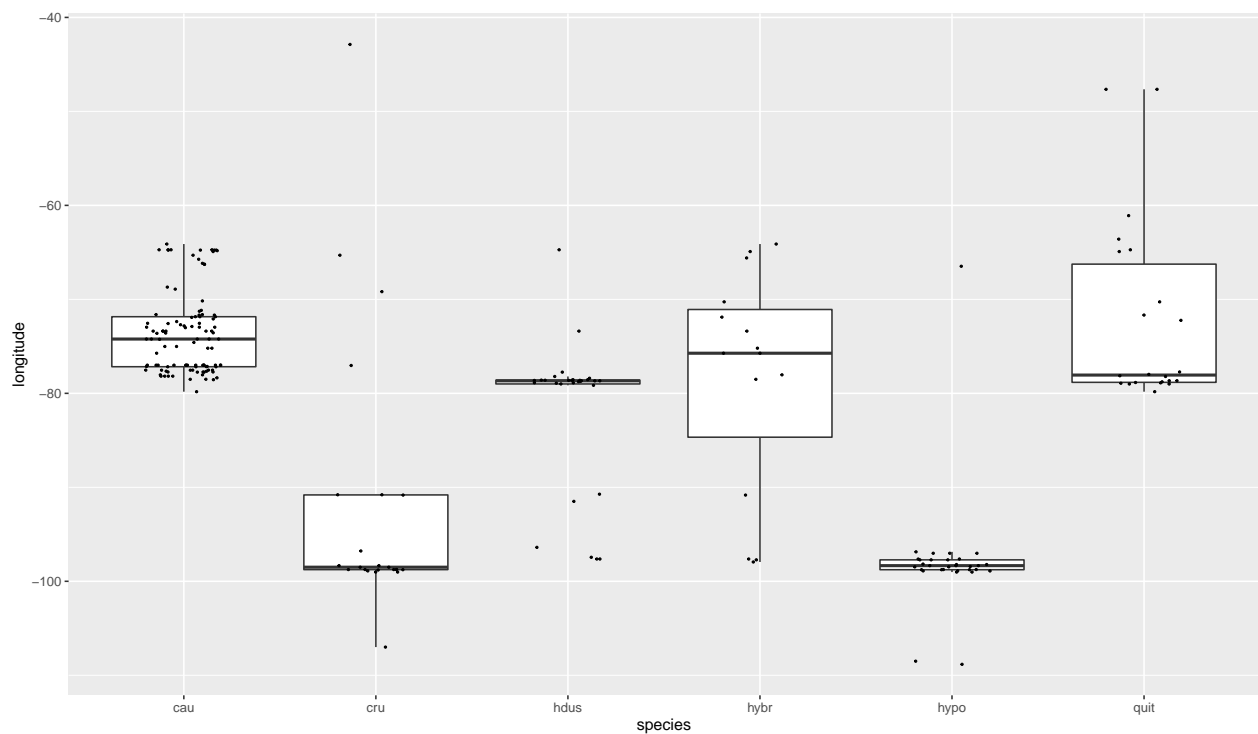

```
md_10 <-glm(longitude ~ species , data = data_species, family = gaussian)
summary(md_10)
```

```
##
## Call:
```

```
## glm(formula = longitude ~ species, family = gaussian, data = data_species)
##
## Deviance Residuals:
##      Min       1Q   Median       3Q      Max
## -19.447   -4.046   -0.416    2.625   48.972
##
## Coefficients:
##              Estimate Std. Error t value Pr(>|t|)
## (Intercept) -73.6599     0.7673  -95.994 < 2e-16 ***
## speciescru  -18.1875     1.8173  -10.008 < 2e-16 ***
## specieshdus  -7.7483     1.6556   -4.680 5.01e-06 ***
## specieshybr  -4.8382     2.1794   -2.220 0.0274 *
## specieshypo -24.1986     1.6131  -15.001 < 2e-16 ***
## speciesquit  1.5494     1.8509    0.837 0.4034
## ---
## Signif. codes:  0 '***' 0.001 '**' 0.01 '*' 0.05 '.' 0.1 ' ' 1
##
## (Dispersion parameter for gaussian family taken to be 62.414)
##
##      Null deviance: 32568  on 225  degrees of freedom
## Residual deviance: 13731  on 220  degrees of freedom
## (28 observations deleted due to missingness)
## AIC: 1583.5
##
## Number of Fisher Scoring iterations: 2
```

```
lrtest(md_10)
```

```
## Likelihood ratio test
##
## Model 1: longitude ~ species
## Model 2: longitude ~ 1
##   #Df LogLik Df  Chisq Pr(>Chisq)
## 1    7 -784.76
## 2    2 -882.35 -5 195.19 < 2.2e-16 ***
## ---
## Signif. codes:  0 '***' 0.001 '**' 0.01 '*' 0.05 '.' 0.1 ' ' 1
```

```
lsmeans_species_longitude <- LSD.test(md_10, "species", p.adj="none" )
lsmeans_species_longitude
```

```
## $statistics
##      MSerror Df      Mean      CV
##      62.414 220 -79.99466 -9.875977
##
## $parameters
##      test p.adjusted name.t ntr alpha
## Fisher-LSD      none species 6 0.05
##
## $means
##      longitude      std  r      LCL      UCL      Min      Max
## cau  -73.65988  4.356625 106  -75.17216 -72.14760 -79.82561 -64.11433
## cru  -91.84738 14.698078  23  -95.09392 -88.60084 -107.00000 -42.87518
## hdus  -81.40820  7.796249  29  -84.29945 -78.51695  -97.62778 -64.72605
## hybr  -78.49813 11.914513  15  -82.51825 -74.47801  -97.94471 -64.11433
```

```
## hypo -97.85852 6.412741 31 -100.65495 -95.06209 -108.83333 -66.47890
## quit -72.11049 9.910231 22 -75.43000 -68.79099 -79.82561 -47.65000
##           Q25           Q50           Q75
## cau  -77.16731 -74.22260 -71.84630
## cru  -98.75833 -98.50000 -90.80932
## hdus -79.00128 -78.66724 -78.59322
## hybr -84.66627 -75.73134 -71.07873
## hypo -98.76667 -98.33414 -97.71667
## quit -78.82909 -78.05610 -66.25272
##
## $comparison
## NULL
##
## $groups
##      longitude groups
## quit -72.11049      a
## cau  -73.65988      a
## hybr -78.49813      b
## hdus -81.40820      b
## cru  -91.84738      c
## hypo -97.85852      d
##
## attr("class")
## [1] "group"
```

- It should be determined how to divide the accessions into different latitudinal groups.

```
prelim_plot <- ggplot(data, aes(x = longitude, y = latitude, colour = species)) +
  geom_point()
```

```
prelim_plot
```

```
## Warning: Removed 28 rows containing missing values (geom_point).
```

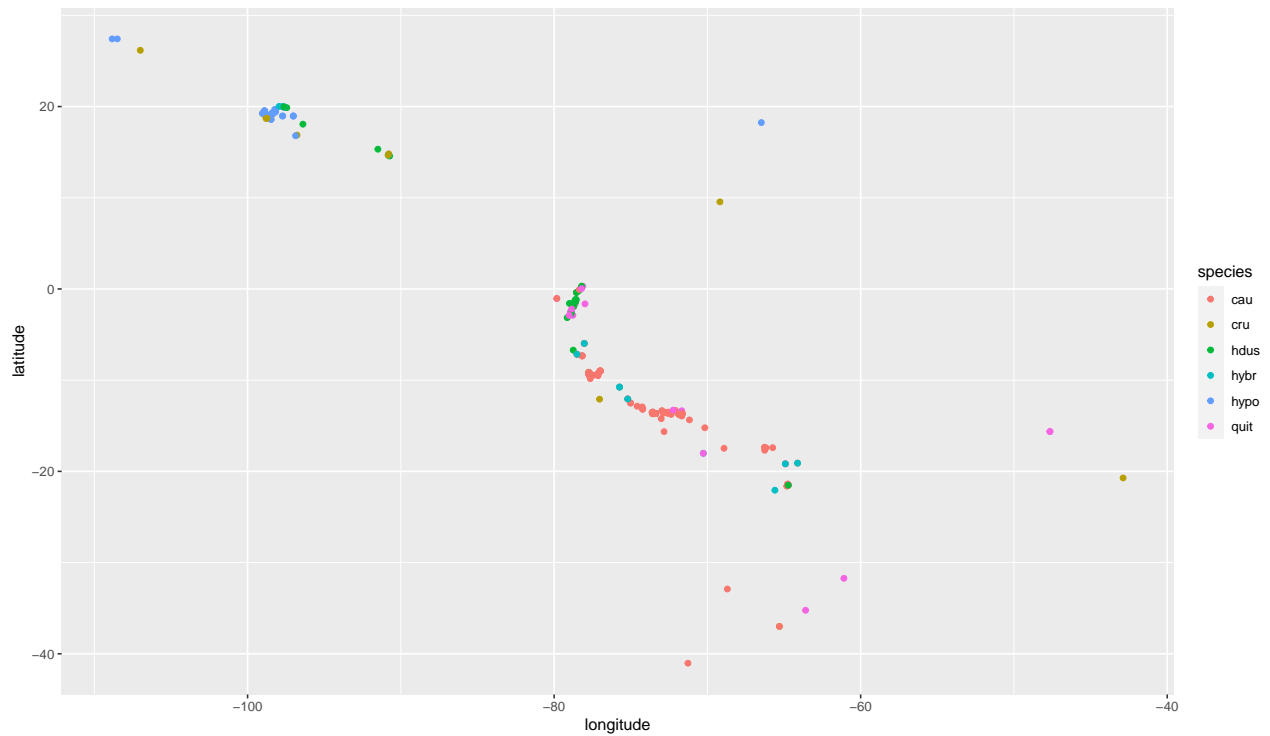

```
world <- getMap(resolution = "low")

with_world <- ggplot() +
  geom_polygon(data = world,
    aes(x = long, y = lat, group = group),
    fill = NA, colour = "black") +
  geom_point(data = data, # Add and plot species data
    aes(x = longitude, y = latitude,
      colour = species)) +
  coord_quickmap() + # Prevents stretching when resizing
  theme_classic() + # Remove ugly grey background
  xlab("Longitude") +
  ylab("Latitude") +
  guides(colour=guide_legend(title="Species"))
```

```
## Regions defined for each Polygons
```

```
with_world
```

```
## Warning: Removed 28 rows containing missing values (geom_point).
```

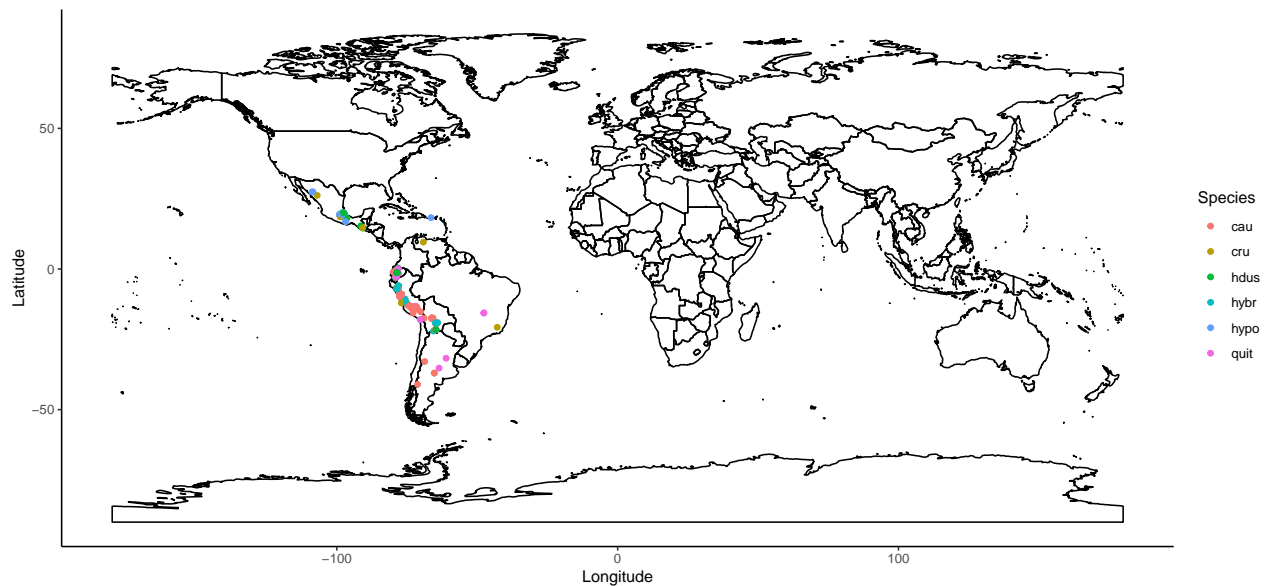

I need a smaller map, focused on the Latin America.

```
mapa <- borders("world", regions = c("Brazil", "Uruguay", "Argentina", "French Guiana", "Suriname", "Colombia",
  "Bolivia", "Ecuador", "Chile", "Paraguay", "Peru", "Guyana", "Panama",
  "Nicaragua", "Honduras", "El Salvador", "Belize", "Guatemala", "Mexico",
  "Caribe", "Puerto Rico", "Dominican Republic", "Haiti", "Jamaica",
  "Dominica", "Saba", "United States of America"),
  fill = "grey70", colour = "black")
```

Filtering the accessions without missing coordinate values

```
data_complete_coordinates <- filter(data, !(longitude=="NA" | latitude=="NA"))
dim(data_complete_coordinates)
```

```
## [1] 226 14
```

```
#data_complete_coordinates
sum(is.na(data_complete_coordinates$longitude))
```

```
## [1] 0
```

226 genotypes will be shown on the map

First let's look at the coordinates

```
ggplot(data_complete_coordinates, aes(x = longitude, y = latitude, colour = species)) +
  geom_point()
```

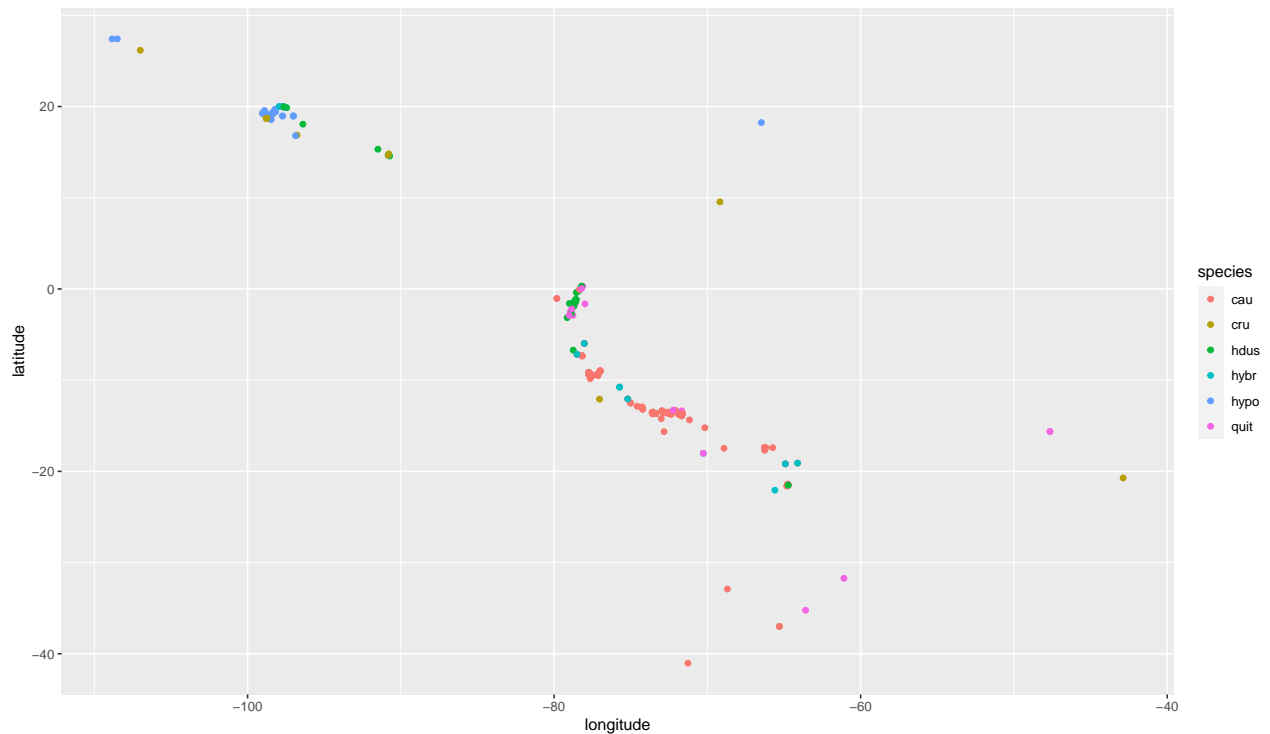

```
table(data_complete_coordinates$country)
```

```
##
```

```
## ARG BOL BRA ECU GTM MEX PER PTR VEN
```

```
##   6  21   3  33   6  53 102   1   1
```

```
map1 <- ggplot() + mapa + theme_bw() + xlab("Longitude (decimals)") + ylab("Latitude (decimals)") +
  theme(panel.border = element_blank(), panel.grid.major = element_line(colour = "grey80"), panel
  geom_point(data = data, # Add and plot species data
    aes(x = longitude, y = latitude,
        colour = species)) +
  coord_quickmap() + # Prevents stretching when resizing
  theme_bw() + # Remove ugly grey background
  xlab("Longitude") +
  ylab("Latitude") +
  guides(colour=guide_legend(title="Species"))+
  theme(legend.position="none")
```

```
map2<- ggplot() + mapa + theme_bw() + xlab("Longitude (decimals)") + ylab("Latitude (decimals)") +
  theme(panel.border = element_blank(), panel.grid.major = element_line(colour = "grey80"), panel
  geom_point(data = data, # Add and plot species data
    aes(x = longitude, y = latitude), color="blue") +
  coord_quickmap() + # Prevents stretching when resizing
  #theme_classic() + # Remove ugly grey background
  theme_bw() +
  xlab("Longitude") +
  ylab("Latitude")
```

Filtering the South American accessions.



```
filter(data, country=="VEN")
```

```
##   genotypes species country plot seed_setting ft_adjusted ph_adjusted longitude
## 1 cru_72_n    cru      VEN 508           1          110          NA -69.18047
##   latitude elevation      prec      temp      sr GDD10c
## 1 9.550365      177 99.41667 26.91667 16881      967
```

```
south_american_genotypes <-filter(data_complete_coordinates, latitude < 9.56 )
dim(south_american_genotypes)
```

```
## [1] 166 14
```

```
summary(south_american_genotypes)
```

```
##   genotypes      species      country      plot
## Length:166      Length:166      Length:166      Min.   : 102.0
## Class :character Class :character Class :character 1st Qu.: 319.2
## Mode  :character Mode  :character Mode  :character Median : 602.5
##                                           Mean  : 566.4
##                                           3rd Qu.: 818.5
##                                           Max.   :1028.0
##
##   seed_setting      ft_adjusted      ph_adjusted      longitude
## Min.   :0.00000      Min.   : 50.0      Min.   :107.2      Min.   : -79.83
## 1st Qu.:0.00000      1st Qu.:102.0      1st Qu.:204.2      1st Qu.: -78.03
## Median :0.00000      Median :110.0      Median :231.2      Median : -75.73
## Mean   :0.04217      Mean   :108.3      Mean   :229.6      Mean   : -73.68
## 3rd Qu.:0.00000      3rd Qu.:113.0      3rd Qu.:257.9      3rd Qu.: -71.85
## Max.   :1.00000      Max.   :160.0      Max.   :359.9      Max.   : -42.88
##
##           NA's      :2           NA's      :11
##   latitude      elevation      prec      temp
## Min.   : -41.035      Min.   :  43      Min.   :  0.50      Min.   :  3.60
## 1st Qu.: -13.760      1st Qu.:2466      1st Qu.: 52.25      1st Qu.:12.58
## Median : -10.759      Median :2870      Median : 61.17      Median :13.77
## Mean   : -11.309      Mean   :2694      Mean   : 65.52      Mean   :14.26
## 3rd Qu.:  -7.205      3rd Qu.:3283      3rd Qu.: 70.31      3rd Qu.:16.65
## Max.   :   9.550      Max.   :4518      Max.   :344.00      Max.   :26.92
##
##           sr      GDD10c
## Min.   :11788      Min.   : 416.1
## 1st Qu.:14869      1st Qu.: 884.4
## Median :15701      Median : 967.0
## Mean   :15639      Mean   : 937.8
## 3rd Qu.:16570      3rd Qu.: 984.9
## Max.   :19178      Max.   :1196.2
##
##           NA's      :2
```

Dividing South American accessions into two groups using the median value.

```
mean(south_american_genotypes$latitude)
```

```
## [1] -11.30898
```

```
sa_1 <-filter(south_american_genotypes, latitude >= median(south_american_genotypes$latitude))
sa_2 <-filter(south_american_genotypes, latitude < median(south_american_genotypes$latitude))
```

```
dim(sa_1)
```

```
## [1] 84 14
dim(sa_2)

## [1] 82 14
range(sa_1$latitude)

## [1] -10.759094  9.550365
range(sa_2$latitude)

## [1] -41.03454 -12.06110
  • Central American group
ca <- filter(data_complete_coordinates, latitude > 9.56)
dim(ca)

## [1] 60 14
summary(ca)

##      genotypes      species      country      plot
## Length:60      Length:60      Length:60      Min.   : 106.0
## Class :character Class :character Class :character 1st Qu.: 323.0
## Mode  :character Mode  :character Mode  :character Median : 523.5
##                                     Mean   : 573.1
##                                     3rd Qu.: 813.5
##                                     Max.   :1027.0
##
##      seed_setting      ft_adjusted      ph_adjusted      longitude
## Min.   :0.0000      Min.   : 70.0      Min.   :129.2      Min.   : -108.83
## 1st Qu.:0.0000      1st Qu.: 76.0      1st Qu.:176.2      1st Qu.: -98.77
## Median :0.0000      Median :102.0      Median :212.2      Median : -98.33
## Mean   :0.4333      Mean   :107.2      Mean   :208.7      Mean   : -97.45
## 3rd Qu.:1.0000      3rd Qu.:138.0      3rd Qu.:233.2      3rd Qu.: -97.63
## Max.   :1.0000      Max.   :160.0      Max.   :318.2      Max.   : -66.48
##                                     NA's   :8      NA's   :5
##      latitude      elevation      prec      temp
## Min.   :14.57      Min.   : 95      Min.   : 45.83      Min.   :11.28
## 1st Qu.:18.72      1st Qu.:1356      1st Qu.: 64.33      1st Qu.:15.89
## Median :19.12      Median :1719      Median : 74.42      Median :17.47
## Mean   :19.07      Mean   :1722      Mean   : 91.29      Mean   :18.49
## 3rd Qu.:19.51      3rd Qu.:2254      3rd Qu.:113.25      3rd Qu.:21.78
## Max.   :27.42      Max.   :2984      Max.   :283.33      Max.   :25.79
##
##      sr      GDD10c
## Min.   :15910      Min.   : 594.9
## 1st Qu.:17264      1st Qu.: 663.6
## Median :17858      Median : 884.4
## Mean   :17833      Mean   : 888.9
## 3rd Qu.:18203      3rd Qu.:1113.5
## Max.   :19655      Max.   :1196.2
##                                     NA's   :8
```

Let's show the three different latitudinal groups (ca, sa\_1 and sa\_2) on the map

```

ca$latgroup <- "ca"
sa_1$latgroup <- "sa1"
sa_2$latgroup <- "sa2"
accessions_grouped_by_latitude <- rbind(ca, sa_1, sa_2)
data_gbl <- accessions_grouped_by_latitude
#dim(data2)
data_gbl

```

|       | genotypes  | species | country | plot | seed_setting | ft_adjusted | ph_adjusted |
|-------|------------|---------|---------|------|--------------|-------------|-------------|
| ## 1  | cru_78_y   | cru     | MEX     | 106  | 1            | 70          | 187.95      |
| ## 2  | hypo_157_y | hypo    | MEX     | 109  | 0            | 137         | 223.95      |
| ## 3  | hypo_158_y | hypo    | MEX     | 112  | 1            | 101         | 265.95      |
| ## 4  | cru_100_y  | cru     | MEX     | 116  | 1            | 70          | 176.95      |
| ## 5  | hypo_174   | hypo    | MEX     | 128  | 0            | 140         | 235.70      |
| ## 6  | hypo_146_y | hypo    | MEX     | 201  | 0            | 146         | 230.20      |
| ## 7  | hypo_148_y | hypo    | MEX     | 202  | 0            | 138         | NA          |
| ## 8  | hypo_170_n | hypo    | MEX     | 214  | 0            | 160         | 198.20      |
| ## 9  | hybr_118_n | hybr    | MEX     | 217  | 0            | 160         | 197.20      |
| ## 10 | cru_89_y   | cru     | MEX     | 220  | 0            | NA          | 229.20      |
| ## 11 | hypo_159_y | hypo    | MEX     | 225  | 0            | 138         | 226.20      |
| ## 12 | cru_101_y  | cru     | MEX     | 305  | 1            | 76          | 202.20      |
| ## 13 | hypo_153_y | hypo    | MEX     | 306  | 1            | 117         | 318.20      |
| ## 14 | hypo_141_y | hypo    | MEX     | 316  | 0            | 134         | 233.20      |
| ## 15 | cru_77_y   | cru     | MEX     | 317  | 1            | 71          | 153.20      |
| ## 16 | cru_76_y   | cru     | MEX     | 325  | 1            | 71          | 156.20      |
| ## 17 | hypo_165_n | hypo    | MEX     | 401  | 0            | 151         | 239.20      |
| ## 18 | hypo_168_n | hypo    | MEX     | 408  | 0            | 151         | NA          |
| ## 19 | cru_91_y   | cru     | GTM     | 412  | 1            | 82          | NA          |
| ## 20 | cru_93_y   | cru     | MEX     | 419  | 1            | 89          | 209.20      |
| ## 21 | hdus_124_y | hdus    | GTM     | 420  | 1            | 89          | 231.20      |
| ## 22 | hybr_119_y | hybr    | MEX     | 426  | 0            | 102         | 195.20      |
| ## 23 | cru_92_y   | cru     | MEX     | 503  | 0            | 113         | 212.20      |
| ## 24 | hypo_160_y | hypo    | MEX     | 504  | 1            | 92          | 180.20      |
| ## 25 | hypo_166_n | hypo    | MEX     | 506  | 0            | 138         | 225.20      |
| ## 26 | hypo_143_y | hypo    | MEX     | 512  | 0            | 125         | 213.20      |
| ## 27 | hypo_167_n | hypo    | MEX     | 513  | 1            | 92          | 229.20      |
| ## 28 | hypo_149_n | hypo    | PTR     | 515  | 1            | 82          | 129.20      |
| ## 29 | hdus_137_n | hdus    | MEX     | 516  | 1            | 71          | 228.20      |
| ## 30 | cru_70_y   | cru     | MEX     | 522  | 1            | 71          | 142.20      |
| ## 31 | hypo_145_y | hypo    | MEX     | 525  | 0            | 102         | 172.20      |
| ## 32 | hypo_144_y | hypo    | MEX     | 527  | 0            | 113         | 190.20      |
| ## 33 | hypo_150_n | hypo    | MEX     | 612  | 0            | 110         | NA          |
| ## 34 | hypo_156_y | hypo    | MEX     | 614  | 0            | 110         | 222.20      |
| ## 35 | hypo_142_y | hypo    | MEX     | 619  | 0            | 146         | 283.20      |
| ## 36 | cru_68_y   | cru     | MEX     | 620  | 1            | 71          | 162.20      |
| ## 37 | cru_98_y   | cru     | MEX     | 624  | 1            | 71          | 165.20      |
| ## 38 | hypo_169_n | hypo    | MEX     | 626  | 1            | 97          | 228.20      |
| ## 39 | cru_74_y   | cru     | GTM     | 627  | 1            | 76          | NA          |
| ## 40 | hypo_172_n | hypo    | MEX     | 714  | 0            | NA          | 249.20      |
| ## 41 | hypo_164_n | hypo    | MEX     | 715  | 0            | 142         | 257.20      |
| ## 42 | hybr_109_y | hybr    | MEX     | 725  | 0            | NA          | 154.20      |
| ## 43 | hdus_130_y | hdus    | MEX     | 728  | 1            | 110         | 186.20      |
| ## 44 | hybr_121_n | hybr    | GTM     | 801  | 0            | NA          | 206.20      |
| ## 45 | hypo_152_n | hypo    | MEX     | 812  | 0            | 138         | 263.20      |

|       |            |      |     |      |   |     |        |
|-------|------------|------|-----|------|---|-----|--------|
| ## 46 | cru_94_y   | cru  | MEX | 818  | 1 | 71  | 169.20 |
| ## 47 | cru_82_n   | cru  | MEX | 822  | 1 | 71  | 163.20 |
| ## 48 | cru_79_y   | cru  | MEX | 904  | 1 | 76  | 181.20 |
| ## 49 | hypo_154_y | hypo | MEX | 905  | 1 | 102 | 252.20 |
| ## 50 | hypo_155_n | hypo | MEX | 909  | 0 | 146 | 233.20 |
| ## 51 | cru_86_n   | cru  | MEX | 1001 | 1 | 72  | 167.45 |
| ## 52 | hypo_147_y | hypo | MEX | 1006 | 0 | 126 | 249.45 |
| ## 53 | hdus_136_y | hdus | MEX | 1010 | 0 | NA  | 195.45 |
| ## 54 | hypo_151_y | hypo | MEX | 1012 | 0 | 152 | 253.45 |
| ## 55 | hypo_140_y | hypo | MEX | 1014 | 0 | NA  | 224.45 |
| ## 56 | hdus_132_n | hdus | GTM | 1016 | 0 | NA  | 234.45 |
| ## 57 | cru_88_y   | cru  | GTM | 1017 | 1 | 83  | 166.45 |
| ## 58 | cru_95_y   | cru  | MEX | 1019 | 0 | 72  | 166.45 |
| ## 59 | hypo_162_y | hypo | MEX | 1021 | 0 | 139 | 239.45 |
| ## 60 | hdus_135_y | hdus | MEX | 1027 | 0 | NA  | 175.45 |
| ## 61 | cau_339_y  | cau  | PER | 102  | 0 | 124 | 234.95 |
| ## 62 | cau_281_y  | cau  | PER | 110  | 0 | 88  | 229.95 |
| ## 63 | cau_27_y   | cau  | PER | 114  | 0 | 109 | 266.95 |
| ## 64 | quit_178_y | quit | ECU | 117  | 0 | 109 | 257.95 |
| ## 65 | hdus_298_y | hdus | ECU | 119  | 0 | 109 | 251.95 |
| ## 66 | cau_340_y  | cau  | PER | 121  | 0 | 116 | 191.95 |
| ## 67 | cau_354_y  | cau  | PER | 123  | 0 | 137 | 257.95 |
| ## 68 | quit_190_n | quit | ECU | 126  | 0 | 109 | 261.95 |
| ## 69 | hdus_125_y | hdus | ECU | 127  | 0 | 102 | 261.95 |
| ## 70 | hdus_122_y | hdus | PER | 204  | 0 | 113 | 125.20 |
| ## 71 | cau_316_y  | cau  | PER | 206  | 0 | 110 | 194.20 |
| ## 72 | cau_345_y  | cau  | PER | 207  | 0 | 110 | 226.20 |
| ## 73 | cau_51_y   | cau  | PER | 209  | 0 | 89  | 196.20 |
| ## 74 | hdus_123_y | hdus | PER | 210  | 0 | 110 | 247.20 |
| ## 75 | quit_280_y | quit | ECU | 211  | 0 | 110 | 214.20 |
| ## 76 | hdus_293_y | hdus | ECU | 224  | 0 | 110 | 196.20 |
| ## 77 | hybr_111_n | hybr | PER | 226  | 0 | 102 | 260.20 |
| ## 78 | cau_344_y  | cau  | PER | 227  | 0 | 102 | 226.20 |
| ## 79 | cau_330_y  | cau  | PER | 304  | 0 | 110 | 283.20 |
| ## 80 | cau_31_y   | cau  | PER | 307  | 0 | 102 | 199.20 |
| ## 81 | hdus_297_y | hdus | ECU | 311  | 0 | 110 | 257.20 |
| ## 82 | quit_180_n | quit | ECU | 319  | 0 | 110 | 249.20 |
| ## 83 | cau_43_y   | cau  | PER | 320  | 0 | 113 | 196.20 |
| ## 84 | cau_42_n   | cau  | PER | 321  | 0 | 113 | 242.20 |
| ## 85 | hdus_134_n | hdus | ECU | 322  | 0 | 102 | 263.20 |
| ## 86 | cau_56_y   | cau  | PER | 323  | 0 | 110 | 269.20 |
| ## 87 | hdus_131_y | hdus | ECU | 324  | 0 | 82  | 240.20 |
| ## 88 | hdus_138_y | hdus | ECU | 328  | 0 | 110 | 275.20 |
| ## 89 | hdus_294_y | hdus | ECU | 415  | 0 | 110 | 275.20 |
| ## 90 | hdus_302_y | hdus | ECU | 417  | 0 | 113 | 231.20 |
| ## 91 | quit_304_y | quit | ECU | 418  | 0 | 110 | 230.20 |
| ## 92 | cau_285_y  | cau  | PER | 421  | 0 | 89  | 221.20 |
| ## 93 | cau_366_y  | cau  | PER | 423  | 0 | 113 | NA     |
| ## 94 | hybr_113_n | hybr | PER | 425  | 0 | 125 | 235.20 |
| ## 95 | quit_184_y | quit | ECU | 501  | 0 | 110 | 191.20 |
| ## 96 | cau_30_y   | cau  | PER | 502  | 0 | 113 | 243.20 |
| ## 97 | cru_72_n   | cru  | VEN | 508  | 1 | 110 | NA     |
| ## 98 | cau_22_n   | cau  | PER | 509  | 0 | 113 | NA     |
| ## 99 | quit_182_n | quit | PER | 511  | 0 | 102 | 144.20 |

|        |            |      |     |      |   |     |        |
|--------|------------|------|-----|------|---|-----|--------|
| ## 100 | cau_346_y  | cau  | PER | 518  | 0 | 110 | 211.20 |
| ## 101 | cau_343_y  | cau  | PER | 519  | 0 | 89  | 169.20 |
| ## 102 | cau_341_y  | cau  | PER | 523  | 0 | 102 | 179.20 |
| ## 103 | hdus_129_y | hdus | ECU | 602  | 0 | 110 | 239.20 |
| ## 104 | cau_50_y   | cau  | PER | 606  | 0 | 102 | NA     |
| ## 105 | quit_188_n | quit | ECU | 607  | 0 | 113 | 193.20 |
| ## 106 | cau_360_y  | cau  | PER | 608  | 0 | 102 | 139.20 |
| ## 107 | cau_23_n   | cau  | PER | 613  | 0 | 102 | 242.20 |
| ## 108 | cau_13_y   | cau  | PER | 615  | 0 | 89  | 260.20 |
| ## 109 | hdus_296_y | hdus | ECU | 616  | 0 | 110 | 257.20 |
| ## 110 | cau_19_y   | cau  | PER | 618  | 0 | 110 | NA     |
| ## 111 | cau_283_y  | cau  | PER | 622  | 0 | 110 | 253.20 |
| ## 112 | cau_47_y   | cau  | ECU | 628  | 0 | 110 | 246.20 |
| ## 113 | cau_323_y  | cau  | PER | 706  | 0 | 117 | 237.20 |
| ## 114 | cau_28_y   | cau  | PER | 707  | 0 | 110 | 216.20 |
| ## 115 | cau_351_y  | cau  | PER | 726  | 0 | 102 | 199.20 |
| ## 116 | cau_325_y  | cau  | PER | 727  | 0 | 131 | 132.20 |
| ## 117 | cau_20_y   | cau  | PER | 804  | 0 | 110 | 267.20 |
| ## 118 | hdus_288_y | hdus | ECU | 807  | 0 | 110 | 262.20 |
| ## 119 | hdus_128_y | hdus | ECU | 809  | 0 | 110 | 281.20 |
| ## 120 | quit_290_y | quit | ECU | 815  | 0 | 110 | 266.20 |
| ## 121 | hybr_289_y | hybr | PER | 819  | 0 | 89  | 253.20 |
| ## 122 | cau_58_y   | cau  | PER | 823  | 0 | 102 | 216.20 |
| ## 123 | hdus_295_y | hdus | ECU | 827  | 0 | 110 | 225.20 |
| ## 124 | cau_329_y  | cau  | PER | 828  | 0 | 117 | 219.20 |
| ## 125 | cau_327_y  | cau  | PER | 906  | 0 | 102 | 186.20 |
| ## 126 | cau_342_y  | cau  | PER | 907  | 0 | 110 | 221.20 |
| ## 127 | cau_24_n   | cau  | PER | 908  | 0 | 110 | 257.20 |
| ## 128 | quit_179_n | quit | ECU | 910  | 0 | 110 | 274.20 |
| ## 129 | hdus_292_y | hdus | ECU | 911  | 0 | 110 | 289.20 |
| ## 130 | quit_194_n | quit | ECU | 914  | 0 | 110 | 270.20 |
| ## 131 | cau_326_y  | cau  | PER | 915  | 0 | 134 | 242.20 |
| ## 132 | cau_11_n   | cau  | PER | 918  | 0 | 117 | NA     |
| ## 133 | cau_60_y   | cau  | PER | 921  | 0 | 125 | 199.20 |
| ## 134 | quit_193_n | quit | ECU | 923  | 0 | 110 | 236.20 |
| ## 135 | hdus_276_y | hdus | ECU | 924  | 0 | NA  | 192.20 |
| ## 136 | hybr_110_n | hybr | PER | 926  | 0 | 110 | 195.20 |
| ## 137 | cau_359_y  | cau  | PER | 927  | 0 | 102 | 228.20 |
| ## 138 | cau_16_y   | cau  | PER | 1004 | 0 | 103 | 304.45 |
| ## 139 | hdus_300_y | hdus | ECU | 1007 | 0 | 111 | 196.45 |
| ## 140 | quit_191_n | quit | ECU | 1008 | 0 | 103 | 245.45 |
| ## 141 | cau_57_y   | cau  | ECU | 1009 | 0 | 103 | 231.45 |
| ## 142 | cau_29_n   | cau  | PER | 1013 | 0 | 111 | 213.45 |
| ## 143 | hdus_301_y | hdus | ECU | 1020 | 0 | 126 | 190.45 |
| ## 144 | hdus_299_y | hdus | ECU | 1028 | 0 | 111 | 269.45 |
| ## 145 | cau_314_y  | cau  | PER | 103  | 0 | 101 | 306.95 |
| ## 146 | cau_32_n   | cau  | PER | 108  | 0 | 109 | 291.95 |
| ## 147 | cau_59_y   | cau  | PER | 111  | 0 | 112 | 267.95 |
| ## 148 | hybr_116_y | hybr | PER | 113  | 0 | 109 | 311.95 |
| ## 149 | cau_353_n  | cau  | PER | 115  | 0 | 109 | 359.95 |
| ## 150 | quit_187_y | quit | BRA | 118  | 1 | 64  | 148.95 |
| ## 151 | cau_349_y  | cau  | PER | 120  | 0 | 116 | 261.95 |
| ## 152 | cau_17_y   | cau  | BOL | 122  | 0 | 109 | 268.95 |
| ## 153 | cau_315_y  | cau  | PER | 124  | 0 | 109 | 263.95 |

|        |            |      |     |     |   |     |        |
|--------|------------|------|-----|-----|---|-----|--------|
| ## 154 | cau_338_n  | cau  | BOL | 208 | 0 | 117 | 247.20 |
| ## 155 | cau_38_n   | cau  | PER | 212 | 0 | 113 | 194.20 |
| ## 156 | cau_361_y  | cau  | PER | 221 | 0 | NA  | 199.20 |
| ## 157 | cau_34_y   | cau  | PER | 228 | 0 | 110 | 210.20 |
| ## 158 | cau_64_y   | cau  | BOL | 301 | 0 | 103 | 300.20 |
| ## 159 | quit_279_y | quit | PER | 302 | 0 | 92  | 283.20 |
| ## 160 | cau_286_y  | cau  | PER | 303 | 0 | 113 | 218.20 |
| ## 161 | cau_46_y   | cau  | PER | 310 | 0 | 110 | NA     |
| ## 162 | hybr_107_n | hybr | PER | 312 | 0 | 92  | 246.20 |
| ## 163 | cau_368_y  | cau  | PER | 313 | 0 | 110 | 204.20 |
| ## 164 | cau_347_y  | cau  | PER | 318 | 0 | 117 | 234.20 |
| ## 165 | hybr_115_y | hybr | BOL | 326 | 0 | 110 | 269.20 |
| ## 166 | cau_54_n   | cau  | PER | 327 | 0 | 110 | 295.20 |
| ## 167 | cau_33_y   | cau  | ARG | 402 | 0 | 125 | 285.20 |
| ## 168 | cau_319_y  | cau  | PER | 403 | 0 | 110 | 239.20 |
| ## 169 | cau_18_y   | cau  | PER | 406 | 0 | 125 | 217.20 |
| ## 170 | cru_99_y   | cru  | BRA | 407 | 1 | 97  | 242.20 |
| ## 171 | cau_335_y  | cau  | PER | 409 | 0 | 102 | NA     |
| ## 172 | cau_318_y  | cau  | PER | 410 | 0 | 102 | NA     |
| ## 173 | cau_367_y  | cau  | PER | 411 | 0 | 131 | 229.20 |
| ## 174 | cau_337_y  | cau  | PER | 413 | 0 | 102 | 231.20 |
| ## 175 | cau_332_y  | cau  | BOL | 414 | 0 | 125 | 239.20 |
| ## 176 | cau_324_y  | cau  | PER | 416 | 0 | 102 | 261.20 |
| ## 177 | cau_310_y  | cau  | BOL | 422 | 0 | 110 | 276.20 |
| ## 178 | cau_62_y   | cau  | PER | 427 | 0 | 113 | 190.20 |
| ## 179 | cau_49_y   | cau  | BOL | 505 | 0 | 110 | 219.20 |
| ## 180 | cau_350_y  | cau  | PER | 507 | 0 | 110 | 217.20 |
| ## 181 | cau_308_y  | cau  | BOL | 514 | 0 | 110 | 221.20 |
| ## 182 | cru_85_n   | cru  | ARG | 517 | 1 | 71  | 144.20 |
| ## 183 | cau_307_y  | cau  | BOL | 521 | 0 | 102 | 196.20 |
| ## 184 | cau_362_y  | cau  | PER | 601 | 0 | 110 | 200.20 |
| ## 185 | cau_363_y  | cau  | PER | 603 | 0 | 125 | 201.20 |
| ## 186 | cau_352_y  | cau  | PER | 604 | 0 | 102 | 235.20 |
| ## 187 | quit_192_y | quit | BOL | 611 | 0 | 92  | NA     |
| ## 188 | cau_14_y   | cau  | PER | 617 | 0 | 102 | 275.20 |
| ## 189 | cau_336_y  | cau  | PER | 621 | 0 | 97  | 215.20 |
| ## 190 | cau_317_y  | cau  | PER | 625 | 0 | 89  | 189.20 |
| ## 191 | cau_48_y   | cau  | PER | 702 | 0 | 110 | 206.20 |
| ## 192 | cau_369_y  | cau  | PER | 704 | 0 | 113 | NA     |
| ## 193 | cau_312_y  | cau  | PER | 705 | 0 | 113 | 227.20 |
| ## 194 | hdus_127_y | hdus | PER | 709 | 0 | 151 | 107.20 |
| ## 195 | cau_284_y  | cau  | PER | 710 | 0 | 110 | 194.20 |
| ## 196 | quit_196_y | quit | PER | 716 | 0 | 110 | 207.20 |
| ## 197 | hybr_114_n | hybr | PER | 717 | 1 | 50  | 131.20 |
| ## 198 | cru_67_y   | cru  | PER | 718 | 1 | 110 | 210.20 |
| ## 199 | cau_53_y   | cau  | PER | 719 | 0 | 110 | 226.20 |
| ## 200 | cau_35_n   | cau  | BOL | 720 | 0 | 110 | 226.20 |
| ## 201 | quit_181_n | quit | ARG | 722 | 0 | 76  | 204.20 |
| ## 202 | cau_321_y  | cau  | BOL | 723 | 0 | 117 | 182.20 |
| ## 203 | cau_37_n   | cau  | BOL | 724 | 0 | 117 | 216.20 |
| ## 204 | cau_309_y  | cau  | BOL | 802 | 0 | 102 | 288.20 |
| ## 205 | cau_36_n   | cau  | PER | 805 | 0 | 110 | 254.20 |
| ## 206 | cau_356_y  | cau  | PER | 806 | 0 | 128 | 181.20 |
| ## 207 | cau_305_y  | cau  | BOL | 816 | 0 | 110 | 273.20 |

|        |            |           |           |            |           |          |         |
|--------|------------|-----------|-----------|------------|-----------|----------|---------|
| ## 208 | quit_186_n | quit      | PER       | 817        | 1         | 50       | 144.20  |
| ## 209 | cau_15_y   | cau       | ARG       | 824        | 0         | 125      | 219.20  |
| ## 210 | quit_185_y | quit      | BRA       | 825        | 0         | 128      | 216.20  |
| ## 211 | cau_331_y  | cau       | PER       | 826        | 0         | 113      | 187.20  |
| ## 212 | hybr_120_y | hybr      | PER       | 901        | 0         | 160      | 261.20  |
| ## 213 | cau_313_n  | cau       | PER       | 902        | 0         | 125      | 245.20  |
| ## 214 | cau_311_y  | cau       | PER       | 903        | 0         | 110      | 241.20  |
| ## 215 | quit_195_n | quit      | ARG       | 912        | 0         | 92       | 205.20  |
| ## 216 | hybr_117_y | hybr      | BOL       | 913        | 0         | 89       | 213.20  |
| ## 217 | cau_21_y   | cau       | ARG       | 920        | 0         | 102      | 218.20  |
| ## 218 | quit_183_n | quit      | BOL       | 922        | 0         | 102      | 233.20  |
| ## 219 | hybr_303_y | hybr      | BOL       | 925        | 0         | 110      | 206.20  |
| ## 220 | cau_25_y   | cau       | PER       | 1002       | 0         | 126      | 252.45  |
| ## 221 | cau_358_y  | cau       | BOL       | 1003       | 0         | 114      | 236.45  |
| ## 222 | cau_41_n   | cau       | PER       | 1005       | 0         | 111      | 235.45  |
| ## 223 | cau_12_n   | cau       | BOL       | 1018       | 0         | 118      | 242.45  |
| ## 224 | cau_355_n  | cau       | PER       | 1023       | 0         | 103      | 212.45  |
| ## 225 | cau_322_y  | cau       | PER       | 1025       | 0         | 118      | 223.45  |
| ## 226 | hdus_139_y | hdus      | BOL       | 1026       | 0         | 103      | 198.45  |
| ##     | longitude  | latitude  | elevation | prec       | temp      | sr       | GDD10c  |
| ## 1   | -98.50000  | 18.750000 | 1540      | 70.416667  | 21.775000 | 17724.42 | 594.90  |
| ## 2   | -97.71667  | 20.001389 | 723       | 175.750000 | 20.358333 | 17263.58 | 1107.95 |
| ## 3   | -98.75000  | 18.750000 | 1543      | 76.250000  | 21.808334 | 17850.33 | 872.40  |
| ## 4   | -99.01667  | 19.250000 | 2348      | 55.583333  | 15.916667 | 18202.75 | 594.90  |
| ## 5   | -98.21667  | 19.683333 | 2984      | 77.333333  | 11.275000 | 17715.00 | 1116.80 |
| ## 6   | -98.33333  | 19.250000 | 2348      | 65.750000  | 15.358334 | 17992.25 | 1126.95 |
| ## 7   | -98.76667  | 19.116667 | 2477      | 78.750000  | 15.150000 | 17840.83 | 1113.45 |
| ## 8   | -98.21667  | 19.683333 | 2984      | 77.333333  | 11.275000 | 17715.00 | 1196.15 |
| ## 9   | -97.94471  | 20.012118 | 1987      | 96.833333  | 15.166667 | 17438.25 | 1196.15 |
| ## 10  | -96.77312  | 16.874277 | 1495      | 70.083333  | 21.666667 | 17064.92 | NA      |
| ## 11  | -97.01667  | 18.966667 | 1275      | 131.166667 | 19.691667 | 15909.75 | 1113.45 |
| ## 12  | -98.33414  | 19.239048 | 2255      | 64.416667  | 15.825000 | 17998.58 | 663.60  |
| ## 13  | -98.75000  | 18.716667 | 1468      | 74.416667  | 22.416667 | 17947.42 | 997.45  |
| ## 14  | -97.71667  | 18.966667 | 2125      | 45.833333  | 15.783333 | 17248.92 | 1093.65 |
| ## 15  | -99.01667  | 19.250000 | 2348      | 55.583333  | 15.916667 | 18202.75 | 611.20  |
| ## 16  | -98.33414  | 19.239048 | 2255      | 64.416667  | 15.825000 | 17998.58 | 611.20  |
| ## 17  | -98.76667  | 19.116667 | 2477      | 78.750000  | 15.150000 | 17840.83 | 1156.65 |
| ## 18  | -97.71667  | 18.966667 | 2125      | 45.833333  | 15.783333 | 17248.92 | 1156.65 |
| ## 19  | -90.79379  | 14.796239 | 1801      | 121.750000 | 17.058333 | 19452.83 | 719.35  |
| ## 20  | -98.89401  | 19.498709 | 2248      | 47.500000  | 16.300000 | 18370.25 | 778.45  |
| ## 21  | -90.73043  | 14.571722 | 1616      | 102.916667 | 18.066667 | 19654.75 | 778.45  |
| ## 22  | -97.71667  | 20.001389 | 723       | 175.750000 | 20.358333 | 17263.58 | 884.35  |
| ## 23  | -107.00000 | 26.166667 | 2183      | 82.750000  | 14.550000 | 18071.00 | 984.90  |
| ## 24  | -108.83333 | 27.416667 | 392       | 60.583333  | 24.050000 | 18454.00 | 797.30  |
| ## 25  | -98.33414  | 19.239048 | 2255      | 64.416667  | 15.825000 | 17998.58 | 1113.45 |
| ## 26  | -99.01667  | 19.250000 | 2302      | 52.916667  | 16.100000 | 18189.00 | 1050.70 |
| ## 27  | -98.89821  | 19.559241 | 2254      | 46.083333  | 16.241667 | 18372.83 | 797.30  |
| ## 28  | -66.47890  | 18.244193 | 536       | 171.250000 | 22.275000 | 18434.33 | 719.35  |
| ## 29  | -97.44444  | 19.880556 | 1704      | 105.750000 | 16.166667 | 16742.17 | 611.20  |
| ## 30  | -98.75000  | 18.716667 | 1468      | 74.416667  | 22.416667 | 17947.42 | 611.20  |
| ## 31  | -108.50000 | 27.416667 | 588       | 64.083333  | 22.991667 | 18472.50 | 884.35  |
| ## 32  | -97.01667  | 18.950000 | 1146      | 122.083333 | 20.241667 | 15911.58 | 984.90  |
| ## 33  | -98.16667  | 19.416667 | 2431      | 62.416667  | 14.441667 | 17865.58 | 967.00  |
| ## 34  | -97.63333  | 19.916667 | 1734      | 106.000000 | 16.325000 | 17069.00 | 967.00  |

|       |           |            |      |            |           |          |         |
|-------|-----------|------------|------|------------|-----------|----------|---------|
| ## 35 | -99.01667 | 19.250000  | 2348 | 55.583333  | 15.916667 | 18202.75 | 1126.95 |
| ## 36 | -98.76667 | 18.700000  | 1380 | 72.750000  | 22.983333 | 17906.42 | 611.20  |
| ## 37 | -98.75000 | 18.750000  | 1543 | 76.250000  | 21.808334 | 17850.33 | 611.20  |
| ## 38 | -98.89401 | 19.498709  | 2248 | 47.500000  | 16.300000 | 18370.25 | 837.15  |
| ## 39 | -90.79379 | 14.796239  | 1801 | 121.750000 | 17.058333 | 19452.83 | 663.60  |
| ## 40 | -98.46468 | 18.594558  | 1284 | 62.916667  | 22.983333 | 17754.83 | NA      |
| ## 41 | -97.01667 | 18.966667  | 1275 | 131.166667 | 19.691667 | 15909.75 | 1118.95 |
| ## 42 | -97.62778 | 19.966667  | 1027 | 164.916667 | 19.283334 | 17165.17 | NA      |
| ## 43 | -96.38867 | 18.066202  | 95   | 283.333333 | 25.791667 | 16188.33 | 967.00  |
| ## 44 | -90.82485 | 14.659463  | 1804 | 118.750000 | 17.225000 | 19384.33 | NA      |
| ## 45 | -98.89401 | 19.498709  | 2248 | 47.500000  | 16.300000 | 18370.25 | 1113.45 |
| ## 46 | -98.79761 | 18.724242  | 1437 | 74.666667  | 22.566667 | 17851.00 | 611.20  |
| ## 47 | -98.75000 | 18.716667  | 1468 | 74.416667  | 22.416667 | 17947.42 | 611.20  |
| ## 48 | -98.50000 | 18.750000  | 1540 | 70.416667  | 21.775000 | 17724.42 | 663.60  |
| ## 49 | -98.46468 | 18.594558  | 1284 | 62.916667  | 22.983333 | 17754.83 | 884.35  |
| ## 50 | -98.76667 | 19.116667  | 2477 | 78.750000  | 15.150000 | 17840.83 | 1126.95 |
| ## 51 | -98.75000 | 18.716667  | 1468 | 74.416667  | 22.416667 | 17947.42 | 623.55  |
| ## 52 | -98.33333 | 19.250000  | 2348 | 65.750000  | 15.358334 | 17992.25 | 1053.85 |
| ## 53 | -97.62778 | 19.966667  | 1027 | 164.916667 | 19.283334 | 17165.17 | NA      |
| ## 54 | -97.62778 | 19.966667  | 1027 | 164.916667 | 19.283334 | 17165.17 | 1161.85 |
| ## 55 | -96.86667 | 16.800000  | 1633 | 64.583333  | 20.466666 | 17211.83 | NA      |
| ## 56 | -91.49589 | 15.321985  | 1878 | 111.416667 | 17.708333 | 19019.33 | NA      |
| ## 57 | -90.82485 | 14.659463  | 1804 | 118.750000 | 17.225000 | 19384.33 | 725.80  |
| ## 58 | -98.75000 | 18.716667  | 1468 | 74.416667  | 22.416667 | 17947.42 | 623.55  |
| ## 59 | -98.42435 | 19.270982  | 2251 | 64.500000  | 16.008333 | 17840.75 | 1115.95 |
| ## 60 | -97.62778 | 19.966667  | 1027 | 164.916667 | 19.283334 | 17165.17 | NA      |
| ## 61 | -77.00000 | -9.000000  | 3363 | 67.000000  | 12.916667 | 14869.42 | 1047.15 |
| ## 62 | -77.13901 | -9.486735  | 3273 | 70.416667  | 12.066667 | 14815.58 | 773.80  |
| ## 63 | -77.72563 | -9.416307  | 4518 | 55.583333  | 3.600000  | 15700.67 | 960.30  |
| ## 64 | -78.65881 | -1.628928  | 2865 | 48.666667  | 13.458333 | 15607.00 | 960.30  |
| ## 65 | -78.66724 | -1.414770  | 3415 | 69.000000  | 9.000000  | 12427.17 | 960.30  |
| ## 66 | -77.53007 | -9.514881  | 3052 | 48.666667  | 13.441667 | 15679.75 | 992.90  |
| ## 67 | -75.73134 | -10.759094 | 2622 | 61.916667  | 14.500000 | 14874.92 | 1107.95 |
| ## 68 | -78.88653 | -2.710103  | 2664 | 71.333333  | 13.650000 | 13762.92 | 960.30  |
| ## 69 | -78.39511 | -0.211229  | 2348 | 80.000000  | 15.800000 | 15344.75 | 884.35  |
| ## 70 | -77.74361 | -9.138330  | 2506 | 34.000000  | 16.316667 | 15795.17 | 984.90  |
| ## 71 | -77.74406 | -9.139853  | 2506 | 34.000000  | 16.316667 | 15795.17 | 967.00  |
| ## 72 | -77.17131 | -9.348316  | 3107 | 66.000000  | 13.366667 | 14839.75 | 967.00  |
| ## 73 | -78.17221 | -7.334439  | 2260 | 54.333333  | 16.783333 | 15110.33 | 778.45  |
| ## 74 | -78.75203 | -6.706250  | 2722 | 112.500000 | 13.825000 | 14545.33 | 967.00  |
| ## 75 | -77.98376 | -1.633505  | 857  | 344.000000 | 21.508333 | 13174.42 | 967.00  |
| ## 76 | -78.87554 | -2.545267  | 3100 | 62.583333  | 11.233333 | 14333.83 | 967.00  |
| ## 77 | -75.73134 | -10.759094 | 2622 | 61.916667  | 14.500000 | 14874.92 | 884.35  |
| ## 78 | -77.15529 | -9.325917  | 3301 | 66.083333  | 12.025000 | 14644.08 | 884.35  |
| ## 79 | -77.53007 | -9.514881  | 3052 | 48.666667  | 13.441667 | 15679.75 | 967.00  |
| ## 80 | -77.00000 | -9.000000  | 3363 | 67.000000  | 12.916667 | 14869.42 | 884.35  |
| ## 81 | -78.62929 | -1.607675  | 2697 | 45.000000  | 14.241667 | 15429.67 | 967.00  |
| ## 82 | -78.77416 | -2.886787  | 2268 | 74.750000  | 15.783333 | 13983.83 | 967.00  |
| ## 83 | -78.54736 | -0.369085  | 3092 | 108.500000 | 11.691667 | 14912.00 | 984.90  |
| ## 84 | -78.03183 | -5.973988  | 2700 | 89.250000  | 14.575000 | 14288.00 | 984.90  |
| ## 85 | -79.14679 | -3.143396  | 2249 | 53.333333  | 15.283333 | 14446.92 | 884.35  |
| ## 86 | -77.00000 | -9.000000  | 3363 | 67.000000  | 12.916667 | 14869.42 | 967.00  |
| ## 87 | -78.54652 | -0.395852  | 2919 | 98.250000  | 12.750000 | 14943.50 | 719.35  |
| ## 88 | -78.65881 | -1.628928  | 2865 | 48.666667  | 13.458333 | 15607.00 | 967.00  |



|        |           |            |      |            |           |          |         |
|--------|-----------|------------|------|------------|-----------|----------|---------|
| ## 89  | -78.92419 | -2.514139  | 3028 | 56.916667  | 11.566667 | 14454.67 | 967.00  |
| ## 90  | -78.60702 | -1.375740  | 2921 | 54.583333  | 12.583333 | 13208.92 | 984.90  |
| ## 91  | -78.92419 | -2.514139  | 3028 | 56.916667  | 11.566667 | 14454.67 | 967.00  |
| ## 92  | -77.53588 | -9.432803  | 3272 | 49.000000  | 11.991667 | 15609.92 | 778.45  |
| ## 93  | -78.17221 | -7.334439  | 2260 | 54.333333  | 16.783333 | 15110.33 | 984.90  |
| ## 94  | -75.73134 | -10.759094 | 2622 | 61.916667  | 14.500000 | 14874.92 | 1050.70 |
| ## 95  | -78.12844 | 0.287972   | 2663 | 70.000000  | 13.991667 | 14429.75 | 967.00  |
| ## 96  | -78.50768 | -7.162494  | 2694 | 69.333333  | 14.783333 | 14752.58 | 984.90  |
| ## 97  | -69.18047 | 9.550365   | 177  | 99.416667  | 26.916667 | 16881.00 | 967.00  |
| ## 98  | -77.00000 | -9.000000  | 3363 | 67.000000  | 12.916667 | 14869.42 | 984.90  |
| ## 99  | -77.72563 | -9.416307  | 4518 | 55.583333  | 3.600000  | 15700.67 | 884.35  |
| ## 100 | -77.00000 | -9.000000  | 3363 | 67.000000  | 12.916667 | 14869.42 | 967.00  |
| ## 101 | -78.17221 | -7.334439  | 2260 | 54.333333  | 16.783333 | 15110.33 | 778.45  |
| ## 102 | -77.00000 | -9.000000  | 3363 | 67.000000  | 12.916667 | 14869.42 | 884.35  |
| ## 103 | -78.59322 | -1.134405  | 2672 | 46.250000  | 13.708333 | 14525.75 | 967.00  |
| ## 104 | -77.13901 | -9.486735  | 3273 | 70.416667  | 12.066667 | 14815.58 | 884.35  |
| ## 105 | -78.65881 | -1.628928  | 2865 | 48.666667  | 13.458333 | 15607.00 | 984.90  |
| ## 106 | -77.00000 | -9.000000  | 3363 | 67.000000  | 12.916667 | 14869.42 | 884.35  |
| ## 107 | -77.64205 | -9.832345  | 3385 | 45.416667  | 10.141667 | 15969.25 | 884.35  |
| ## 108 | -77.00000 | -9.000000  | 3363 | 67.000000  | 12.916667 | 14869.42 | 778.45  |
| ## 109 | -78.72185 | -1.945311  | 3182 | 50.166667  | 11.250000 | 15203.67 | 967.00  |
| ## 110 | -77.64655 | -9.281319  | 2667 | 43.416667  | 15.966667 | 16824.08 | 967.00  |
| ## 111 | -77.00000 | -9.000000  | 3363 | 67.000000  | 12.916667 | 14869.42 | 967.00  |
| ## 112 | -78.35147 | -0.063325  | 2125 | 60.000000  | 16.875000 | 15455.83 | 967.00  |
| ## 113 | -78.03183 | -5.973988  | 2700 | 89.250000  | 14.575000 | 14288.00 | 997.45  |
| ## 114 | -77.00000 | -9.000000  | 3363 | 67.000000  | 12.916667 | 14869.42 | 967.00  |
| ## 115 | -77.00000 | -9.000000  | 3363 | 67.000000  | 12.916667 | 14869.42 | 884.35  |
| ## 116 | -77.00000 | -9.000000  | 3363 | 67.000000  | 12.916667 | 14869.42 | 1078.50 |
| ## 117 | -78.50163 | -7.157655  | 2692 | 68.500000  | 14.775000 | 14786.33 | 967.00  |
| ## 118 | -78.61550 | -1.353993  | 2876 | 53.833333  | 12.916667 | 13562.25 | 967.00  |
| ## 119 | -78.54952 | -1.177857  | 2776 | 53.416667  | 13.333333 | 13377.83 | 967.00  |
| ## 120 | -79.00689 | -2.899469  | 2546 | 68.000000  | 14.516667 | 13219.25 | 967.00  |
| ## 121 | -78.03183 | -5.973988  | 2700 | 89.250000  | 14.575000 | 14288.00 | 778.45  |
| ## 122 | -77.00000 | -9.000000  | 3363 | 67.000000  | 12.916667 | 14869.42 | 884.35  |
| ## 123 | -78.20595 | 0.313251   | 2560 | 68.666667  | 14.608333 | 14902.33 | 967.00  |
| ## 124 | -77.00000 | -9.000000  | 3363 | 67.000000  | 12.916667 | 14869.42 | 997.45  |
| ## 125 | -77.53588 | -9.432803  | 3272 | 49.000000  | 11.991667 | 15609.92 | 884.35  |
| ## 126 | -77.17131 | -9.348316  | 3107 | 66.000000  | 13.366667 | 14839.75 | 967.00  |
| ## 127 | -77.74361 | -9.138330  | 2506 | 34.000000  | 16.316667 | 15795.17 | 967.00  |
| ## 128 | -78.20761 | 0.041156   | 2823 | 66.750000  | 13.433333 | 14946.33 | 967.00  |
| ## 129 | -78.88653 | -2.710103  | 2664 | 71.333333  | 13.650000 | 13762.92 | 967.00  |
| ## 130 | -79.00689 | -2.899469  | 2546 | 68.000000  | 14.516667 | 13219.25 | 967.00  |
| ## 131 | -78.17221 | -7.334439  | 2260 | 54.333333  | 16.783333 | 15110.33 | 1093.65 |
| ## 132 | -77.72563 | -9.416307  | 4518 | 55.583333  | 3.600000  | 15700.67 | 997.45  |
| ## 133 | -77.53007 | -9.514881  | 3052 | 48.666667  | 13.441667 | 15679.75 | 1050.70 |
| ## 134 | -79.82561 | -1.043134  | 58   | 131.916667 | 25.133334 | 11787.83 | 967.00  |
| ## 135 | -79.00128 | -1.588997  | 2765 | 59.583333  | 13.050000 | 15128.42 | NA      |
| ## 136 | -78.50768 | -7.162494  | 2694 | 69.333333  | 14.783333 | 14752.58 | 967.00  |
| ## 137 | -77.17131 | -9.348316  | 3107 | 66.000000  | 13.366667 | 14839.75 | 884.35  |
| ## 138 | -77.72563 | -9.416307  | 4518 | 55.583333  | 3.600000  | 15700.67 | 896.70  |
| ## 139 | -78.60702 | -1.375740  | 2921 | 54.583333  | 12.583333 | 13208.92 | 975.25  |
| ## 140 | -78.84740 | -2.198292  | 2386 | 49.666667  | 14.875000 | 15188.17 | 896.70  |
| ## 141 | -79.82561 | -1.043134  | 58   | 131.916667 | 25.133334 | 11787.83 | 896.70  |
| ## 142 | -77.53007 | -9.514881  | 3052 | 48.666667  | 13.441667 | 15679.75 | 975.25  |

|        |           |            |      |            |           |          |         |
|--------|-----------|------------|------|------------|-----------|----------|---------|
| ## 143 | -78.62263 | -1.253131  | 2660 | 46.166667  | 13.925000 | 15065.50 | 1053.85 |
| ## 144 | -78.66869 | -1.347782  | 3244 | 61.750000  | 10.475000 | 12829.25 | 975.25  |
| ## 145 | -73.58656 | -13.697981 | 3219 | 79.416667  | 12.558333 | 16153.75 | 872.40  |
| ## 146 | -74.22260 | -13.164547 | 2729 | 45.333333  | 16.658333 | 16572.17 | 960.30  |
| ## 147 | -74.25025 | -12.931580 | 2640 | 40.833333  | 16.691667 | 16699.08 | 980.30  |
| ## 148 | -71.89052 | -13.535464 | 3309 | 51.666667  | 11.850000 | 16561.75 | 960.30  |
| ## 149 | -72.54998 | -13.516412 | 2754 | 98.500000  | 16.091667 | 16451.00 | 960.30  |
| ## 150 | -47.65000 | -15.633333 | 958  | 121.500000 | 21.341667 | 16605.83 | 516.35  |
| ## 151 | -74.58266 | -12.860836 | 3452 | 67.750000  | 11.508333 | 16548.92 | 992.90  |
| ## 152 | -64.75883 | -21.409904 | 2031 | 52.500000  | 18.375000 | 17303.33 | 960.30  |
| ## 153 | -73.56196 | -13.478882 | 3038 | 81.833333  | 13.833333 | 15172.67 | 960.30  |
| ## 154 | -66.16782 | -17.413549 | 2564 | 57.000000  | 17.233333 | 16719.67 | 997.45  |
| ## 155 | -75.19646 | -12.061098 | 3307 | 61.333333  | 11.533333 | 16674.42 | 984.90  |
| ## 156 | -64.75883 | -21.409904 | 2031 | 52.500000  | 18.375000 | 17303.33 | NA      |
| ## 157 | -71.91762 | -13.668616 | 3406 | 61.000000  | 11.016667 | 15969.25 | 967.00  |
| ## 158 | -64.11433 | -19.097700 | 1635 | 52.666667  | 20.116667 | 15648.33 | 896.70  |
| ## 159 | -71.67067 | -13.356775 | 3521 | 47.333333  | 10.500000 | 16281.33 | 797.30  |
| ## 160 | -72.36342 | -13.756276 | 3507 | 76.500000  | 10.575000 | 15698.75 | 984.90  |
| ## 161 | -70.16667 | -15.216667 | 3895 | 58.666667  | 8.791667  | 17090.42 | 967.00  |
| ## 162 | -73.37850 | -13.658872 | 2972 | 86.916667  | 14.400000 | 15873.75 | 797.30  |
| ## 163 | -71.84630 | -13.761848 | 3096 | 54.083333  | 12.625000 | 16649.25 | 967.00  |
| ## 164 | -72.69996 | -13.525102 | 2782 | 98.333333  | 16.133333 | 16877.25 | 997.45  |
| ## 165 | -65.59431 | -22.066221 | 3447 | 27.833333  | 11.975000 | 19178.08 | 967.00  |
| ## 166 | -74.22260 | -13.164547 | 2729 | 45.333333  | 16.658333 | 16572.17 | 967.00  |
| ## 167 | -68.69652 | -32.900585 | 661  | 17.833333  | 16.633333 | 18259.42 | 1050.70 |
| ## 168 | -72.54704 | -13.510070 | 2754 | 98.500000  | 16.091667 | 16451.00 | 967.00  |
| ## 169 | -74.22260 | -13.164547 | 2729 | 45.333333  | 16.658333 | 16572.17 | 1050.70 |
| ## 170 | -42.87518 | -20.722481 | 652  | 106.166667 | 19.850000 | 14410.17 | 837.15  |
| ## 171 | -72.96320 | -13.366720 | 2466 | 123.833333 | 17.925000 | 16132.50 | 884.35  |
| ## 172 | -73.37850 | -13.658872 | 2972 | 86.916667  | 14.400000 | 15873.75 | 884.35  |
| ## 173 | -72.82476 | -15.643097 | 4185 | 34.166667  | 5.008333  | 18601.75 | 1078.50 |
| ## 174 | -72.96320 | -13.366720 | 2466 | 123.833333 | 17.925000 | 16132.50 | 884.35  |
| ## 175 | -66.26056 | -17.688695 | 2431 | 47.083333  | 17.775000 | 17466.08 | 1050.70 |
| ## 176 | -71.62327 | -13.682642 | 3272 | 46.333333  | 11.491667 | 16326.58 | 884.35  |
| ## 177 | -66.27980 | -17.354352 | 2615 | 62.416667  | 16.675000 | 16561.25 | 967.00  |
| ## 178 | -75.01390 | -12.508010 | 3410 | 62.250000  | 11.158333 | 16350.08 | 984.90  |
| ## 179 | -64.75841 | -21.409969 | 2031 | 52.500000  | 18.375000 | 17303.33 | 967.00  |
| ## 180 | -73.37850 | -13.658872 | 2972 | 86.916667  | 14.400000 | 15873.75 | 967.00  |
| ## 181 | -68.91265 | -17.471669 | 3885 | 34.083333  | 8.708333  | 18219.42 | 967.00  |
| ## 182 | -65.30244 | -36.999577 | 413  | 43.583333  | 14.933333 | 16574.33 | 611.20  |
| ## 183 | -64.75841 | -21.409969 | 2031 | 52.500000  | 18.375000 | 17303.33 | 884.35  |
| ## 184 | -75.19646 | -12.061098 | 3307 | 61.333333  | 11.533333 | 16674.42 | 967.00  |
| ## 185 | -75.01390 | -12.508010 | 3410 | 62.250000  | 11.158333 | 16350.08 | 1050.70 |
| ## 186 | -71.67599 | -13.918236 | 3281 | 59.416667  | 10.925000 | 16488.25 | 884.35  |
| ## 187 | -64.91465 | -19.170805 | 3284 | 52.250000  | 13.191667 | 16505.33 | 797.30  |
| ## 188 | -72.08357 | -13.321357 | 2908 | 40.916667  | 14.641667 | 16473.83 | 884.35  |
| ## 189 | -72.96320 | -13.366720 | 2466 | 123.833333 | 17.925000 | 16132.50 | 837.15  |
| ## 190 | -73.37850 | -13.658872 | 2972 | 86.916667  | 14.400000 | 15873.75 | 778.45  |
| ## 191 | -71.62327 | -13.682642 | 3272 | 46.333333  | 11.491667 | 16326.58 | 967.00  |
| ## 192 | -72.88791 | -13.633957 | 2346 | 109.083333 | 19.241667 | 15822.00 | 984.90  |
| ## 193 | -72.57468 | -13.643851 | 3066 | 84.166667  | 13.633333 | 16639.92 | 984.90  |
| ## 194 | -73.37850 | -13.658872 | 2972 | 86.916667  | 14.400000 | 15873.75 | 1156.65 |
| ## 195 | -73.37850 | -13.658872 | 2972 | 86.916667  | 14.400000 | 15873.75 | 967.00  |
| ## 196 | -72.23330 | -13.283330 | 3225 | 54.833333  | 12.975000 | 16327.75 | 967.00  |

|        |           |            |      |            |           |          |         |
|--------|-----------|------------|------|------------|-----------|----------|---------|
| ## 197 | -70.26695 | -18.017324 | 515  | 0.500000   | 18.166667 | 17525.42 | 416.05  |
| ## 198 | -77.03616 | -12.084401 | 112  | 2.583333   | 19.166667 | 13692.25 | 967.00  |
| ## 199 | -71.84630 | -13.761848 | 3096 | 54.083333  | 12.625000 | 16649.25 | 967.00  |
| ## 200 | -64.72605 | -21.517769 | 1887 | 55.416667  | 18.891667 | 17130.75 | 967.00  |
| ## 201 | -63.59285 | -35.233903 | 127  | 72.750000  | 16.383333 | 16452.75 | 663.60  |
| ## 202 | -64.72605 | -21.517769 | 1887 | 55.416667  | 18.891667 | 17130.75 | 997.45  |
| ## 203 | -64.72605 | -21.517769 | 1887 | 55.416667  | 18.891667 | 17130.75 | 997.45  |
| ## 204 | -65.73575 | -17.402299 | 3427 | 56.916667  | 12.291667 | 16527.00 | 884.35  |
| ## 205 | -71.67599 | -13.918236 | 3281 | 59.416667  | 10.925000 | 16488.25 | 967.00  |
| ## 206 | -71.16999 | -14.355805 | 3694 | 62.166667  | 7.950000  | 16892.42 | 1064.15 |
| ## 207 | -64.91465 | -19.170805 | 3284 | 52.250000  | 13.191667 | 16505.33 | 967.00  |
| ## 208 | -70.26695 | -18.017324 | 515  | 0.500000   | 18.166667 | 17525.42 | 416.05  |
| ## 209 | -71.26836 | -41.034544 | 907  | 68.333333  | 8.183333  | 15208.50 | 1050.70 |
| ## 210 | -47.65000 | -15.633333 | 958  | 121.500000 | 21.341667 | 16605.83 | 1064.15 |
| ## 211 | -71.84630 | -13.761848 | 3096 | 54.083333  | 12.625000 | 16649.25 | 984.90  |
| ## 212 | -75.19646 | -12.061098 | 3307 | 61.333333  | 11.533333 | 16674.42 | 1196.15 |
| ## 213 | -73.37850 | -13.658872 | 2972 | 86.916667  | 14.400000 | 15873.75 | 1050.70 |
| ## 214 | -73.01293 | -14.223123 | 3532 | 75.750000  | 10.100000 | 16835.92 | 967.00  |
| ## 215 | -61.09163 | -31.727270 | 43   | 83.000000  | 18.216667 | 17026.92 | 797.30  |
| ## 216 | -64.11433 | -19.097700 | 1635 | 52.666667  | 20.116667 | 15648.33 | 778.45  |
| ## 217 | -65.30244 | -36.999577 | 413  | 43.583333  | 14.933333 | 16574.33 | 884.35  |
| ## 218 | -64.72605 | -21.517769 | 1887 | 55.416667  | 18.891667 | 17130.75 | 884.35  |
| ## 219 | -64.91465 | -19.170805 | 3284 | 52.250000  | 13.191667 | 16505.33 | 967.00  |
| ## 220 | -73.61395 | -13.533680 | 3491 | 79.083333  | 10.725000 | 15398.92 | 1053.85 |
| ## 221 | -64.82037 | -21.622475 | 1980 | 55.833333  | 18.158333 | 15831.83 | 988.35  |
| ## 222 | -74.22260 | -13.164547 | 2729 | 45.333333  | 16.658333 | 16572.17 | 975.25  |
| ## 223 | -64.72605 | -21.517769 | 1887 | 55.416667  | 18.891667 | 17130.75 | 1002.95 |
| ## 224 | -74.22260 | -13.164547 | 2729 | 45.333333  | 16.658333 | 16572.17 | 896.70  |
| ## 225 | -73.37850 | -13.658872 | 2972 | 86.916667  | 14.400000 | 15873.75 | 1002.95 |
| ## 226 | -64.72605 | -21.517769 | 1887 | 55.416667  | 18.891667 | 17130.75 | 896.70  |
| ##     | latgroup  |            |      |            |           |          |         |
| ## 1   | ca        |            |      |            |           |          |         |
| ## 2   | ca        |            |      |            |           |          |         |
| ## 3   | ca        |            |      |            |           |          |         |
| ## 4   | ca        |            |      |            |           |          |         |
| ## 5   | ca        |            |      |            |           |          |         |
| ## 6   | ca        |            |      |            |           |          |         |
| ## 7   | ca        |            |      |            |           |          |         |
| ## 8   | ca        |            |      |            |           |          |         |
| ## 9   | ca        |            |      |            |           |          |         |
| ## 10  | ca        |            |      |            |           |          |         |
| ## 11  | ca        |            |      |            |           |          |         |
| ## 12  | ca        |            |      |            |           |          |         |
| ## 13  | ca        |            |      |            |           |          |         |
| ## 14  | ca        |            |      |            |           |          |         |
| ## 15  | ca        |            |      |            |           |          |         |
| ## 16  | ca        |            |      |            |           |          |         |
| ## 17  | ca        |            |      |            |           |          |         |
| ## 18  | ca        |            |      |            |           |          |         |
| ## 19  | ca        |            |      |            |           |          |         |
| ## 20  | ca        |            |      |            |           |          |         |
| ## 21  | ca        |            |      |            |           |          |         |
| ## 22  | ca        |            |      |            |           |          |         |
| ## 23  | ca        |            |      |            |           |          |         |

|       |     |
|-------|-----|
| ## 24 | ca  |
| ## 25 | ca  |
| ## 26 | ca  |
| ## 27 | ca  |
| ## 28 | ca  |
| ## 29 | ca  |
| ## 30 | ca  |
| ## 31 | ca  |
| ## 32 | ca  |
| ## 33 | ca  |
| ## 34 | ca  |
| ## 35 | ca  |
| ## 36 | ca  |
| ## 37 | ca  |
| ## 38 | ca  |
| ## 39 | ca  |
| ## 40 | ca  |
| ## 41 | ca  |
| ## 42 | ca  |
| ## 43 | ca  |
| ## 44 | ca  |
| ## 45 | ca  |
| ## 46 | ca  |
| ## 47 | ca  |
| ## 48 | ca  |
| ## 49 | ca  |
| ## 50 | ca  |
| ## 51 | ca  |
| ## 52 | ca  |
| ## 53 | ca  |
| ## 54 | ca  |
| ## 55 | ca  |
| ## 56 | ca  |
| ## 57 | ca  |
| ## 58 | ca  |
| ## 59 | ca  |
| ## 60 | ca  |
| ## 61 | sa1 |
| ## 62 | sa1 |
| ## 63 | sa1 |
| ## 64 | sa1 |
| ## 65 | sa1 |
| ## 66 | sa1 |
| ## 67 | sa1 |
| ## 68 | sa1 |
| ## 69 | sa1 |
| ## 70 | sa1 |
| ## 71 | sa1 |
| ## 72 | sa1 |
| ## 73 | sa1 |
| ## 74 | sa1 |
| ## 75 | sa1 |
| ## 76 | sa1 |
| ## 77 | sa1 |

|        |     |
|--------|-----|
| ## 78  | sa1 |
| ## 79  | sa1 |
| ## 80  | sa1 |
| ## 81  | sa1 |
| ## 82  | sa1 |
| ## 83  | sa1 |
| ## 84  | sa1 |
| ## 85  | sa1 |
| ## 86  | sa1 |
| ## 87  | sa1 |
| ## 88  | sa1 |
| ## 89  | sa1 |
| ## 90  | sa1 |
| ## 91  | sa1 |
| ## 92  | sa1 |
| ## 93  | sa1 |
| ## 94  | sa1 |
| ## 95  | sa1 |
| ## 96  | sa1 |
| ## 97  | sa1 |
| ## 98  | sa1 |
| ## 99  | sa1 |
| ## 100 | sa1 |
| ## 101 | sa1 |
| ## 102 | sa1 |
| ## 103 | sa1 |
| ## 104 | sa1 |
| ## 105 | sa1 |
| ## 106 | sa1 |
| ## 107 | sa1 |
| ## 108 | sa1 |
| ## 109 | sa1 |
| ## 110 | sa1 |
| ## 111 | sa1 |
| ## 112 | sa1 |
| ## 113 | sa1 |
| ## 114 | sa1 |
| ## 115 | sa1 |
| ## 116 | sa1 |
| ## 117 | sa1 |
| ## 118 | sa1 |
| ## 119 | sa1 |
| ## 120 | sa1 |
| ## 121 | sa1 |
| ## 122 | sa1 |
| ## 123 | sa1 |
| ## 124 | sa1 |
| ## 125 | sa1 |
| ## 126 | sa1 |
| ## 127 | sa1 |
| ## 128 | sa1 |
| ## 129 | sa1 |
| ## 130 | sa1 |
| ## 131 | sa1 |

|        |     |
|--------|-----|
| ## 132 | sa1 |
| ## 133 | sa1 |
| ## 134 | sa1 |
| ## 135 | sa1 |
| ## 136 | sa1 |
| ## 137 | sa1 |
| ## 138 | sa1 |
| ## 139 | sa1 |
| ## 140 | sa1 |
| ## 141 | sa1 |
| ## 142 | sa1 |
| ## 143 | sa1 |
| ## 144 | sa1 |
| ## 145 | sa2 |
| ## 146 | sa2 |
| ## 147 | sa2 |
| ## 148 | sa2 |
| ## 149 | sa2 |
| ## 150 | sa2 |
| ## 151 | sa2 |
| ## 152 | sa2 |
| ## 153 | sa2 |
| ## 154 | sa2 |
| ## 155 | sa2 |
| ## 156 | sa2 |
| ## 157 | sa2 |
| ## 158 | sa2 |
| ## 159 | sa2 |
| ## 160 | sa2 |
| ## 161 | sa2 |
| ## 162 | sa2 |
| ## 163 | sa2 |
| ## 164 | sa2 |
| ## 165 | sa2 |
| ## 166 | sa2 |
| ## 167 | sa2 |
| ## 168 | sa2 |
| ## 169 | sa2 |
| ## 170 | sa2 |
| ## 171 | sa2 |
| ## 172 | sa2 |
| ## 173 | sa2 |
| ## 174 | sa2 |
| ## 175 | sa2 |
| ## 176 | sa2 |
| ## 177 | sa2 |
| ## 178 | sa2 |
| ## 179 | sa2 |
| ## 180 | sa2 |
| ## 181 | sa2 |
| ## 182 | sa2 |
| ## 183 | sa2 |
| ## 184 | sa2 |
| ## 185 | sa2 |

```
## 186      sa2
## 187      sa2
## 188      sa2
## 189      sa2
## 190      sa2
## 191      sa2
## 192      sa2
## 193      sa2
## 194      sa2
## 195      sa2
## 196      sa2
## 197      sa2
## 198      sa2
## 199      sa2
## 200      sa2
## 201      sa2
## 202      sa2
## 203      sa2
## 204      sa2
## 205      sa2
## 206      sa2
## 207      sa2
## 208      sa2
## 209      sa2
## 210      sa2
## 211      sa2
## 212      sa2
## 213      sa2
## 214      sa2
## 215      sa2
## 216      sa2
## 217      sa2
## 218      sa2
## 219      sa2
## 220      sa2
## 221      sa2
## 222      sa2
## 223      sa2
## 224      sa2
## 225      sa2
## 226      sa2
```

Latitudinal grouping on the map

```
map3 <- ggplot() + mapa + theme_bw() +
  theme(panel.border = element_blank(), panel.grid.major = element_line(colour = "grey80"), panel
  geom_point(data = data_gbl, # Add and plot species data
    aes(x = longitude, y = latitude,
        colour = latgroup)) +
  coord_quickmap() + # Prevents stretching when resizing
  theme_bw() + # Remove ugly grey background
  xlab("Longitude") +
  ylab("Latitude") +
  theme(legend.position="none")
  #guides(colour=guide_legend(title="Accessions grouped by latitude"))
```

```
#map3
```

Three maps together. First is showing the accessions by species, second shows all accessions with the same color. Third shows our latitudinal grouping.

```
maps <- grid.arrange(map1, map2, map3, ncol = 3)
```

```
## Warning: Removed 28 rows containing missing values (geom_point).
```

```
## Warning: Removed 28 rows containing missing values (geom_point).
```

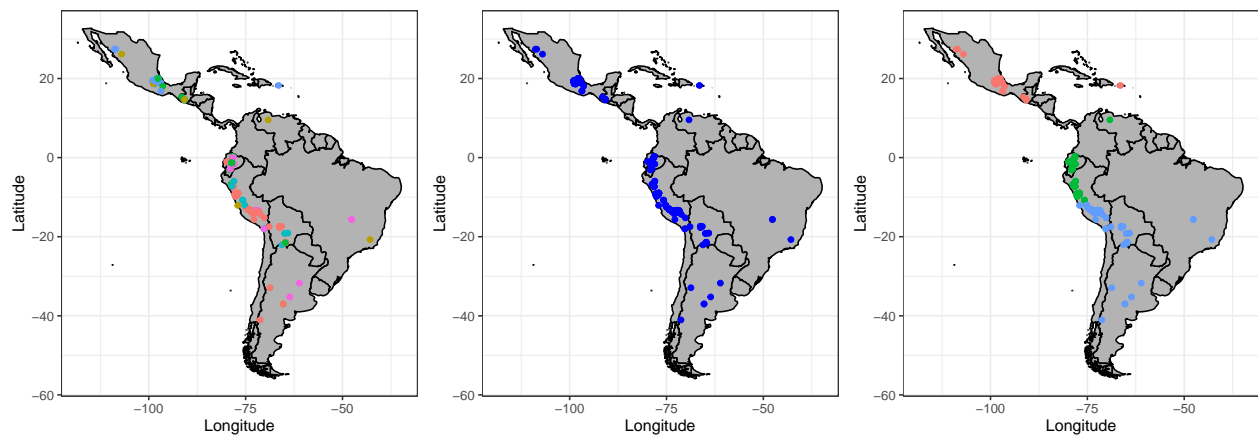

```
maps
```

```
## TableGrob (1 x 3) "arrange": 3 grobs
##   z      cells  name      grob
## 1 1 (1-1,1-1) arrange gtable[layout]
## 2 2 (1-1,2-2) arrange gtable[layout]
## 3 3 (1-1,3-3) arrange gtable[layout]
```

## 2. Comparison of latitudinal groups

### Phenotypic traits

#### A. Flowering time

```
ggdensity(data_gbl$ft_adjusted,
           main = "Density plot of flowering time",
           xlab = "Flowering time")
```

```
## Warning: Removed 10 rows containing non-finite values (stat_density).
```



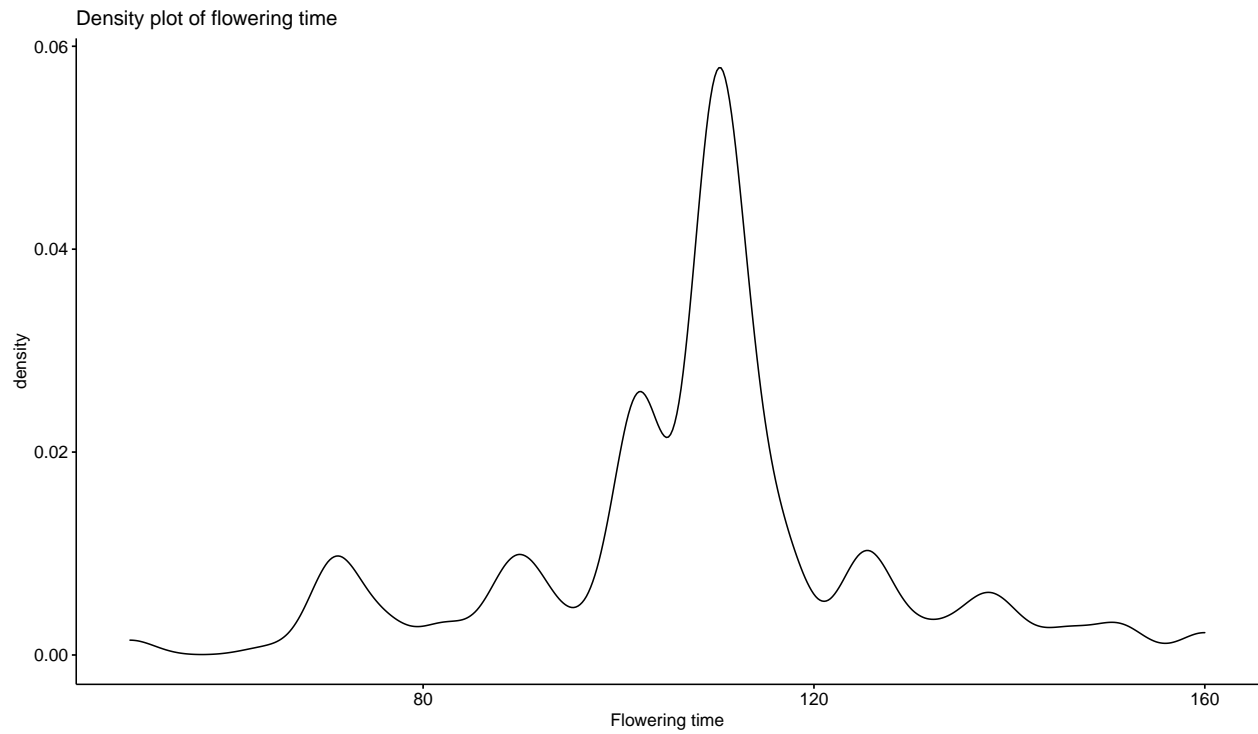

```
ggplot(data = data_gbl, mapping = aes(x = latgroup, y = ft_adjusted)) +  
  geom_boxplot(outlier.size = -1)+geom_jitter(position=position_jitter(0.2), size=0.4)
```

## Warning: Removed 10 rows containing non-finite values (stat\_boxplot).

## Warning: Removed 10 rows containing missing values (geom\_point).

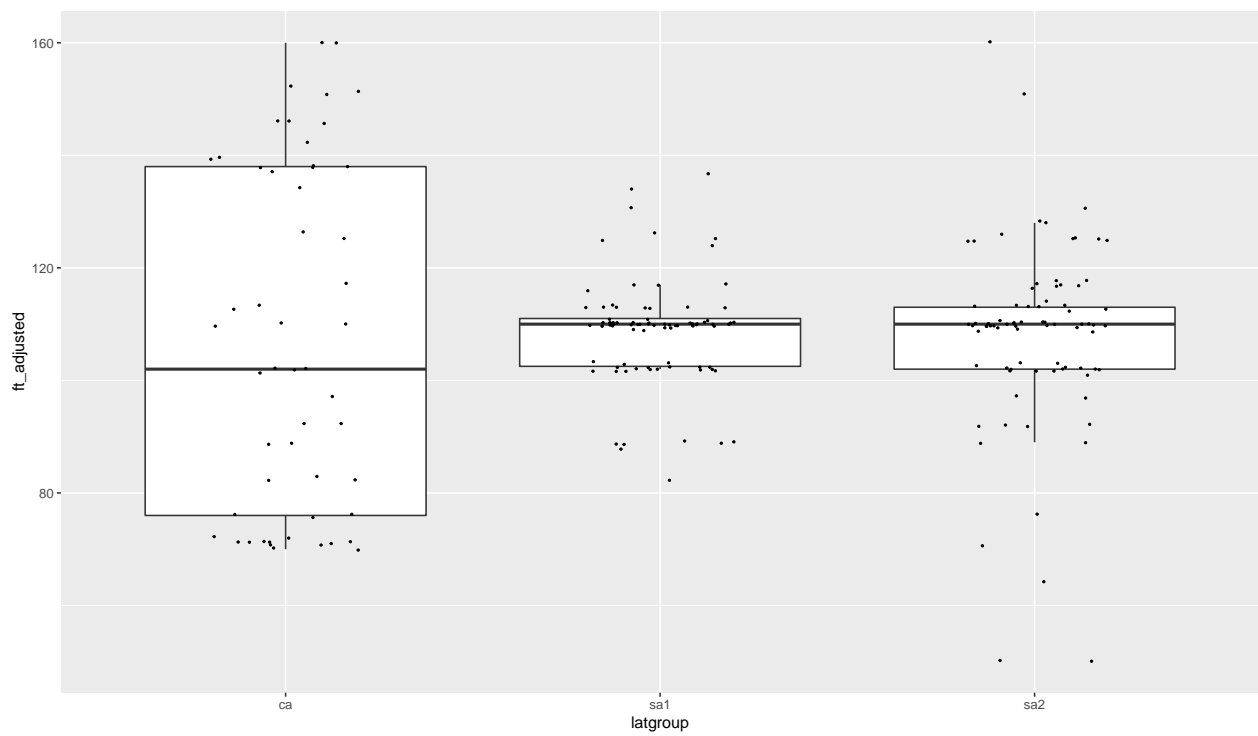

```
md_11 <-glm(ft_adjusted ~ latgroup , data = data_gbl, family = gaussian)
summary(md_11)

##
## Call:
## glm(formula = ft_adjusted ~ latgroup, family = gaussian, data = data_gbl)
##
## Deviance Residuals:
##      Min       1Q   Median       3Q      Max
## -57.963  -6.723   1.277   5.037  52.827
##
## Coefficients:
##              Estimate Std. Error t value Pr(>|t|)
## (Intercept) 107.1731     2.6365  40.649  <2e-16 ***
## latgroupsa1   1.5498     3.3625   0.461   0.645
## latgroupsa2   0.7899     3.3784   0.234   0.815
## ---
## Signif. codes:  0 '***' 0.001 '**' 0.01 '*' 0.05 '.' 0.1 ' ' 1
##
## (Dispersion parameter for gaussian family taken to be 361.4693)
##
##      Null deviance: 77071  on 215  degrees of freedom
## Residual deviance: 76993  on 213  degrees of freedom
## (10 observations deleted due to missingness)
## AIC: 1890.2
##
## Number of Fisher Scoring iterations: 2
lrtest(md_11)

## Likelihood ratio test
##
## Model 1: ft_adjusted ~ latgroup
## Model 2: ft_adjusted ~ 1
##   #Df  LogLik Df  Chisq Pr(>Chisq)
## 1    4 -941.12
## 2    2 -941.23 -2  0.2191    0.8962
#lsmeans_latgroup_ft <- LSD.test(md_11, "latgroup", p.adj="none" )
#lsmeans_latgroup_ft
```

No significant difference

## B. Plant height

```
ggdensity(data_gbl$ph_adjusted,
           main = "Density plot of plant height",
           xlab = "Plant height")

## Warning: Removed 16 rows containing non-finite values (stat_density).
```

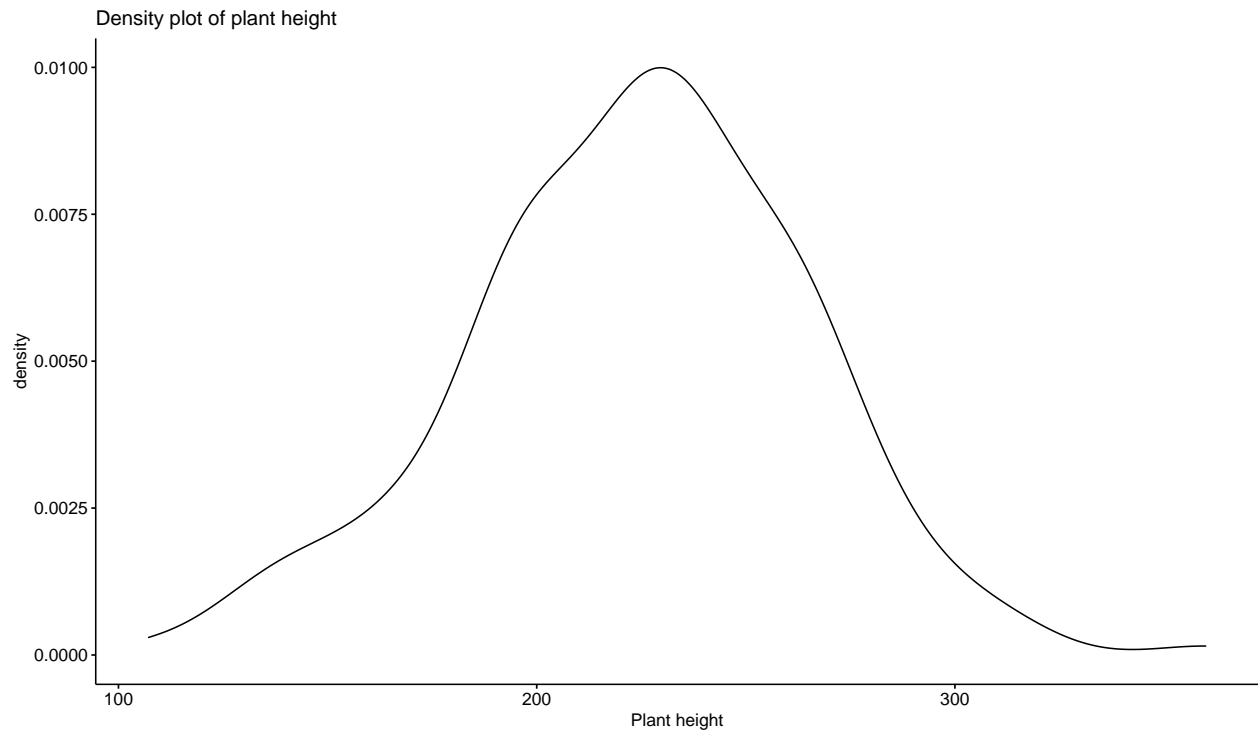

```
ggplot(data = data_gbl, mapping = aes(x = latgroup, y = ph_adjusted)) +  
  geom_boxplot(outlier.size = -1)+geom_jitter(position=position_jitter(0.2), size=0.4)
```

## Warning: Removed 16 rows containing non-finite values (stat\_boxplot).

## Warning: Removed 16 rows containing missing values (geom\_point).

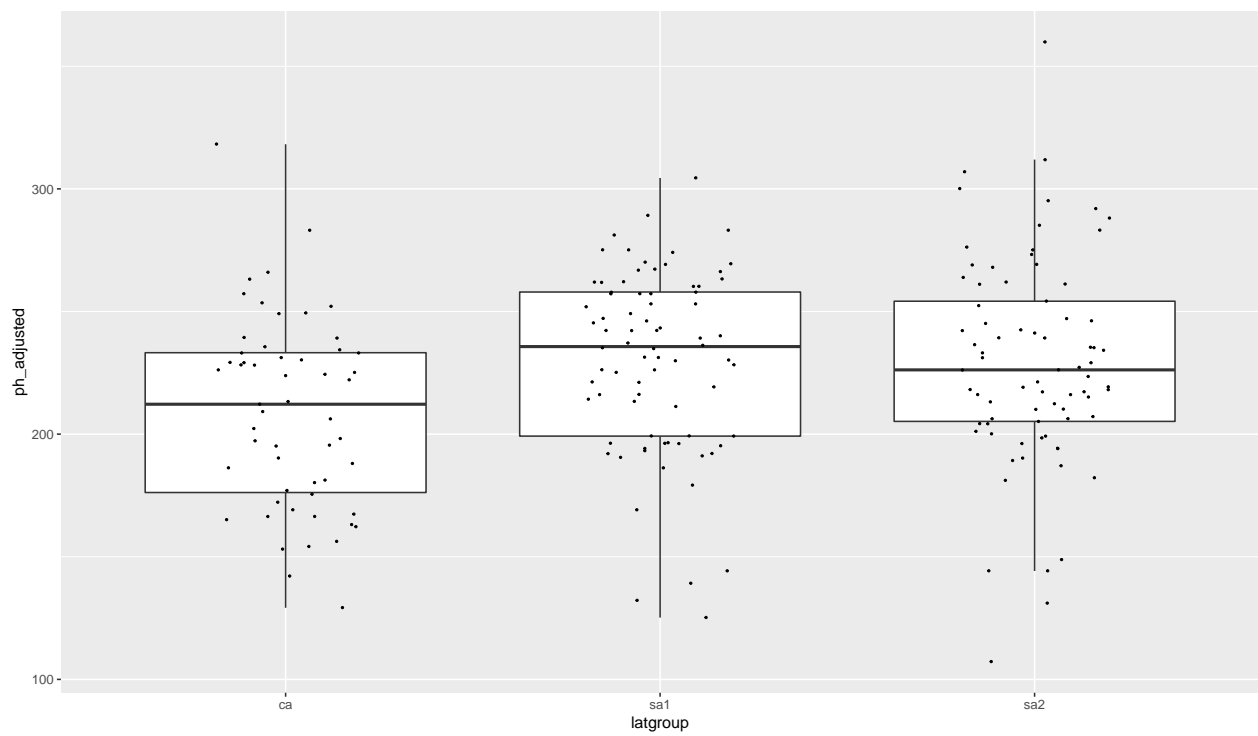

```
md_12 <-glm(ph_adjusted ~ latgroup , data = data_gbl, family="gaussian")
summary(md_12)
```

```
##
## Call:
## glm(formula = ph_adjusted ~ latgroup, family = "gaussian", data = data_gbl)
##
## Deviance Residuals:
##      Min       1Q   Median       3Q      Max
## -121.838   -28.355    1.119    26.994   130.912
##
## Coefficients:
##              Estimate Std. Error t value Pr(>|t|)
## (Intercept)  208.727      5.350  39.018 < 2e-16 ***
## latgroupsa1   21.479      6.985   3.075  0.00239 **
## latgroupsa2   20.310      7.004   2.900  0.00414 **
## ---
## Signif. codes:  0 '***' 0.001 '**' 0.01 '*' 0.05 '.' 0.1 ' ' 1
##
## (Dispersion parameter for gaussian family taken to be 1573.951)
##
##      Null deviance: 343591  on 209  degrees of freedom
## Residual deviance: 325808  on 207  degrees of freedom
## (16 observations deleted due to missingness)
## AIC: 2146.8
##
## Number of Fisher Scoring iterations: 2
```

```
lrtest(md_12)
```

```
## Likelihood ratio test
##
## Model 1: ph_adjusted ~ latgroup
## Model 2: ph_adjusted ~ 1
##   #Df  LogLik Df  Chisq Pr(>Chisq)
## 1    4 -1069.4
## 2    2 -1075.0 -2  11.16   0.003772 **
## ---
## Signif. codes:  0 '***' 0.001 '**' 0.01 '*' 0.05 '.' 0.1 ' ' 1
```

```
lsmeans_latgroup_ph <- LSD.test(md_12, "latgroup", p.adj="none" )
lsmeans_latgroup_ph
```

```
## $statistics
##      MSerror Df      Mean      CV
##  1573.951 207  224.1524 17.69914
##
## $parameters
##      test p.adjusted name.t ntr alpha
## Fisher-LSD      none latgroup  3 0.05
##
## $means
##      ph_adjusted      std r      LCL      UCL  Min  Max  Q25  Q50  Q75
## ca      208.7273 38.75286 55 198.1808 219.2738 129.2 318.20 176.2 212.2 233.20
## sa1      230.2064 37.08467 78 221.3503 239.0625 125.2 304.45 199.2 235.7 257.95
```

```
## sa2      229.0377 42.73780 77 220.1242 237.9511 107.2 359.95 205.2 226.2 254.20
##
## $comparison
## NULL
##
## $groups
##      ph_adjusted groups
## sa1      230.2064      a
## sa2      229.0377      a
## ca       208.7273      b
##
## attr(,"class")
## [1] "group"
```

### C. Seed setting

```
data_gbl$seed_setting <- as.numeric(data_gbl$seed_setting)
md_13 <- glm(seed_setting ~ latgroup , data = data_gbl, family = binomial(link = "logit"))
summary(md_13)
```

```
##
## Call:
## glm(formula = seed_setting ~ latgroup, family = binomial(link = "logit"),
##      data = data_gbl)
##
## Deviance Residuals:
##      Min       1Q   Median       3Q      Max
## -1.0658  -0.3898  -0.1548  -0.1548   2.9769
##
## Coefficients:
##              Estimate Std. Error z value Pr(>|z|)
## (Intercept)  -0.2683     0.2605  -1.030   0.303
## latgroupsa1  -4.1506     1.0392  -3.994 6.50e-05 ***
## latgroupsa2  -2.2707     0.4977  -4.562 5.06e-06 ***
## ---
## Signif. codes:  0 '***' 0.001 '**' 0.01 '*' 0.05 '.' 0.1 ' ' 1
##
## (Dispersion parameter for binomial family taken to be 1)
##
##      Null deviance: 187.91  on 225  degrees of freedom
## Residual deviance: 135.89  on 223  degrees of freedom
## AIC: 141.89
##
## Number of Fisher Scoring iterations: 7
```

```
lrtest(md_13)
```

```
## Likelihood ratio test
##
## Model 1: seed_setting ~ latgroup
## Model 2: seed_setting ~ 1
##   #Df LogLik Df  Chisq Pr(>Chisq)
## 1    3 -67.943
## 2    1 -93.957 -2 52.027   5.04e-12 ***
```

```
## ---
## Signif. codes:  0 '***' 0.001 '**' 0.01 '*' 0.05 '.' 0.1 ' ' 1

lsmeans_latgroup_ss <- LSD.test(md_13, "latgroup", p.adj="none" )
lsmeans_latgroup_ss

## $statistics
##      MSerror Df      Mean      CV
##    0.6093582 223 0.1460177 534.6023
##
## $parameters
##      test p.adjusted name.t ntr alpha
## Fisher-LSD      none latgroup  3  0.05
##
## $means
##      seed_setting      std r      LCL      UCL Min Max Q25 Q50 Q75
## ca      0.43333333 0.4997174 60  0.23473657 0.6319301  0  1  0  0  1
## sa1      0.01190476 0.1091089 84 -0.15594014 0.1797497  0  1  0  0  0
## sa2      0.07317073 0.2620191 82 -0.09670872 0.2430502  0  1  0  0  0
##
## $comparison
## NULL
##
## $groups
##      seed_setting groups
## ca      0.43333333      a
## sa2      0.07317073      b
## sa1      0.01190476      b
##
## attr(,"class")
## [1] "group"
```

#### D. Growing degree days (Tbase is 10°C)

```
ggdensity(data_gbl$GDD10c,
          main = "Density plot of flowering time",
          xlab = "Flowering Time")
```

```
## Warning: Removed 10 rows containing non-finite values (stat_density).
```

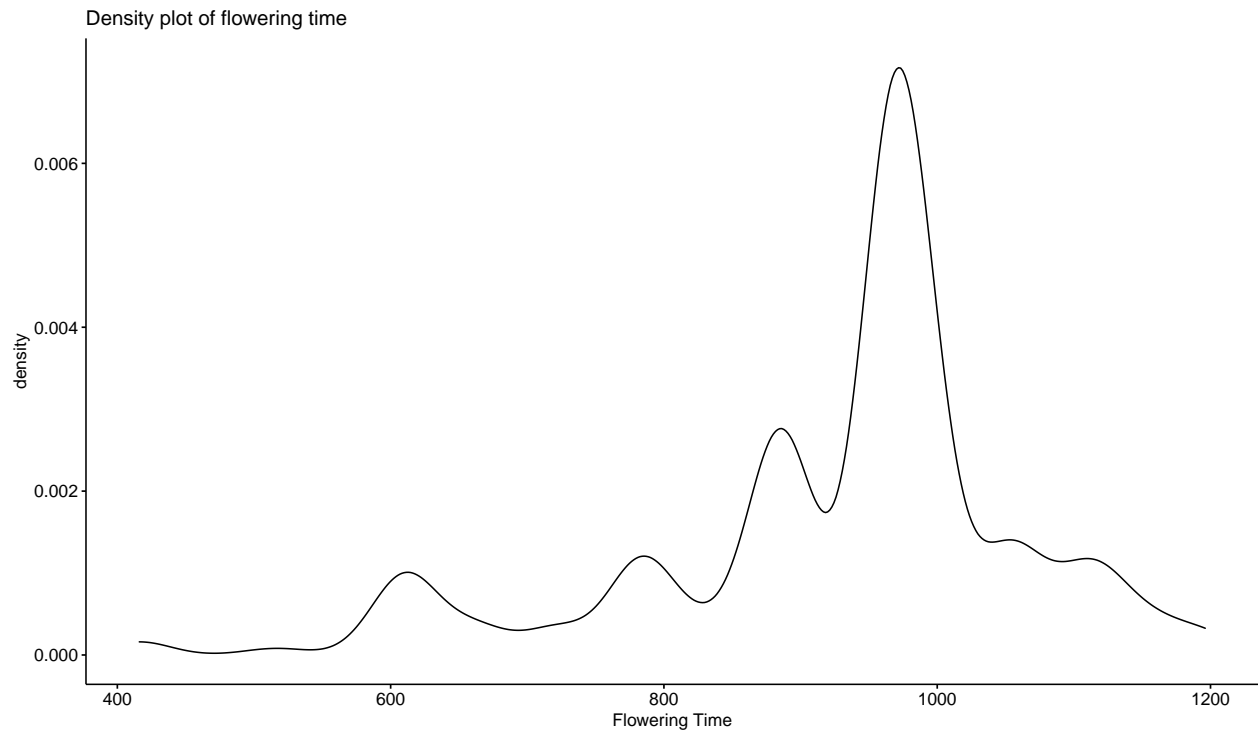

```
ggplot(data = data_gbl, mapping = aes(x = latgroup, y = GDD10c)) +  
  geom_boxplot(outlier.size = -1)+geom_jitter(position=position_jitter(0.2), size=0.4)
```

## Warning: Removed 10 rows containing non-finite values (stat\_boxplot).

## Warning: Removed 10 rows containing missing values (geom\_point).

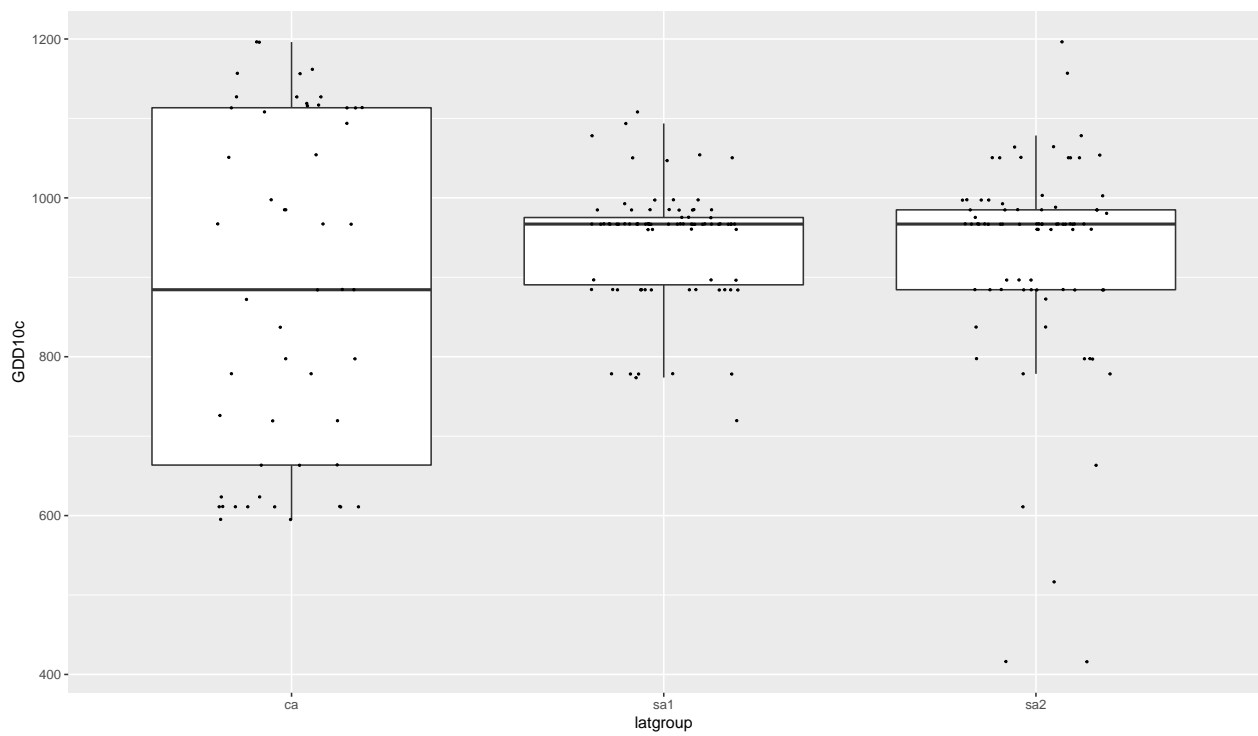

```

md_14 <-glm(GDD10c ~ latgroup , data = data_gbl, family = gaussian)
summary(md_14)

##
## Call:
## glm(formula = GDD10c ~ latgroup, family = gaussian, data = data_gbl)
##
## Deviance Residuals:
##      Min       1Q   Median       3Q      Max
## -513.80   -61.21    21.44    55.05   307.22
##
## Coefficients:
##              Estimate Std. Error t value Pr(>|t|)
## (Intercept)   888.93      19.42  45.772  <2e-16 ***
## latgroupsa1    56.63      24.77   2.287  0.0232 *
## latgroupsa2    40.92      24.89   1.644  0.1016
## ---
## Signif. codes:  0 '***' 0.001 '**' 0.01 '*' 0.05 '.' 0.1 ' ' 1
##
## (Dispersion parameter for gaussian family taken to be 19612.81)
##
##      Null deviance: 4281953  on 215  degrees of freedom
## Residual deviance: 4177529  on 213  degrees of freedom
## (10 observations deleted due to missingness)
## AIC: 2752.9
##
## Number of Fisher Scoring iterations: 2
lrtest(md_14)

## Likelihood ratio test
##
## Model 1: GDD10c ~ latgroup
## Model 2: GDD10c ~ 1
##   #Df  LogLik Df  Chisq Pr(>Chisq)
## 1    4 -1372.5
## 2    2 -1375.1 -2  5.3329    0.0695 .
## ---
## Signif. codes:  0 '***' 0.001 '**' 0.01 '*' 0.05 '.' 0.1 ' ' 1
lsmeans_countries <- LSD.test(md_14, "latgroup", p.adj="none" )
lsmeans_countries

## $statistics
##      MSerror Df      Mean      CV
## 19612.81 213 926.0329 15.12319
##
## $parameters
##      test p.adjusted name.t ntr alpha
## Fisher-LSD      none latgroup 3 0.05
##
## $means
##      GDD10c      std  r      LCL      UCL      Min      Max      Q25      Q50
## ca 888.9250 214.10100 52 850.6433 927.2067 594.90 1196.15 663.600 884.35
## sa1 945.5578 72.53505 83 915.2571 975.8586 719.35 1107.95 890.525 967.00

```



```
## sa2 929.8481 132.67904 81 899.1756 960.5207 416.05 1196.15 884.350 967.00
##      Q75
## ca  1113.45
## sa1  975.25
## sa2  984.90
##
## $comparison
## NULL
##
## $groups
##      GDD10c groups
## sa1 945.5578      a
## sa2 929.8481      ab
## ca  888.9250      b
##
## attr("class")
## [1] "group"
```

## Climatic & Geographical Variables

### A. Temperature

```
ggdensity(data_gbl$temp,
  main = "Density plot of Temperature",
  xlab = "Temperature")
```

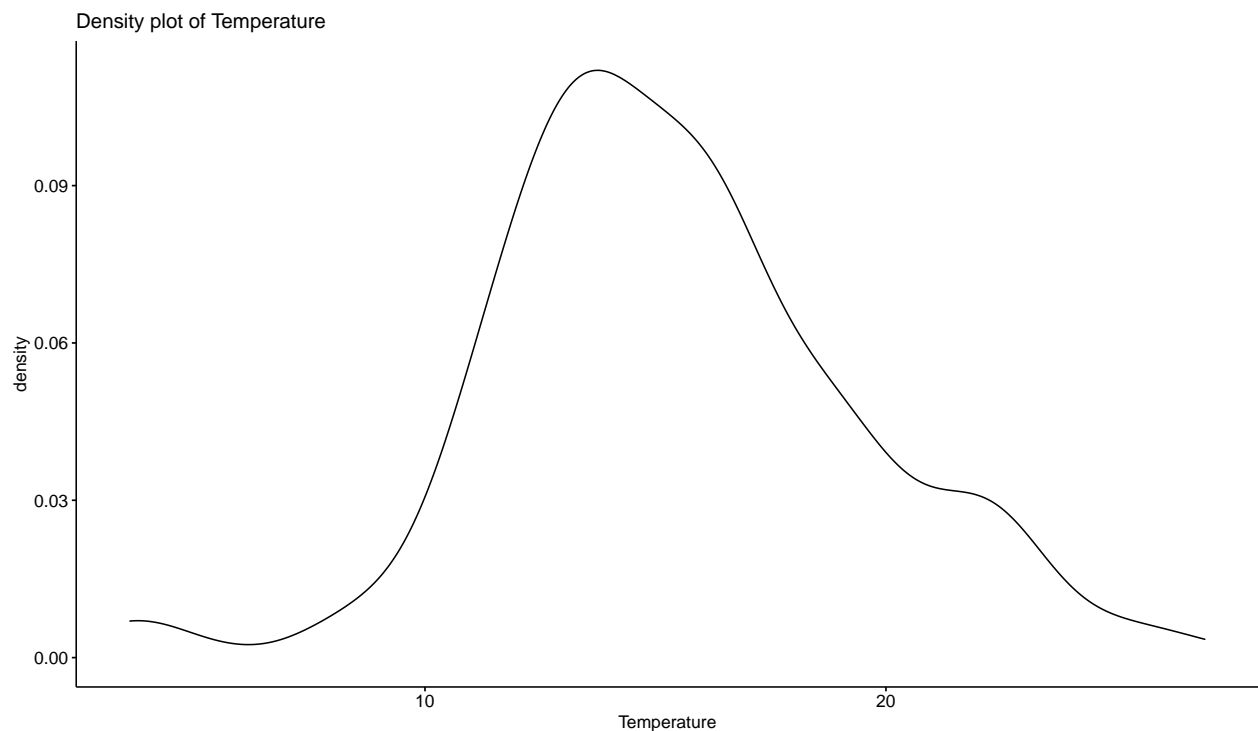

```
ggplot(data = data_gbl, mapping = aes(x = latgroup, y = temp)) +
  geom_boxplot(outlier.size = -1)+geom_jitter(position=position_jitter(0.2), size=0.4)
```

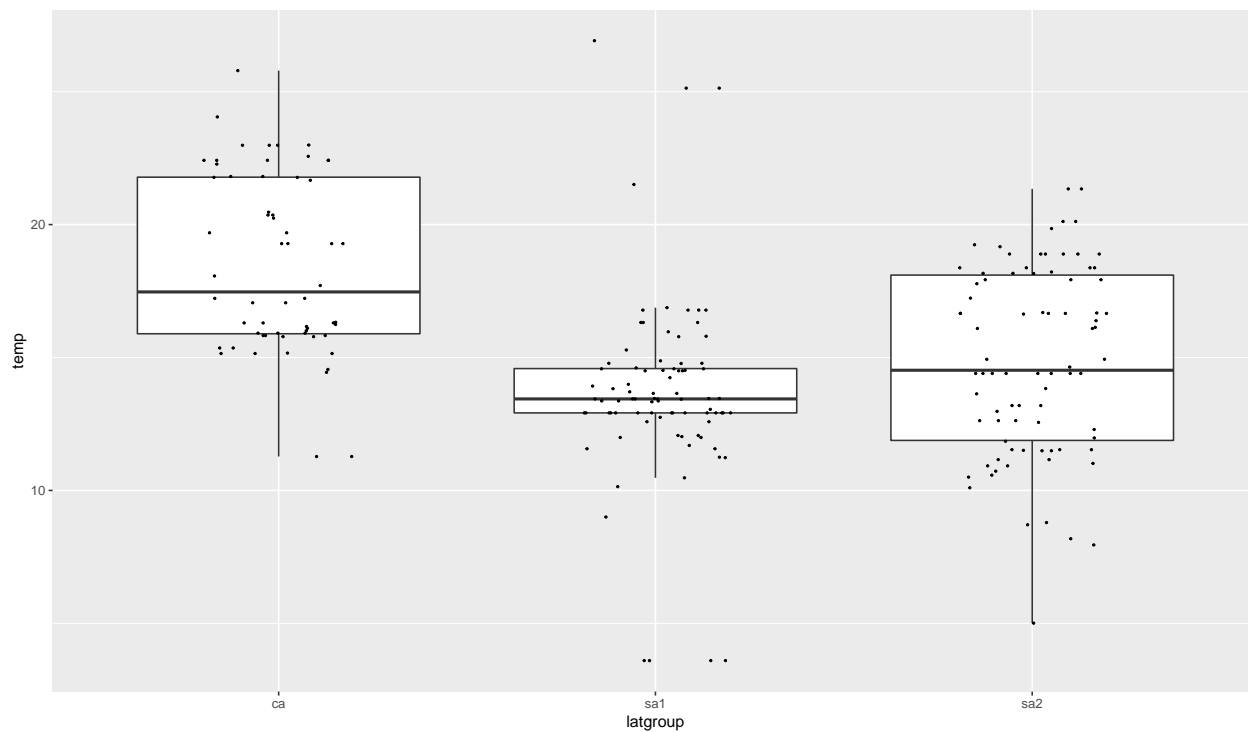

```
md_15 <- glm(temp ~ latgroup, data = data_gbl, family = gaussian)
summary(md_15)
```

```
##
## Call:
## glm(formula = temp ~ latgroup, family = gaussian, data = data_gbl)
##
## Deviance Residuals:
##      Min       1Q   Median       3Q      Max
## -10.0756  -2.2360  -0.2756   2.2494  13.2411
##
## Coefficients:
##              Estimate Std. Error t value Pr(>|t|)
## (Intercept)  18.4872    0.4543  40.691 < 2e-16 ***
## latgroupsa1  -4.8116    0.5949  -8.089 3.85e-14 ***
## latgroupsa2  -3.6262    0.5979  -6.065 5.58e-09 ***
## ---
## Signif. codes:  0 '***' 0.001 '**' 0.01 '*' 0.05 '.' 0.1 ' ' 1
##
## (Dispersion parameter for gaussian family taken to be 12.38515)
##
##      Null deviance: 3607.3  on 225  degrees of freedom
## Residual deviance: 2761.9  on 223  degrees of freedom
## AIC: 1215.1
##
## Number of Fisher Scoring iterations: 2
```

```
lrtest(md_15)
```

```
## Likelihood ratio test
##
## Model 1: temp ~ latgroup
```

```
## Model 2: temp ~ 1
##   #Df LogLik Df   Chisq Pr(>Chisq)
## 1    4 -603.53
## 2    2 -633.71 -2 60.351  7.851e-14 ***
## ---
## Signif. codes:  0 '***' 0.001 '**' 0.01 '*' 0.05 '.' 0.1 ' ' 1

lsmeans_countries_temp <- LSD.test(md_15, "latgroup", p.adj="none" )
lsmeans_countries_temp

## $statistics
##      MSerror Df      Mean      CV
##    12.38515 223 15.38311 22.87739
##
## $parameters
##      test p.adjusted name.t ntr alpha
## Fisher-LSD      none latgroup  3 0.05
##
## $means
##      temp      std  r      LCL      UCL      Min      Max      Q25      Q50
## ca  18.48722 3.323327 60 17.59189 19.38256 11.275000 25.79167 15.89375 17.46667
## sa1 13.67560 3.640788 84 12.91890 14.43229  3.600000 26.91667 12.91667 13.44167
## sa2 14.86098 3.531290 82 14.09511 15.62685  5.008333 21.34167 11.88125 14.52083
##      Q75
## ca  21.78333
## sa1 14.58333
## sa2 18.10000
##
## $comparison
## NULL
##
## $groups
##      temp groups
## ca  18.48722    a
## sa2 14.86098    b
## sa1 13.67560    c
##
## attr(,"class")
## [1] "group"
```

## B. Precipitation

```
ggdensity(data_gbl$prec,
          main = "Density plot of precipitation",
          xlab = "Precipitation yearly average")
```

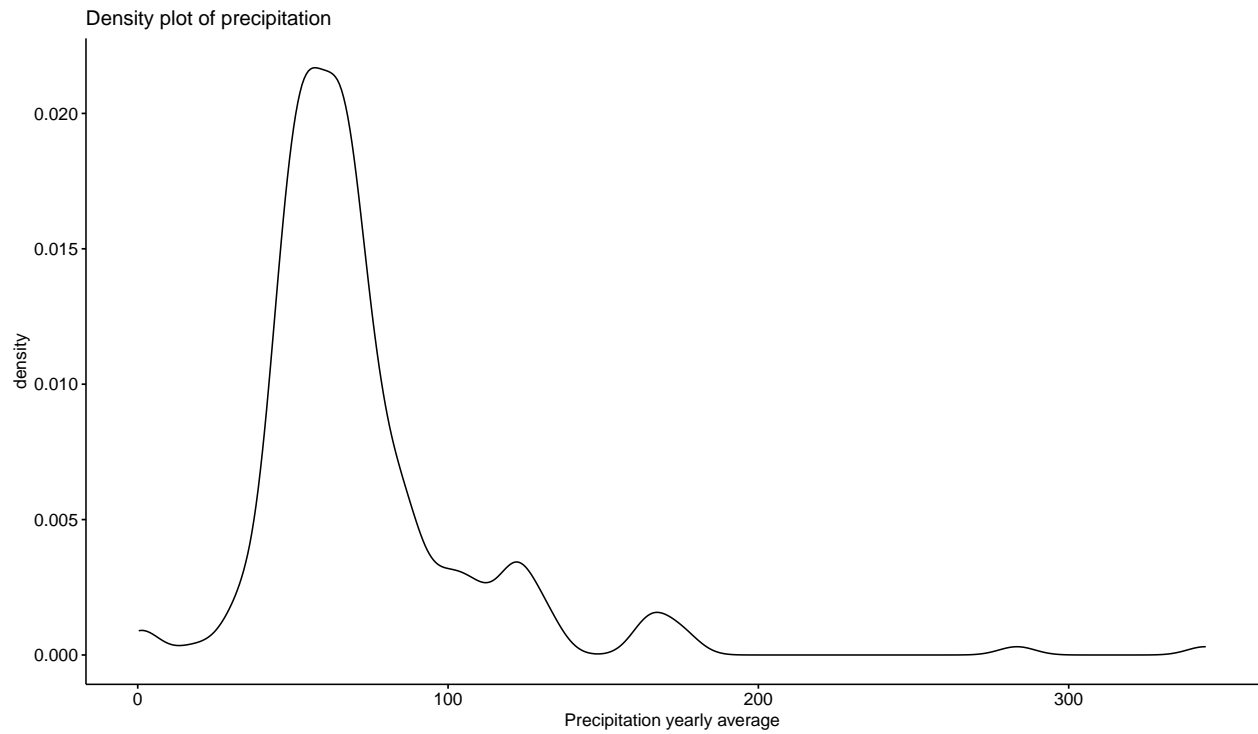

```
ggplot(data = data_gbl, mapping = aes(x = latgroup, y = prec)) +
  geom_boxplot(outlier.size = -1)+geom_jitter(position=position_jitter(0.2), size=0.4)
```

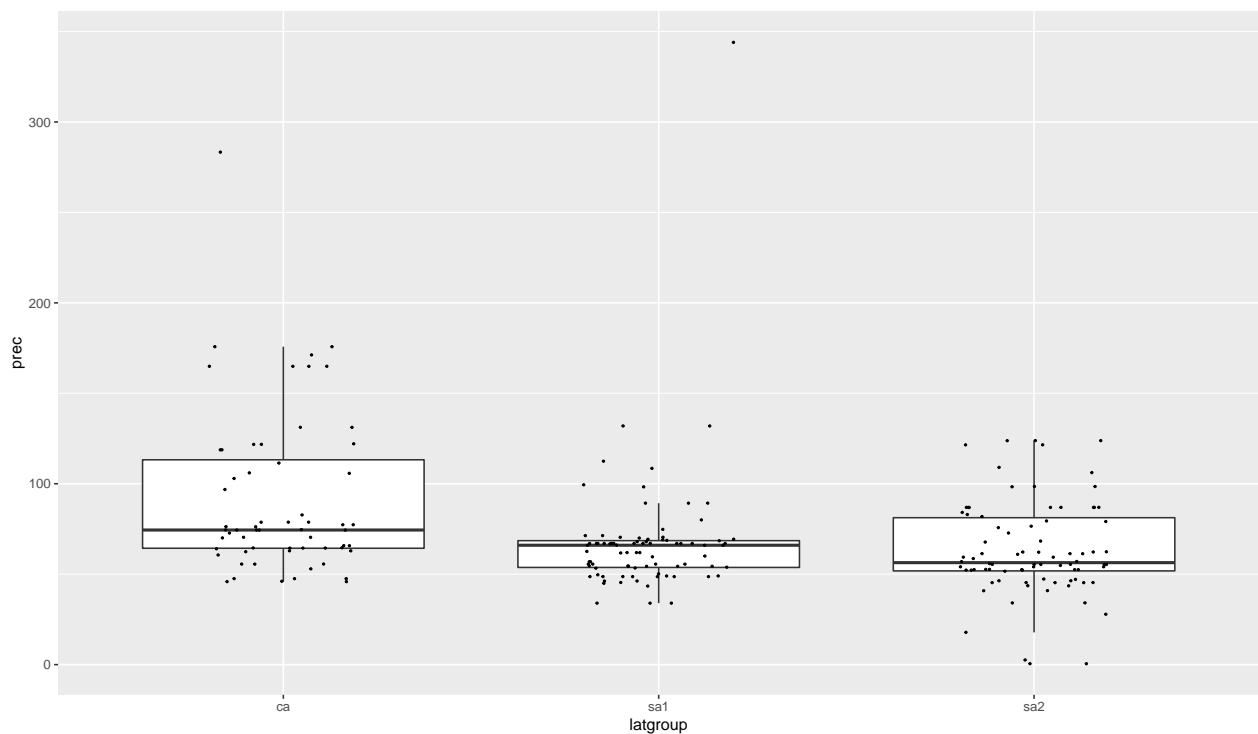

```
md_16 <-glm(prec ~ latgroup , data = data_gbl, family = gaussian)
summary(md_16)
```

```
##
## Call:
```

```
## glm(formula = prec ~ latgroup, family = gaussian, data = data_gbl)
##
## Deviance Residuals:
##      Min       1Q   Median       3Q      Max
## -62.961  -18.128   -8.045    6.807   276.478
##
## Coefficients:
##              Estimate Std. Error t value Pr(>|t|)
## (Intercept)   91.289      4.561  20.015 < 2e-16 ***
## latgroupsa1  -23.767      5.972   -3.980 9.33e-05 ***
## latgroupsa2  -27.828      6.002   -4.636 6.04e-06 ***
## ---
## Signif. codes:  0 '***' 0.001 '**' 0.01 '*' 0.05 '.' 0.1 ' ' 1
##
## (Dispersion parameter for gaussian family taken to be 1248.233)
##
##      Null deviance: 308314  on 225  degrees of freedom
## Residual deviance: 278356  on 223  degrees of freedom
## AIC: 2257.6
##
## Number of Fisher Scoring iterations: 2
```

```
lrtest(md_16)
```

```
## Likelihood ratio test
##
## Model 1: prec ~ latgroup
## Model 2: prec ~ 1
##   #Df LogLik Df  Chisq Pr(>Chisq)
## 1    4 -1124.8
## 2    2 -1136.3 -2 23.101  9.631e-06 ***
## ---
## Signif. codes:  0 '***' 0.001 '**' 0.01 '*' 0.05 '.' 0.1 ' ' 1
```

```
lsmeans_latgroup_prec <- LSD.test(md_16, "latgroup", p.adj="none" )
lsmeans_latgroup_prec
```

```
## $statistics
##      MSerror Df      Mean      CV
## 1248.233 223 72.35841 48.82686
##
## $parameters
##      test p.adjusted name.t ntr alpha
## Fisher-LSD      none latgroup 3 0.05
##
## $means
##      prec      std r      LCL      UCL      Min      Max      Q25      Q50
## ca  91.28889 44.85762 60 82.30046 100.27731 45.83333 283.3333 64.33333 74.41667
## sa1 67.52183 35.47180 84 59.92522 75.11843 34.00000 344.0000 53.72917 66.00000
## sa2 63.46138 26.10546 82 55.77269 71.15007 0.50000 123.8333 51.81250 56.37500
##      Q75
## ca 113.25000
## sa1 68.54167
## sa2 81.22917
##
```

```
## $comparison
## NULL
##
## $groups
##      prec groups
## ca  91.28889    a
## sa1 67.52183    b
## sa2 63.46138    b
##
## attr(,"class")
## [1] "group"
```

### C. Solar Radiation

```
ggdensity(data_gbl$sr,
  main = "Density plot of SR",
  xlab = "Solar Radiation yearly average")
```

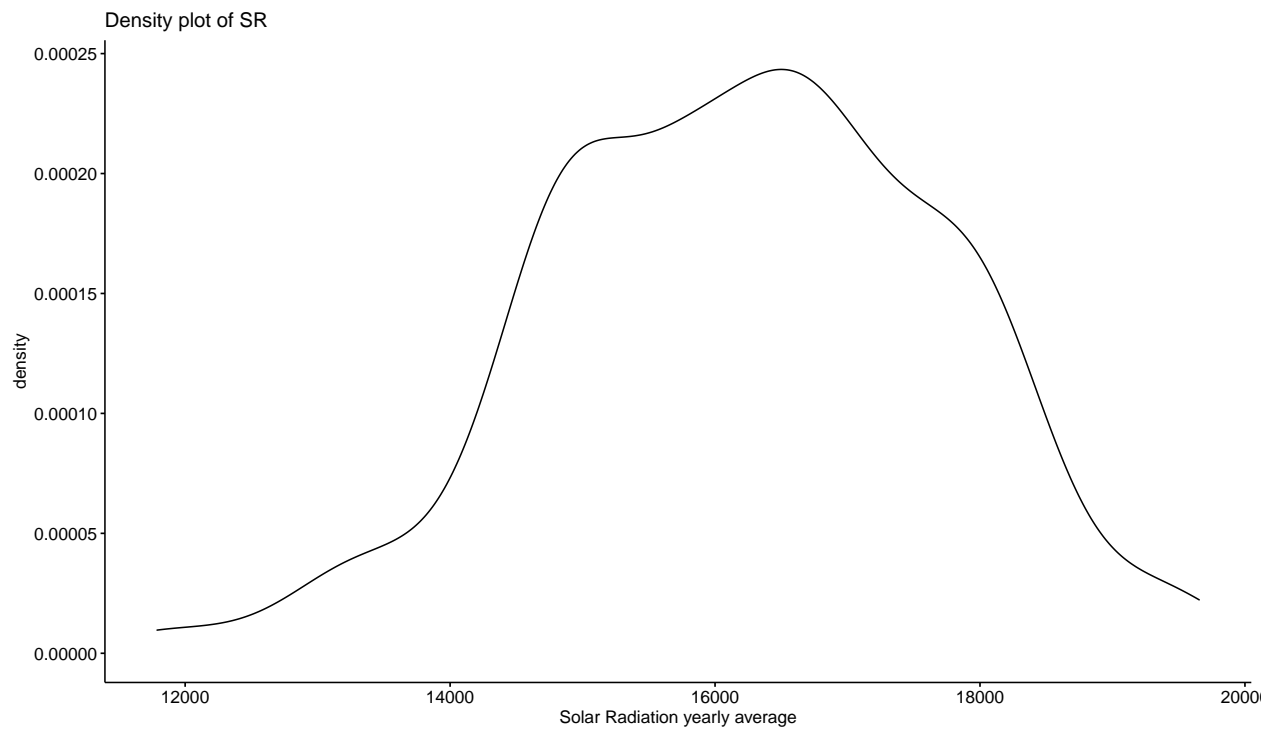

```
ggplot(data = data_gbl, mapping = aes(x = latgroup, y = sr)) +
  geom_boxplot(outlier.size = -1)+geom_jitter(position=position_jitter(0.2), size=0.4)
```

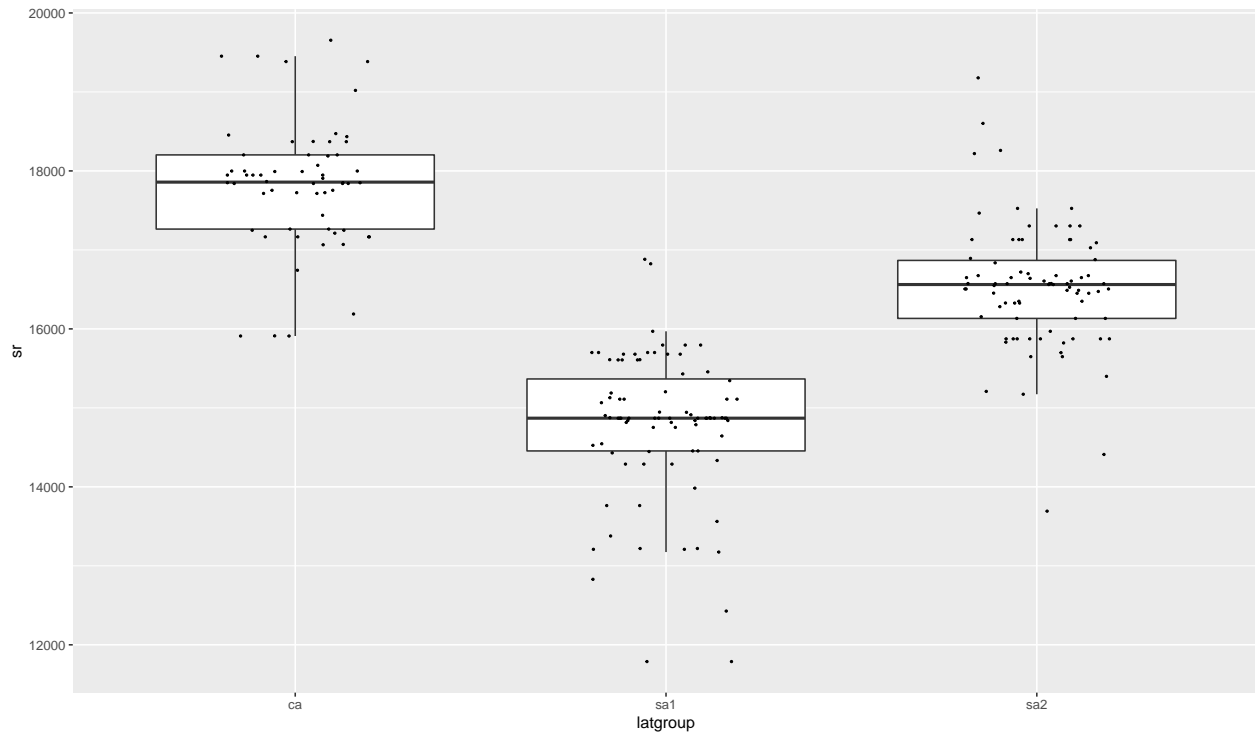

```
md_17 <-glm(sr ~ latgroup , data = data_gbl, family="gaussian")
summary(md_17)
```

```
##
## Call:
## glm(formula = sr ~ latgroup, family = "gaussian", data = data_gbl)
##
## Deviance Residuals:
##      Min       1Q   Median       3Q      Max
## -2984.00  -389.61    70.62   369.67  2650.38
##
## Coefficients:
##              Estimate Std. Error t value Pr(>|t|)
## (Intercept)  17833.1      109.9  162.254  <2e-16 ***
## latgroupsa1  -3061.3      143.9  -21.273  <2e-16 ***
## latgroupsa2  -1305.4      144.6   -9.025  <2e-16 ***
## ---
## Signif. codes:  0 '***' 0.001 '**' 0.01 '*' 0.05 '.' 0.1 ' ' 1
##
## (Dispersion parameter for gaussian family taken to be 724791.6)
##
##      Null deviance: 501678361  on 225  degrees of freedom
## Residual deviance: 161628538  on 223  degrees of freedom
## AIC: 3695.9
##
## Number of Fisher Scoring iterations: 2
```

```
lrtest(md_17)
```

```
## Likelihood ratio test
##
```

```
## Model 1: sr ~ latgroup
## Model 2: sr ~ 1
##   #Df LogLik Df  Chisq Pr(>Chisq)
## 1    4 -1844.0
## 2    2 -1971.9 -2 255.98 < 2.2e-16 ***
## ---
## Signif. codes:  0 '***' 0.001 '**' 0.01 '*' 0.05 '.' 0.1 ' ' 1

lsmeans_latgroup_sr <- LSD.test(md_17, "latgroup", p.adj="none" )
lsmeans_latgroup_sr

## $statistics
##      MSerror Df      Mean      CV
## 724791.6 223 16221.64 5.248217
##
## $parameters
##      test p.adjusted name.t ntr alpha
## Fisher-LSD      none latgroup 3 0.05
##
## $means
##      sr      std r      LCL      UCL      Min      Max      Q25      Q50
## ca 17833.08 800.1958 60 17616.49 18049.68 15909.75 19654.75 17263.58 17858.29
## sa1 14771.83 936.9841 84 14588.78 14954.89 11787.83 16881.00 14454.67 14869.42
## sa2 16527.71 793.3449 82 16342.43 16712.98 13692.25 19178.08 16132.50 16561.50
##      Q75
## ca 18202.75
## sa1 15365.98
## sa2 16866.92
##
## $comparison
## NULL
##
## $groups
##      sr groups
## ca 17833.08 a
## sa2 16527.71 b
## sa1 14771.83 c
##
## attr(,"class")
## [1] "group"
```

#### D. Elevation

```
ggdensity(data_gbl$elevation,
          main = "Density plot of elevation",
          xlab = "Elavations of the genotypes of origin")
```



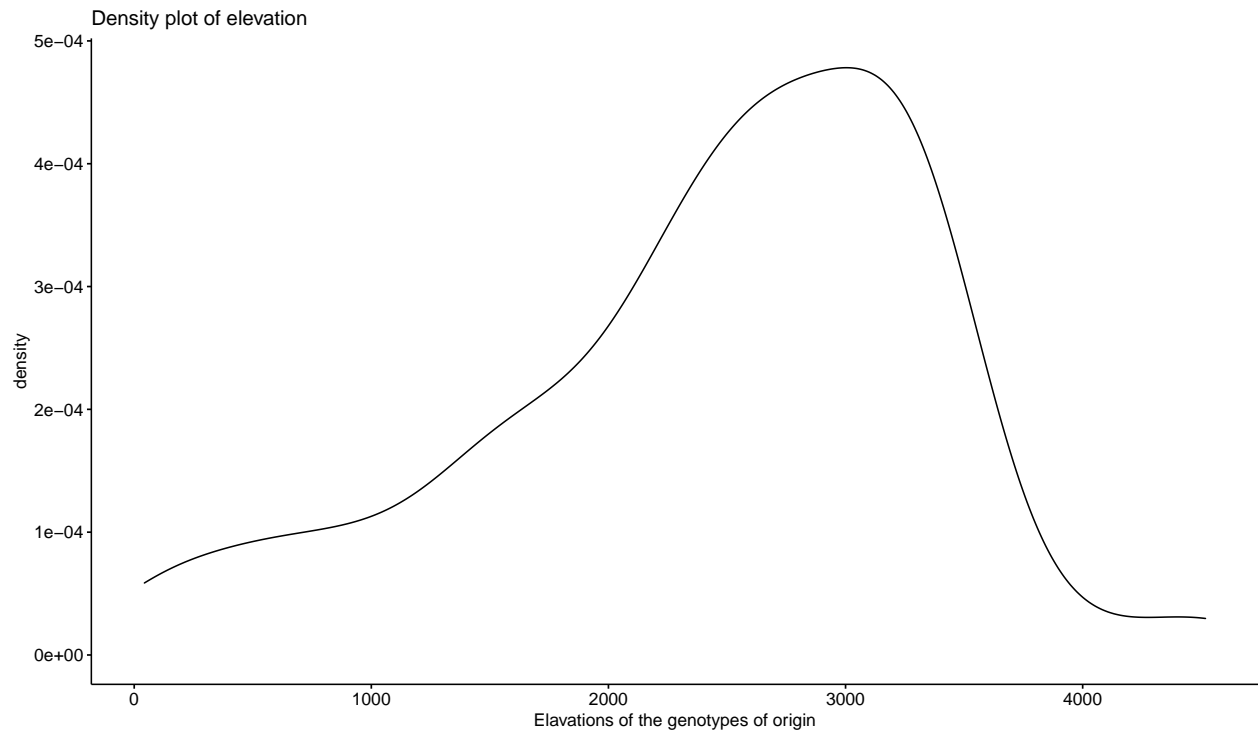

```
ggplot(data = data_gbl, mapping = aes(x = latgroup, y = elevation)) +
  geom_boxplot(outlier.size = -1)+geom_jitter(position=position_jitter(0.2), size=0.4)
```

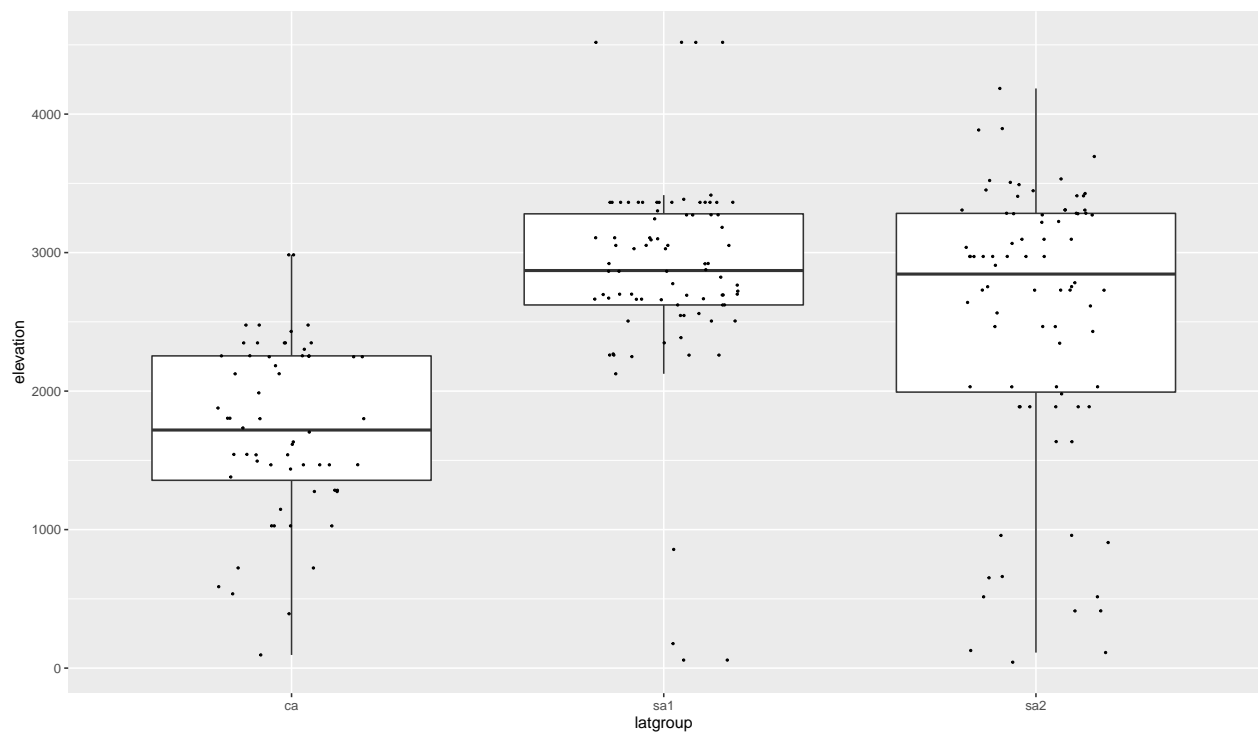

```
md_18 <-glm(elevation ~ latgroup , data =data_gbl, family = "gaussian")
summary(md_18)
```

```
##
## Call:
```

```
## glm(formula = elevation ~ latgroup, family = "gaussian", data = data_gbl)
##
## Deviance Residuals:
##      Min       1Q   Median       3Q      Max
## -2791.23   -332.41    93.44   522.84  1668.77
##
## Coefficients:
##              Estimate Std. Error t value Pr(>|t|)
## (Intercept)   1722.1      107.2   16.057 < 2e-16 ***
## latgroupsa1   1127.1      140.4    8.026 5.71e-14 ***
## latgroupsa2    812.9      141.1    5.759 2.78e-08 ***
## ---
## Signif. codes:  0 '***' 0.001 '**' 0.01 '*' 0.05 '.' 0.1 ' ' 1
##
## (Dispersion parameter for gaussian family taken to be 690146.7)
##
##      Null deviance: 199626032  on 225  degrees of freedom
## Residual deviance: 153902717  on 223  degrees of freedom
## AIC: 3684.8
##
## Number of Fisher Scoring iterations: 2

lrtest(md_18)

## Likelihood ratio test
##
## Model 1: elevation ~ latgroup
## Model 2: elevation ~ 1
##   #Df LogLik Df  Chisq Pr(>Chisq)
## 1    4 -1838.4
## 2    2 -1867.8 -2 58.788  1.715e-13 ***
## ---
## Signif. codes:  0 '***' 0.001 '**' 0.01 '*' 0.05 '.' 0.1 ' ' 1

lsmeans_species_elevation <- LSD.test(md_18, "latgroup", p.adj="none" )
lsmeans_species_elevation

## $statistics
##      MSerror Df      Mean      CV
## 690146.7 223 2435.982 34.10331
##
## $parameters
##      test p.adjusted  name.t ntr alpha
## Fisher-LSD      none latgroup  3 0.05
##
## $means
##      elevation      std r      LCL      UCL Min  Max      Q25      Q50      Q75
## ca  1722.133  630.7224 60 1510.781 1933.485  95 2984 1356.00 1719.0 2254.25
## sa1  2849.226  761.5455 84 2670.601 3027.851  58 4518 2622.00 2870.5 3280.00
## sa2  2534.988 1007.9677 82 2354.197 2715.778  43 4185 1992.75 2845.0 3283.25
##
## $comparison
## NULL
##
## $groups
```

```
##      elevation groups
## sa1  2849.226      a
## sa2  2534.988      b
## ca   1722.133      c
##
## attr(,"class")
## [1] "group"
```

## E. Latitude

```
ggdensity(data_gbl$latitude,
  main = "Density plot of latitude",
  xlab = "Latitudes of the genotypes of origin")
```

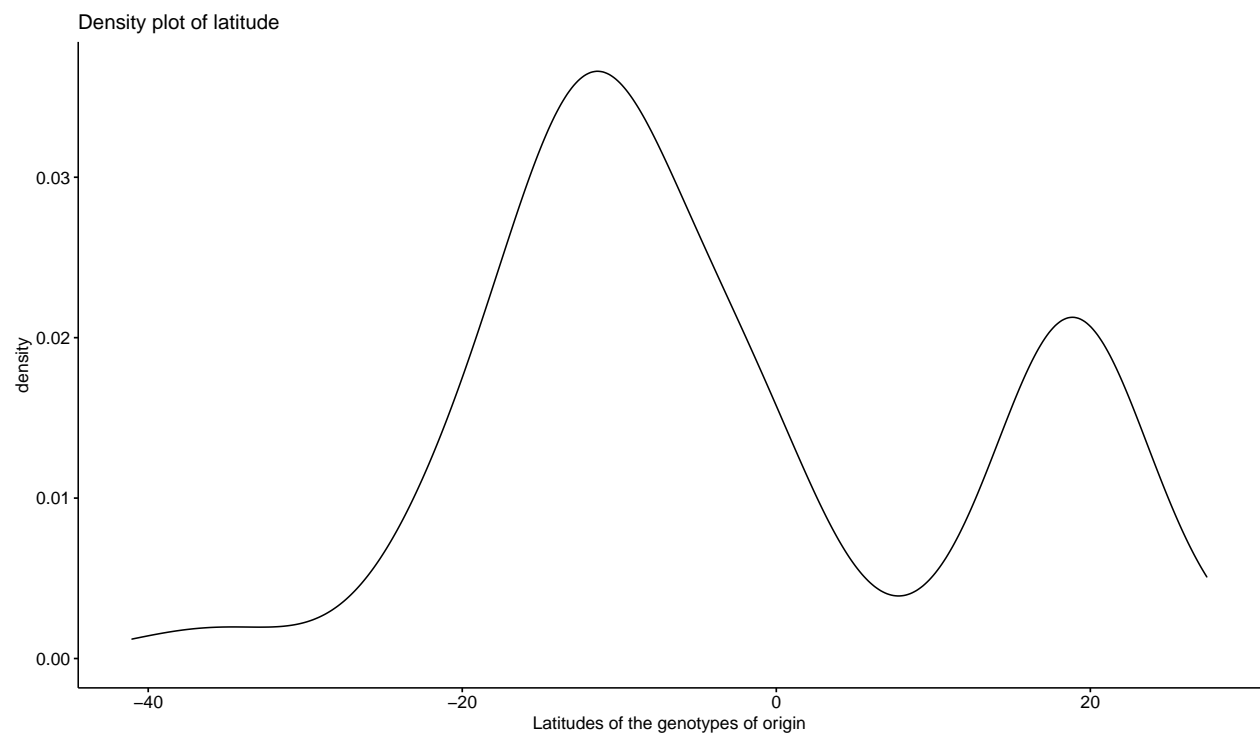

```
ggplot(data = data_gbl, mapping = aes(x = latgroup, y = latitude)) +
  geom_boxplot(outlier.size = -1)+geom_jitter(position=position_jitter(0.2), size=0.4)
```

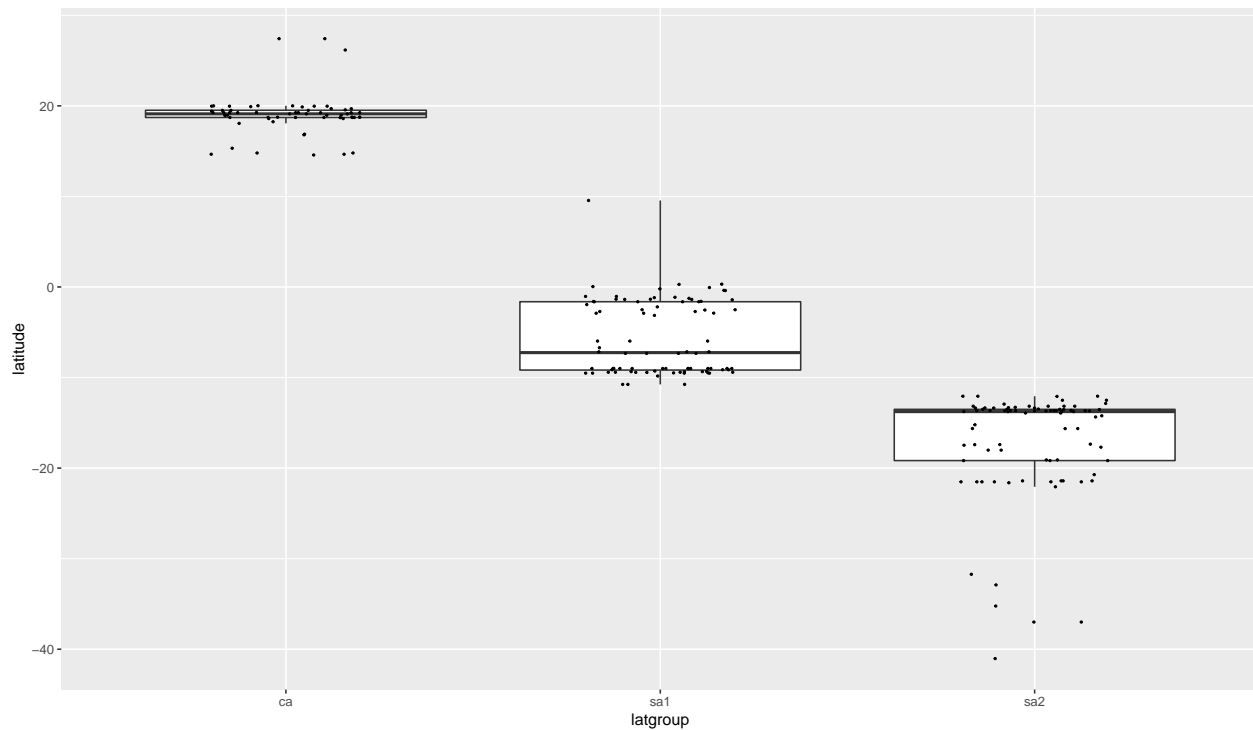

```
md_19 <- glm(latitude ~ latgroup, data = data_gbl, family = gaussian)
summary(md_19)
```

```
##
## Call:
## glm(formula = latitude ~ latgroup, family = gaussian, data = data_gbl)
##
## Deviance Residuals:
##      Min       1Q   Median       3Q      Max
## -23.9120  -3.3662   0.1697   3.4637  15.1842
##
## Coefficients:
##              Estimate Std. Error t value Pr(>|t|)
## (Intercept)  19.0693    0.6002   31.77  <2e-16 ***
## latgroupsa1 -24.7031    0.7859  -31.43  <2e-16 ***
## latgroupsa2 -36.1919    0.7899  -45.82  <2e-16 ***
## ---
## Signif. codes:  0 '***' 0.001 '**' 0.01 '*' 0.05 '.' 0.1 ' ' 1
##
## (Dispersion parameter for gaussian family taken to be 21.61663)
##
##      Null deviance: 50967.7  on 225  degrees of freedom
## Residual deviance:  4820.5  on 223  degrees of freedom
## AIC: 1340.9
##
## Number of Fisher Scoring iterations: 2
```

```
lrtest(md_19)
```

```
## Likelihood ratio test
##
## Model 1: latitude ~ latgroup
```

```
## Model 2: latitude ~ 1
##   #Df LogLik Df  Chisq Pr(>Chisq)
## 1    4 -666.47
## 2    2 -932.96 -2 532.98 < 2.2e-16 ***
## ---
## Signif. codes:  0 '***' 0.001 '**' 0.01 '*' 0.05 '.' 0.1 ' ' 1

lsmeans_latgroup_latitude <- LSD.test(md_19, "latgroup", p.adj="none" )
lsmeans_latgroup_latitude

## $statistics
##      MSerror Df      Mean      CV
##    21.61663 223 -3.243948 -143.3244
##
## $parameters
##      test p.adjusted name.t ntr alpha
## Fisher-LSD      none latgroup  3 0.05
##
## $means
##      latitude      std r      LCL      UCL      Min      Max      Q25
## ca  19.069313 2.336447 60  17.886462  20.252163  14.57172  27.416667  18.71667
## sa1  -5.633817 4.098526 84  -6.633508  -4.634126 -10.75909   9.550365  -9.17522
## sa2 -17.122566 6.190596 82 -18.134375 -16.110757 -41.03454 -12.061098 -19.17081
##      Q50      Q75
## ca  19.116667 19.513842
## sa1  -7.248466 -1.628928
## sa2 -13.761848 -13.511656
##
## $comparison
## NULL
##
## $groups
##      latitude groups
## ca  19.069313      a
## sa1  -5.633817      b
## sa2 -17.122566      c
##
## attr(,"class")
## [1] "group"
```

## F. Longitude

```
ggdensity(data_gbl$longitude,
          main = "Density plot of longitude",
          xlab = "Longitudes of the genotypes country of origin")
```

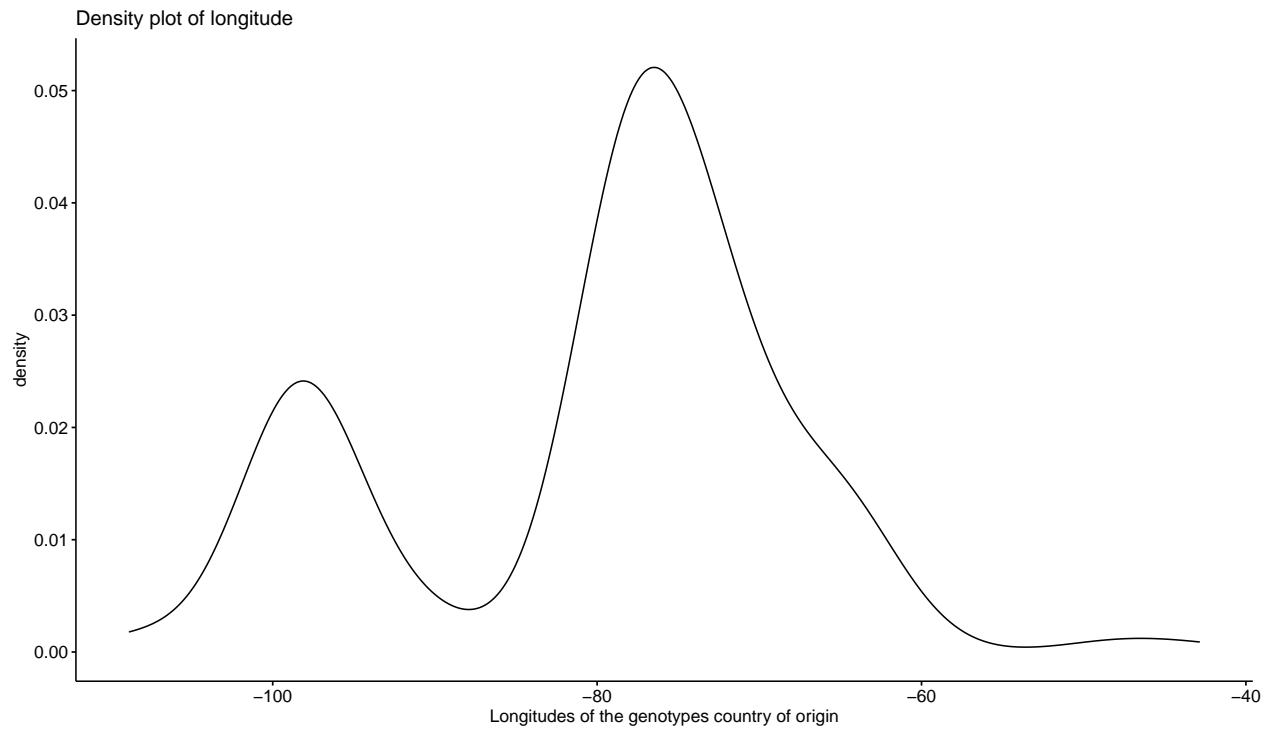

```
ggplot(data = data_gbl, mapping = aes(x = latgroup, y = longitude)) +
  geom_boxplot(outlier.size = -1)+geom_jitter(position=position_jitter(0.2), size=0.4)
```

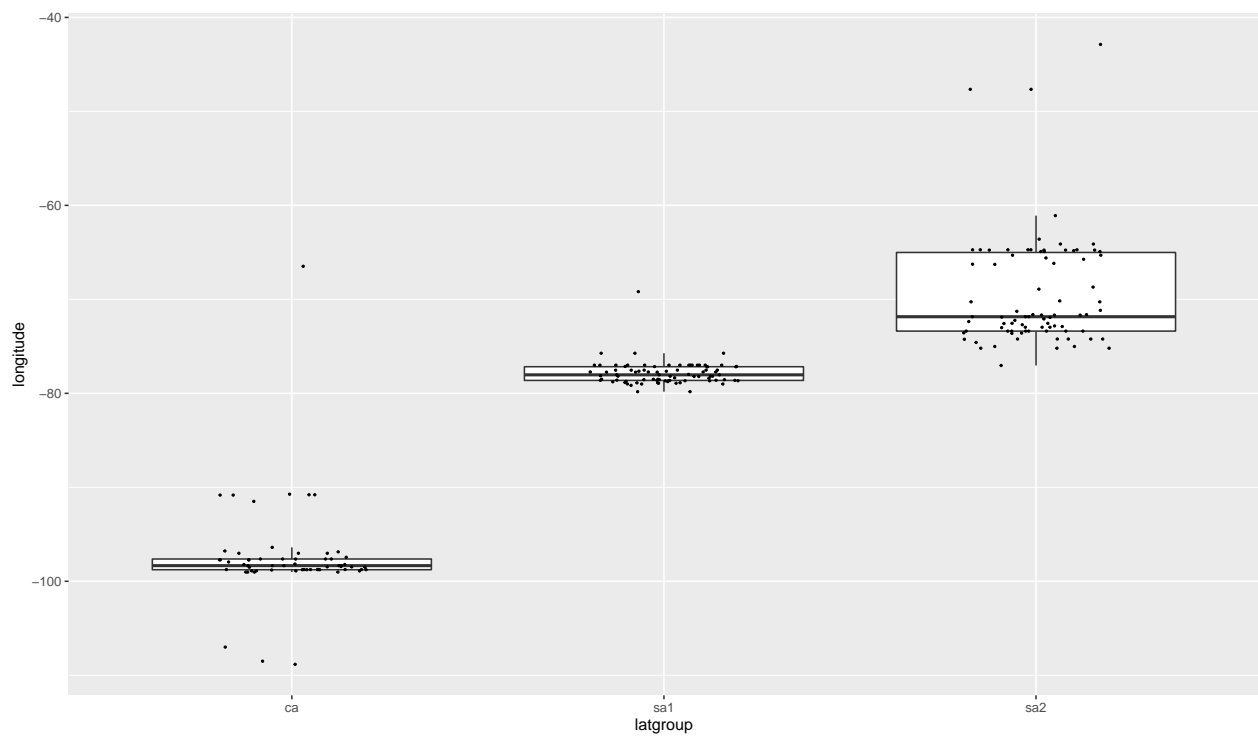

```
md_20 <-glm(longitude ~ latgroup , data = data_gbl, family = gaussian)
summary(md_20)
```

```
##
## Call:
```

```

## glm(formula = longitude ~ latgroup, family = gaussian, data = data_gbl)
##
## Deviance Residuals:
##      Min       1Q   Median       3Q      Max
## -11.3810   -1.5644   -0.7279    0.7087   30.9734
##
## Coefficients:
##              Estimate Std. Error t value Pr(>|t|)
## (Intercept) -97.4523     0.5939 -164.09  <2e-16 ***
## latgroupsa1  19.6006     0.7776  25.21  <2e-16 ***
## latgroupsa2  28.0364     0.7815  35.87  <2e-16 ***
## ---
## Signif. codes:  0 '***' 0.001 '**' 0.01 '*' 0.05 '.' 0.1 ' ' 1
##
## (Dispersion parameter for gaussian family taken to be 21.16251)
##
##      Null deviance: 32567.7  on 225  degrees of freedom
## Residual deviance:  4719.2  on 223  degrees of freedom
## AIC: 1336.1
##
## Number of Fisher Scoring iterations: 2

```

```

lrtest(md_20)

```

```

## Likelihood ratio test
##
## Model 1: longitude ~ latgroup
## Model 2: longitude ~ 1
##   #Df LogLik Df  Chisq Pr(>Chisq)
## 1    4 -664.07
## 2    2 -882.35 -2 436.56 < 2.2e-16 ***
## ---
## Signif. codes:  0 '***' 0.001 '**' 0.01 '*' 0.05 '.' 0.1 ' ' 1

```

```

lsmeans_latgroup_longitude <- LSD.test(md_20, "latgroup", p.adj="none" )
lsmeans_latgroup_longitude

```

```

## $statistics
##      MSerror Df      Mean      CV
## 21.16251 223 -79.99466 -5.750726
##
## $parameters
##      test p.adjusted name.t ntr alpha
## Fisher-LSD      none latgroup  3 0.05
##
## $means
##      longitude      std r      LCL      UCL      Min      Max      Q25
## ca -97.45231 5.226773 60 -98.62267 -96.28195 -108.83333 -66.47890 -98.76667
## sa1 -77.85174 1.279016 84 -78.84087 -76.86260 -79.82561 -69.18047 -78.62430
## sa2 -69.41595 6.056964 82 -70.41707 -68.41482 -77.03616 -42.87518 -73.37850
##      Q50      Q75
## ca -98.33414 -97.62778
## sa1 -78.03183 -77.16731
## sa2 -71.84630 -65.01160
##

```

```
## $comparison
## NULL
##
## $groups
##      longitude groups
## sa2 -69.41595      a
## sa1 -77.85174      b
## ca  -97.45231      c
##
## attr("class")
## [1] "group"
```

### 3. Correlation analysis

```
library(PerformanceAnalytics)
```

```
## Loading required package: xts
##
## Attaching package: 'xts'
## The following objects are masked from 'package:dplyr':
##
##      first, last
##
## Attaching package: 'PerformanceAnalytics'
## The following objects are masked from 'package:agricolae':
##
##      kurtosis, skewness
## The following object is masked from 'package:graphics':
##
##      legend
```

```
dim(data)
```

```
## [1] 254  14
```

I perform correlation analyses using two methods and four different datasets. The methods are Pearson's and Spearman's correlations. If seed setting is involved, Spearman's correlation should be considered. Otherwise, Pearson's.

Datasets are: + Dataset I: All accessions (n=254) + Dataset II: Only within South American accessions (n=181) + Dataset III: Only within Central American group (n=67) + Dataset IV: Only the hypochondriacus accessions within Central American Group (n=32)

#### Dataset I: All accessions

```
names(data)
```

```
## [1] "genotypes" "species" "country" "plot" "seed_setting"
## [6] "ft_adjusted" "ph_adjusted" "longitude" "latitude" "elevation"
## [11] "prec" "temp" "sr" "GDD10c"
```



```
correlation_all_accessions <- dplyr::select(data, seed_setting, ft_adjusted, ph_adjusted, longitude, latitude, elevation, prec)
correlation_all_accessions$longitude <- abs(correlation_all_accessions$longitude)
correlation_all_accessions$latitude <- abs(correlation_all_accessions$latitude)
head(correlation_all_accessions)
```

```
##   seed_setting ft_adjusted ph_adjusted longitude latitude elevation    prec
## 1           1           70      188.95         NA         NA         NA     NA
## 2           0           124      234.95  77.00000  9.00000     3363 67.00000
## 3           0           101      306.95  73.58656 13.69798     3219 79.41667
## 4           0           124      196.95         NA         NA         NA     NA
## 5           1           70      187.95  98.50000 18.75000     1540 70.41667
## 6           0           109      291.95  74.22260 13.16455     2729 45.33333

##      temp      sr  GDD10c
## 1      NA      NA  594.90
## 2 12.91667 14869.42 1047.15
## 3 12.55833 16153.75  872.40
## 4      NA      NA 1047.15
## 5 21.77500 17724.42  594.90
## 6 16.65833 16572.17  960.30
```

```
dim(correlation_all_accessions)
```

```
## [1] 254  10
```

```
chart.Correlation(
  correlation_all_accessions,
  histogram = TRUE,
  method = c("pearson"))
```

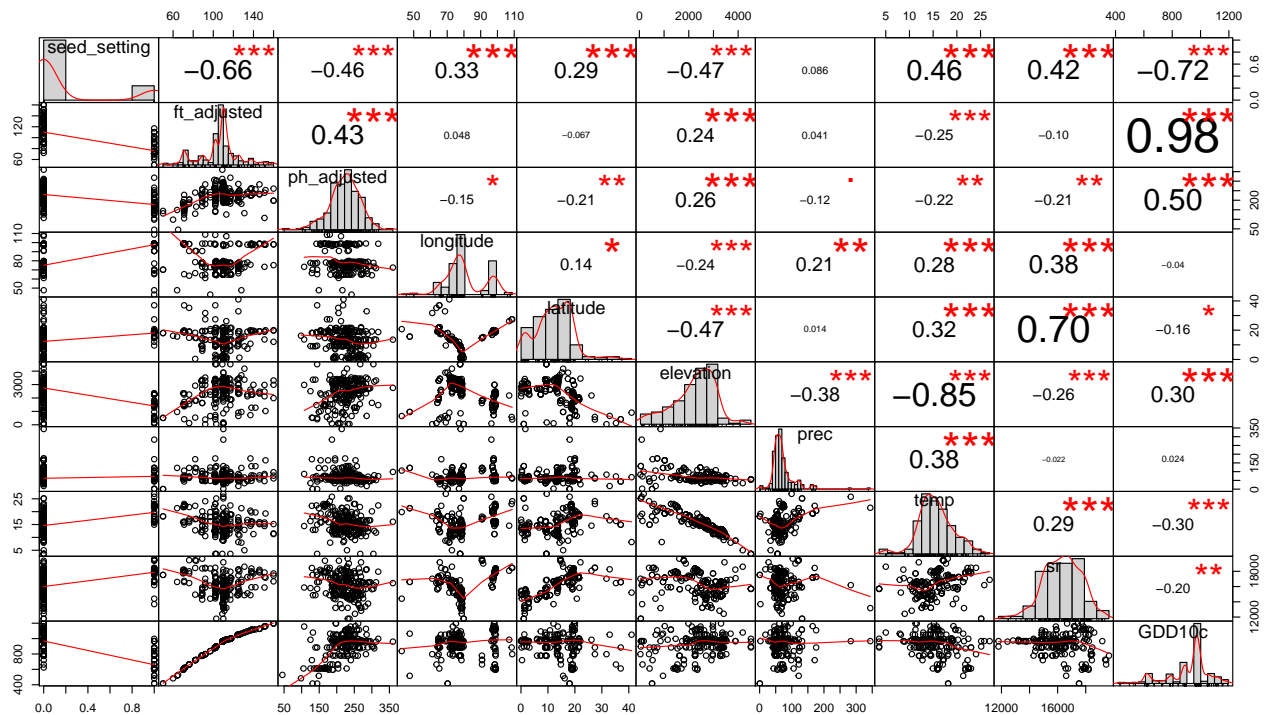

```
chart.Correlation(
  correlation_all_accessions,
  histogram = TRUE,
```

```
method = c("spearman"))
```

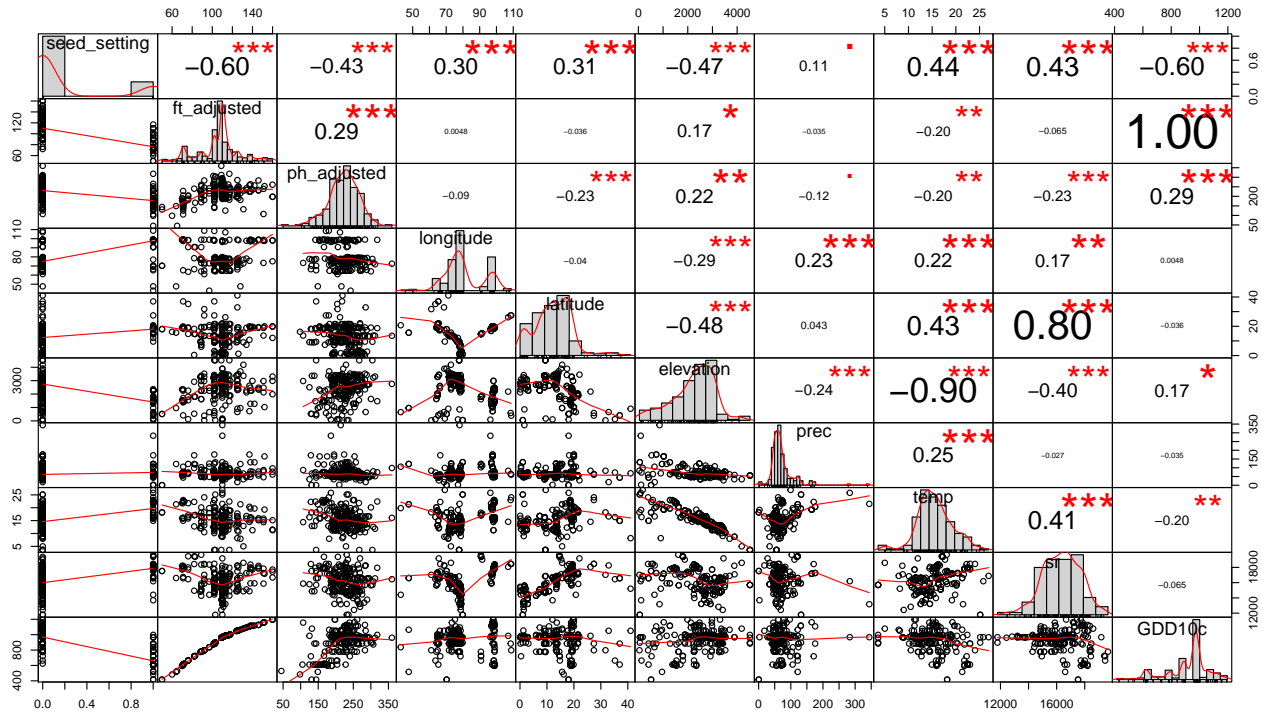

## Dataset II: South American Accessions

Filtering the South American countries

```
table(data$country)
```

```
##
## ARG BOL BRA CHL ECU GER GTM MEX PER PTR USA VEN
## 7 28 5 1 35 1 6 60 104 1 5 1
correlation_south_american <- filter(data, !(country %in% c("GER", "GTM", "MEX", "USA", "PTR")))
dim(correlation_south_american)
```

```
## [1] 181 14
```

```
table(correlation_south_american$country)
```

```
##
## ARG BOL BRA CHL ECU PER VEN
## 7 28 5 1 35 104 1
```

```
correlation_south_american$longitude <- abs(correlation_south_american$longitude)
correlation_south_american$latitude <- abs(correlation_south_american$latitude)
head(correlation_south_american)
```

```
## genotypes species country plot seed_setting ft_adjusted ph_adjusted longitude
## 1 cau_339_y cau PER 102 0 124 234.95 77.00000
## 2 cau_314_y cau PER 103 0 101 306.95 73.58656
## 3 cru_73_n cru PER 105 0 124 196.95 NA
## 4 cau_32_n cau PER 108 0 109 291.95 74.22260
## 5 cau_281_y cau PER 110 0 88 229.95 77.13901
```

```
## 6  cau_59_y      cau      PER  111          0          112      267.95  74.25025
##   latitude elevation      prec      temp      sr  GDD10c
## 1  9.000000      3363 67.00000 12.91667 14869.42 1047.15
## 2 13.697981      3219 79.41667 12.55833 16153.75  872.40
## 3      NA      NA      NA      NA      NA 1047.15
## 4 13.164547      2729 45.33333 16.65833 16572.17  960.30
## 5  9.486735      3273 70.41667 12.06667 14815.58  773.80
## 6 12.931580      2640 40.83333 16.69167 16699.08  980.30
```

```
dim(correlation_south_american)
```

```
## [1] 181  14
```

```
correlation_south_american <- dplyr::select(correlation_south_american, seed_setting, ft_adjusted, ph_a
```

```
str(correlation_south_american)
```

```
## 'data.frame':  181 obs. of  10 variables:
## $ seed_setting: int  0 0 0 0 0 0 0 0 0 0 ...
## $ ft_adjusted : int  124 101 124 109 88 112 109 109 109 109 ...
## $ ph_adjusted : num  235 307 197 292 230 ...
## $ longitude   : num  77 73.6 NA 74.2 77.1 ...
## $ latitude    : num  9 13.7 NA 13.16 9.49 ...
## $ elevation   : int  3363 3219 NA 2729 3273 2640 3309 4518 2754 2865 ...
## $ prec        : num  67 79.4 NA 45.3 70.4 ...
## $ temp        : num  12.9 12.6 NA 16.7 12.1 ...
## $ sr          : num  14869 16154 NA 16572 14816 ...
## $ GDD10c      : num  1047 872 1047 960 774 ...
```

```
library(PerformanceAnalytics)
```

```
chart.Correlation(
  correlation_south_american,
  histogram = TRUE,
  method = c("pearson"))
```

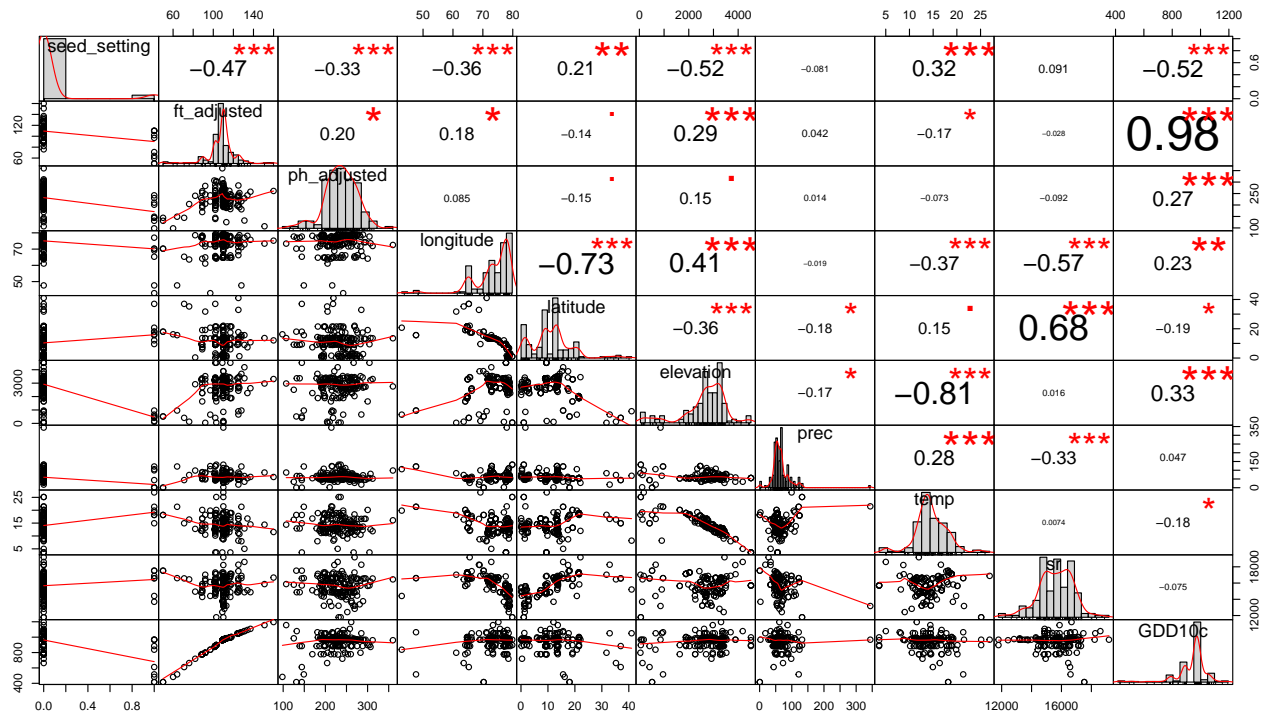

```
chart.Correlation(
  correlation_south_american,
  histogram = TRUE,
  method = c("spearman"))
```

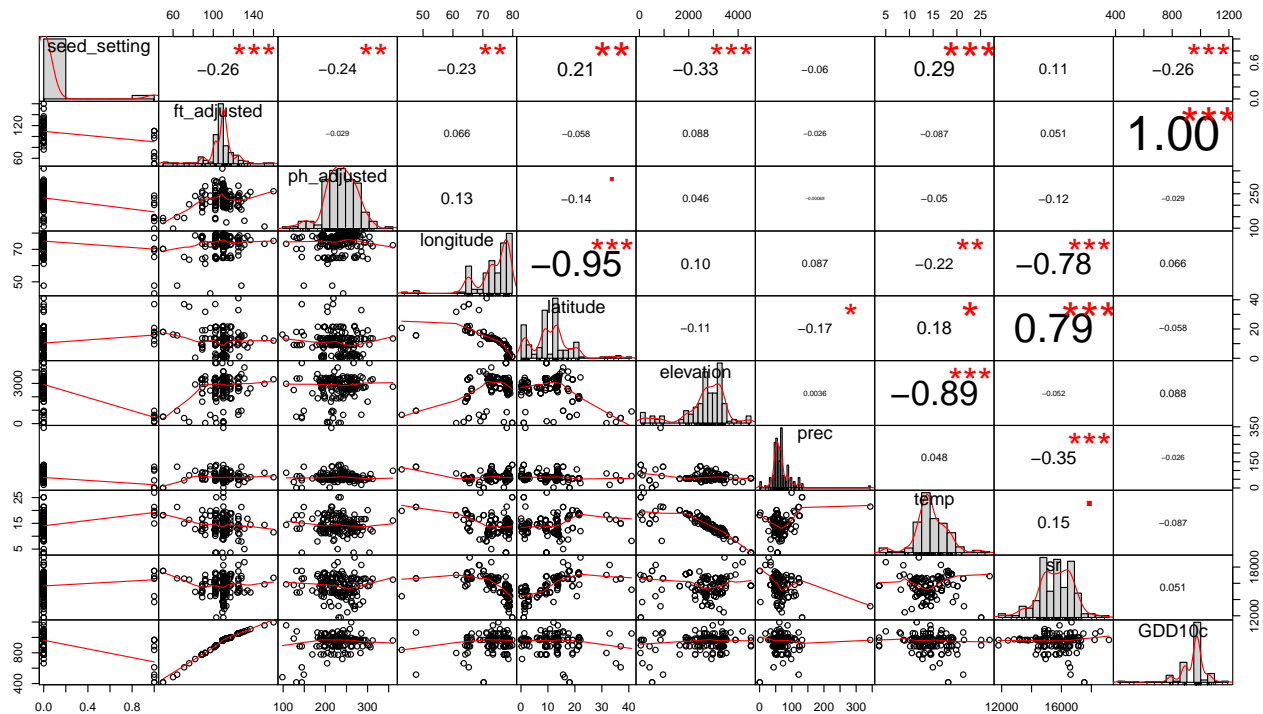

## Dataset III: Central American Accessions

Filtering the South American accessions.

```
table(data$country)
```

```
##
## ARG BOL BRA CHL ECU GER GTM MEX PER PTR USA VEN
##   7  28   5   1  35   1   6  60 104   1   5   1
```

```
correlation_central_american <- filter(data, (country %in% c("GTM", "MEX", "PTR")))
dim(correlation_central_american)
```

```
## [1] 67 14
```

```
table(correlation_central_american$country)
```

```
##
## GTM MEX PTR
##   6  60   1
```

```
correlation_central_american$longitude <- abs(correlation_central_american$longitude)
correlation_central_american$latitude <- abs(correlation_central_american$latitude)
head(correlation_central_american)
```

```
##   genotypes species country plot seed_setting ft_adjusted ph_adjusted
## 1   cru_83_n   cru    MEX  101           1           70      188.95
## 2   cru_78_y   cru    MEX  106           1           70      187.95
## 3 hypo_157_y  hypo    MEX  109           0          137      223.95
## 4 hypo_158_y  hypo    MEX  112           1          101      265.95
## 5   cru_100_y   cru    MEX  116           1           70      176.95
## 6   hypo_174  hypo    MEX  128           0          140      235.70
##   longitude latitude elevation      prec      temp      sr  GDD10c
## 1         NA      NA         NA         NA         NA      NA  594.90
## 2  98.50000 18.75000      1540  70.41667  21.77500 17724.42  594.90
## 3  97.71667 20.00139       723 175.75000  20.35833 17263.58 1107.95
## 4  98.75000 18.75000      1543  76.25000  21.80833 17850.33  872.40
## 5  99.01667 19.25000      2348  55.58333  15.91667 18202.75  594.90
## 6  98.21667 19.68333      2984  77.33333  11.27500 17715.00 1116.80
```

```
dim(correlation_central_american)
```

```
## [1] 67 14
```

```
correlation_central_american <- dplyr::select(correlation_central_american, seed_setting, ft_adjusted, ph_adjusted, longitude, latitude, elevation, prec, temp, sr, GDD10c)
```

```
str(correlation_central_american)
```

```
## 'data.frame':   67 obs. of  10 variables:
## $ seed_setting: int  1 1 0 1 1 0 0 0 0 1 ...
## $ ft_adjusted : int  70 70 137 101 70 140 146 138 160 71 ...
## $ ph_adjusted : num  189 188 224 266 177 ...
## $ longitude   : num  NA 98.5 97.7 98.8 99 ...
## $ latitude    : num  NA 18.8 20 18.8 19.2 ...
## $ elevation   : int  NA 1540 723 1543 2348 2984 2348 2477 2984 NA ...
## $ prec        : num  NA 70.4 175.8 76.2 55.6 ...
## $ temp        : num  NA 21.8 20.4 21.8 15.9 ...
## $ sr          : num  NA 17724 17264 17850 18203 ...
```

```
## $ GDD10c : num 595 595 1108 872 595 ...
```

```
library(PerformanceAnalytics)
```

```
chart.Correlation(
  correlation_central_american,
  histogram = TRUE,
  method = c("pearson"))
```

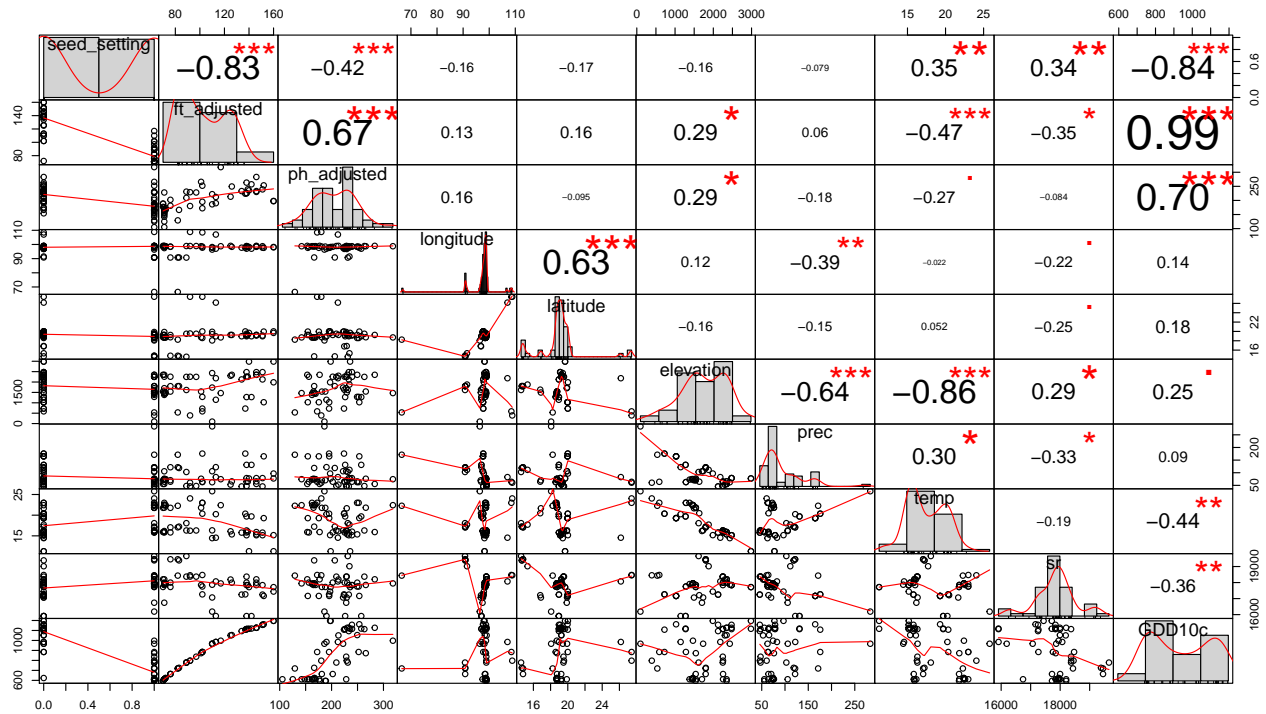

```
chart.Correlation(
  correlation_central_american,
  histogram = TRUE,
  method = c("spearman"))
```

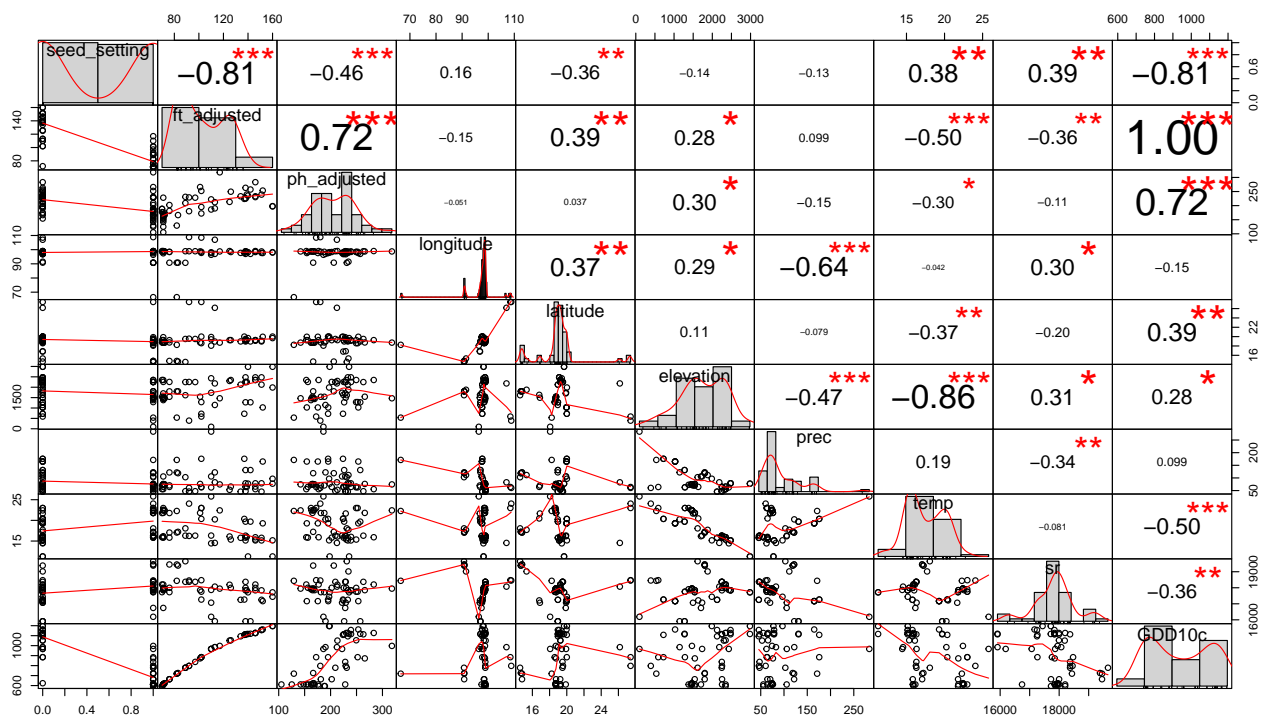

## Dataset IV: Central American *A. hypochondriacus* Accessions

Filtering *A. hypochondriacus* accessions from Central America.

```
correlation_central_american_hypo <- filter(data, (country %in% c("GTM", "MEX", "PTR"))) %>%
  filter(species=="hypo")
dim(correlation_central_american_hypo)
```

```
## [1] 32 14
```

```
table(correlation_central_american_hypo$country)
```

```
##
## MEX PTR
## 31 1
```

```
correlation_central_american_hypo$longitude <- abs(correlation_central_american_hypo$longitude)
correlation_central_american_hypo$latitude <- abs(correlation_central_american_hypo$latitude)
head(correlation_central_american_hypo)
```

```
##   genotypes species country plot seed_setting ft_adjusted ph_adjusted
## 1 hypo_157_y    hypo     MEX  109           0         137      223.95
## 2 hypo_158_y    hypo     MEX  112           1         101      265.95
## 3 hypo_174     hypo     MEX  128           0         140      235.70
## 4 hypo_146_y    hypo     MEX  201           0         146      230.20
## 5 hypo_148_y    hypo     MEX  202           0         138         NA
## 6 hypo_170_n    hypo     MEX  214           0         160      198.20
##   longitude latitude elevation      prec      temp      sr  GDD10c
## 1  97.71667 20.00139      723 175.75000 20.35833 17263.58 1107.95
## 2  98.75000 18.75000     1543  76.25000 21.80833 17850.33  872.40
## 3  98.21667 19.68333     2984  77.33333 11.27500 17715.00 1116.80
## 4  98.33333 19.25000     2348  65.75000 15.35833 17992.25 1126.95
```

```
## 5  98.76667 19.11667      2477  78.75000 15.15000 17840.83 1113.45
## 6  98.21667 19.68333      2984  77.33333 11.27500 17715.00 1196.15
```

```
dim(correlation_central_american_hypo)
```

```
## [1] 32 14
```

```
correlation_central_american_hypo <- dplyr::select(correlation_central_american_hypo, seed_setting, ft_
```

```
str(correlation_central_american_hypo)
```

```
## 'data.frame':  32 obs. of  10 variables:
## $ seed_setting: int  0 1 0 0 0 0 0 1 1 0 ...
## $ ft_adjusted : int  137 101 140 146 138 160 138 117 89 134 ...
## $ ph_adjusted : num  224 266 236 230 NA ...
## $ longitude   : num  97.7 98.8 98.2 98.3 98.8 ...
## $ latitude    : num  20 18.8 19.7 19.2 19.1 ...
## $ elevation   : int  723 1543 2984 2348 2477 2984 1275 1468 NA 2125 ...
## $ prec        : num  175.8 76.2 77.3 65.8 78.8 ...
## $ temp        : num  20.4 21.8 11.3 15.4 15.2 ...
## $ sr          : num  17264 17850 17715 17992 17841 ...
## $ GDD10c      : num  1108 872 1117 1127 1113 ...
```

```
dim(correlation_central_american_hypo)
```

```
## [1] 32 10
```

```
library(PerformanceAnalytics)
```

```
chart.Correlation(
  correlation_central_american_hypo,
  histogram = TRUE,
  method = c("pearson"))
```

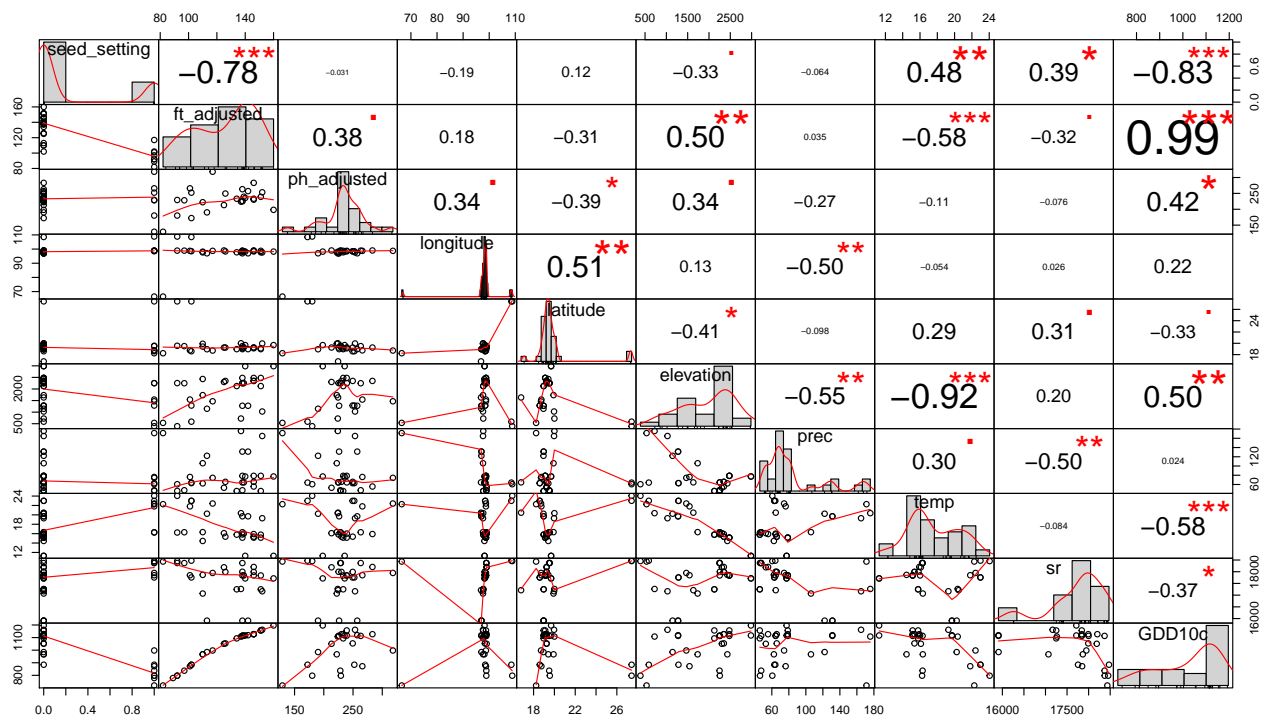



```
chart.Correlation(
  correlation_central_american_hypo,
  histogram = TRUE,
  method = c("spearman"))
```

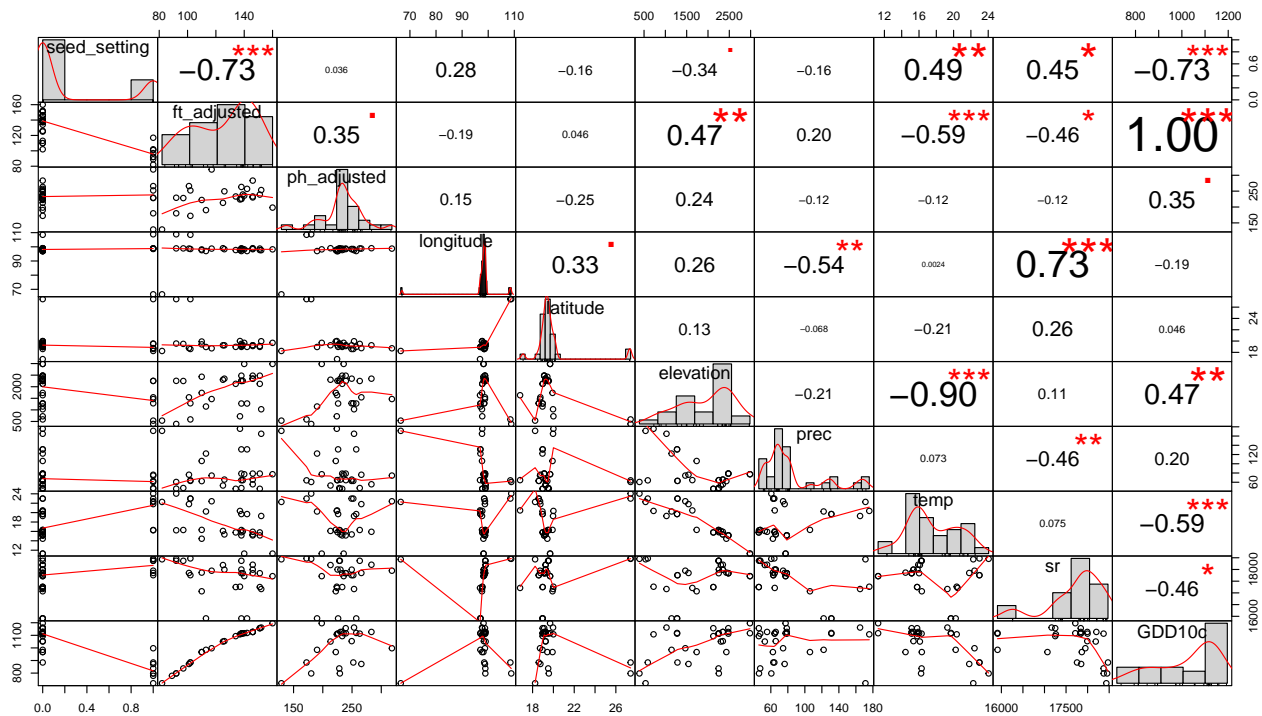

## 4. Focus on Central American Accessions

We clearly see that Central America is the center of flowering time and seed setting.

```
central_american <- filter(data, (country %in% c("GTM", "MEX", "PTR")))
table(central_american$species)
```

```
##
```

```
## cru hdus hybr hypo
```

```
## 25 6 4 32
```

```
central_american_plot <- ggplot(central_american, aes(x=ft_adjusted, fill=factor(species)), stat="count") +
  geom_histogram(color="black", binwidth = 7) +
  scale_x_continuous(breaks = scales::pretty_breaks(n = 10)) +
  #scale_y_continuous(expand = expand_scale(mult = 0, add = 0.1)) +
  labs(y="Count", x="Flowering Time [days]") +
```

```
theme(axis.text.x = element_text(colour = "grey20", size = 4.5, hjust = 0.5, vjust = 0.5),
      axis.text.y = element_text(colour = "grey20", size = 4.5),
      text = element_text(size = 5), legend.position=c(0.9, 0.9),
      panel.spacing = unit(1.0, "lines"),
      legend.title = element_text(size=5, face="bold"),
      legend.key.size = unit(4, "mm"),
      legend.text=element_text(size=5)) +
  scale_fill_discrete(name = "Species", labels=c("cru", "hypo", "hdus", "hybr")) +
```

```
scale_color_discrete(name = "Species", labels=c("cru","hypo", "hdus", "hybr"))+
theme_classic()
```

```
central_american_plot
```

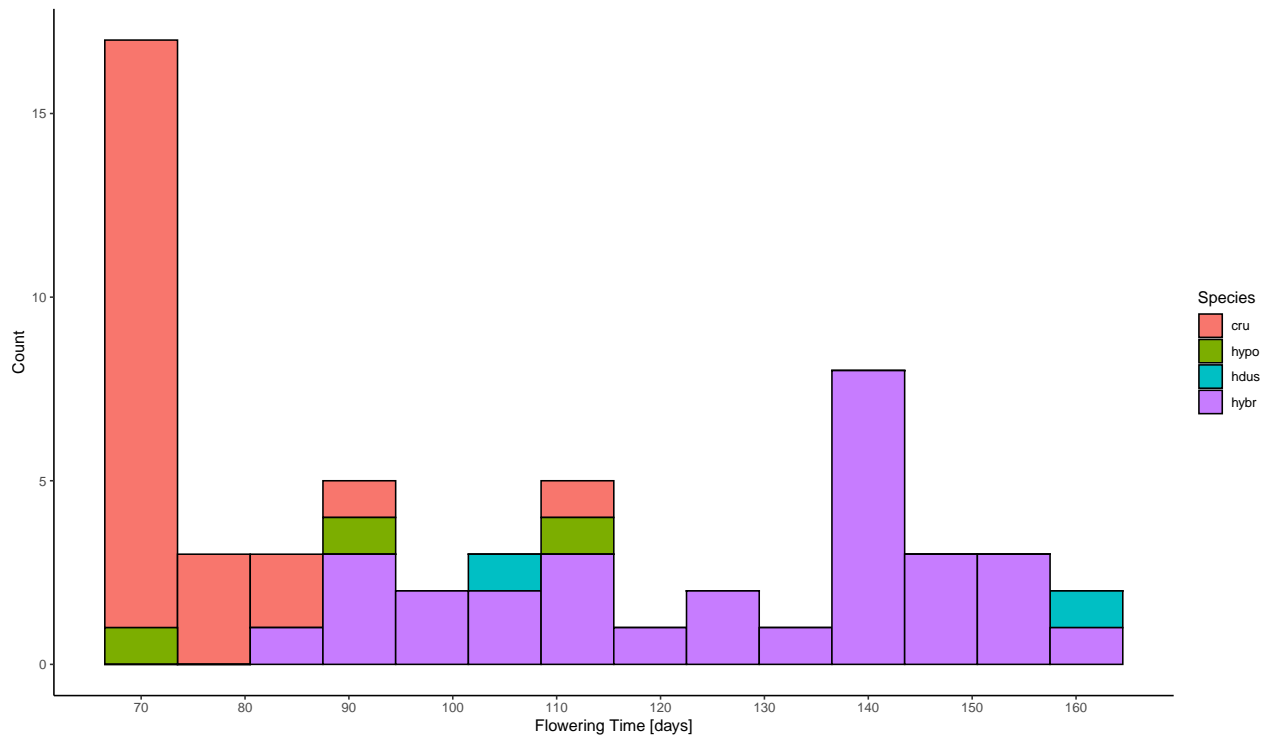

```
#ggsave(ca_grain_plot, device = "jpeg", path = NULL, scale = 1, width = 7.5, height = 6.3, units = "cm")
```

There is a clear flowering time difference between the species. Also, *A. cruentus* shows a narrow distribution and *A. hypochondriacus* shows very wide distribution.

I want to compare the seed setting and non-setting accessions of Central America in terms of phenotype traits and environmental variables.

```
central_american$seed_setting <- as.factor(central_american$seed_setting)
```

## Phenotypic traits

### A. Flowering time

```
ggdensity(central_american$ft_adjusted,
  main = "Density plot of flowering time",
  xlab = "flowering time")
```

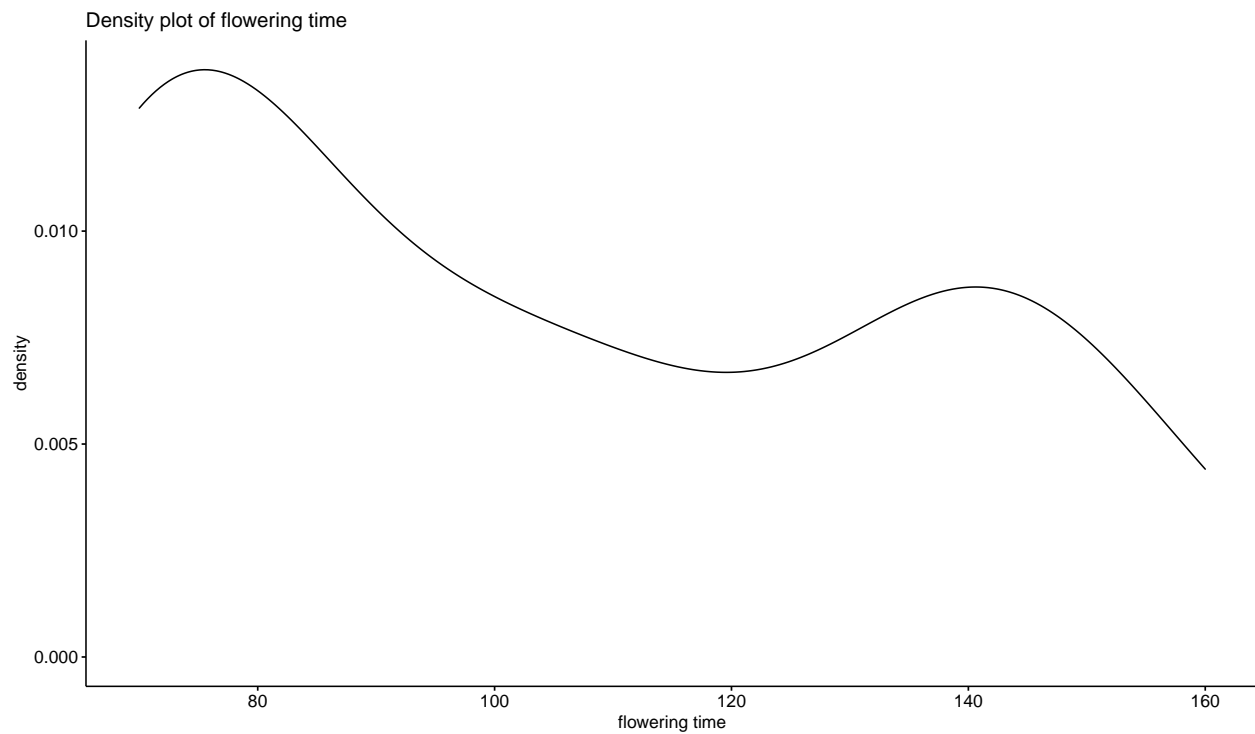

```
ggplot(data = central_american, mapping = aes(x = seed_setting, y = ft_adjusted)) +  
  geom_boxplot(outlier.size = -1)+geom_jitter(position=position_jitter(0.2), size=0.4)
```

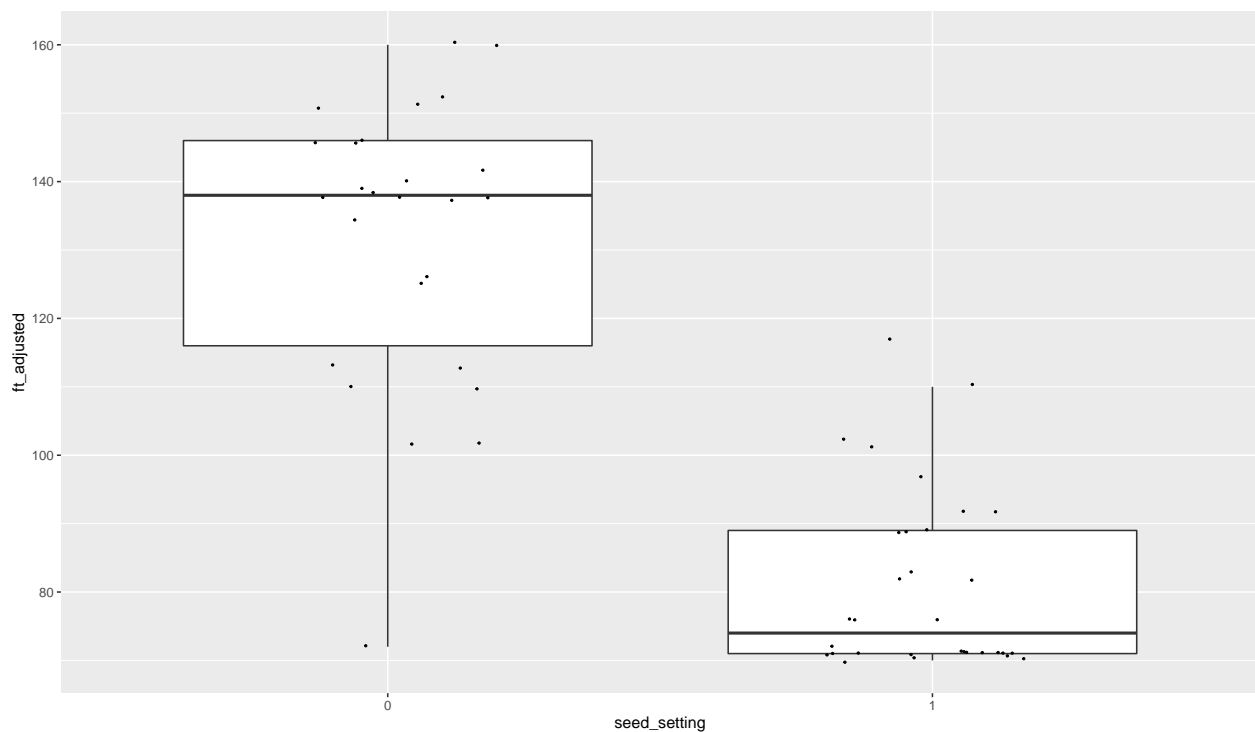

```
md_21 <-glm(ft_adjusted ~ seed_setting , data = central_american, family = gaussian)  
summary(md_21)
```

```
##  
## Call:
```

```
## glm(formula = ft_adjusted ~ seed_setting, family = gaussian,
##      data = central_american)
##
## Deviance Residuals:
##      Min       1Q   Median       3Q      Max
## -59.885  -9.844   1.156  10.896  36.156
##
## Coefficients:
##              Estimate Std. Error t value Pr(>|t|)
## (Intercept)    131.885      3.339   39.50 < 2e-16 ***
## seed_setting1  -51.041      4.495  -11.36 3.75e-16 ***
## ---
## Signif. codes:  0 '***' 0.001 '**' 0.01 '*' 0.05 '.' 0.1 ' ' 1
##
## (Dispersion parameter for gaussian family taken to be 289.837)
##
##      Null deviance: 53602  on 57  degrees of freedom
## Residual deviance: 16231  on 56  degrees of freedom
## (9 observations deleted due to missingness)
## AIC: 497.38
##
## Number of Fisher Scoring iterations: 2
```

```
lrtest(md_21)
```

```
## Likelihood ratio test
##
## Model 1: ft_adjusted ~ seed_setting
## Model 2: ft_adjusted ~ 1
##   #Df LogLik Df Chisq Pr(>Chisq)
## 1    3 -245.69
## 2    2 -280.34 -1 69.29 < 2.2e-16 ***
## ---
## Signif. codes:  0 '***' 0.001 '**' 0.01 '*' 0.05 '.' 0.1 ' ' 1
```

```
lsmeans_ss_ft <- LSD.test(md_21, "seed_setting", p.adj="none" )
lsmeans_ss_ft
```

```
## $statistics
##      MSerror Df      Mean      CV
##    289.837 56 103.7241 16.41334
##
## $parameters
##      test p.adjusted      name.t ntr alpha
## Fisher-LSD      none seed_setting  2 0.05
##
## $means
##   ft_adjusted      std r      LCL      UCL Min Max Q25 Q50 Q75
## 0    131.88462 20.82177 26 125.19620 138.57303  72 160 116 138 146
## 1     80.84375 13.18873 32  74.81489  86.87261  70 117  71  74  89
##
## $comparison
## NULL
##
## $groups
```

```
##   ft_adjusted groups
## 0   131.88462     a
## 1    80.84375     b
##
## attr(,"class")
## [1] "group"
```

## B. Plant height

```
ggdensity(central_american$ph_adjusted,
  main = "Density plot of plant height",
  xlab = "Plant height")
```

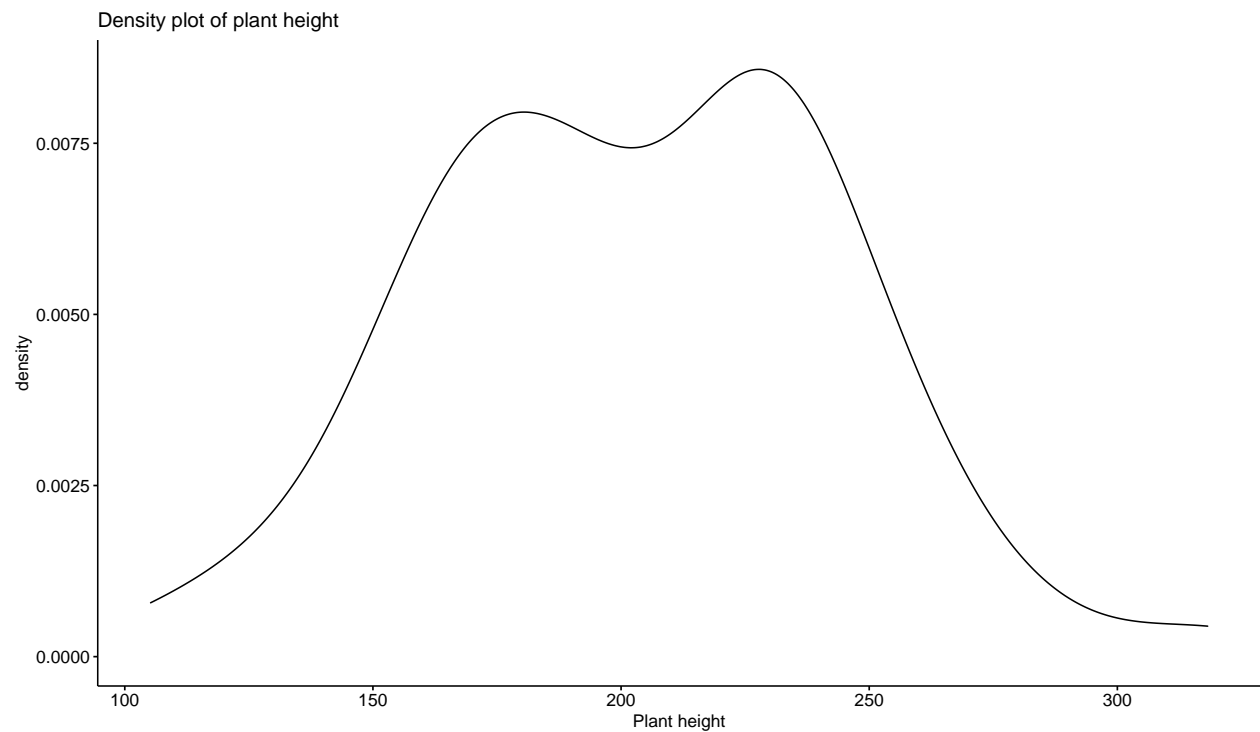

```
ggplot(data = central_american, mapping = aes(x = seed_setting, y = ph_adjusted)) +
  geom_boxplot(outlier.size = -1)+geom_jitter(position=position_jitter(0.2), size=0.4)
```

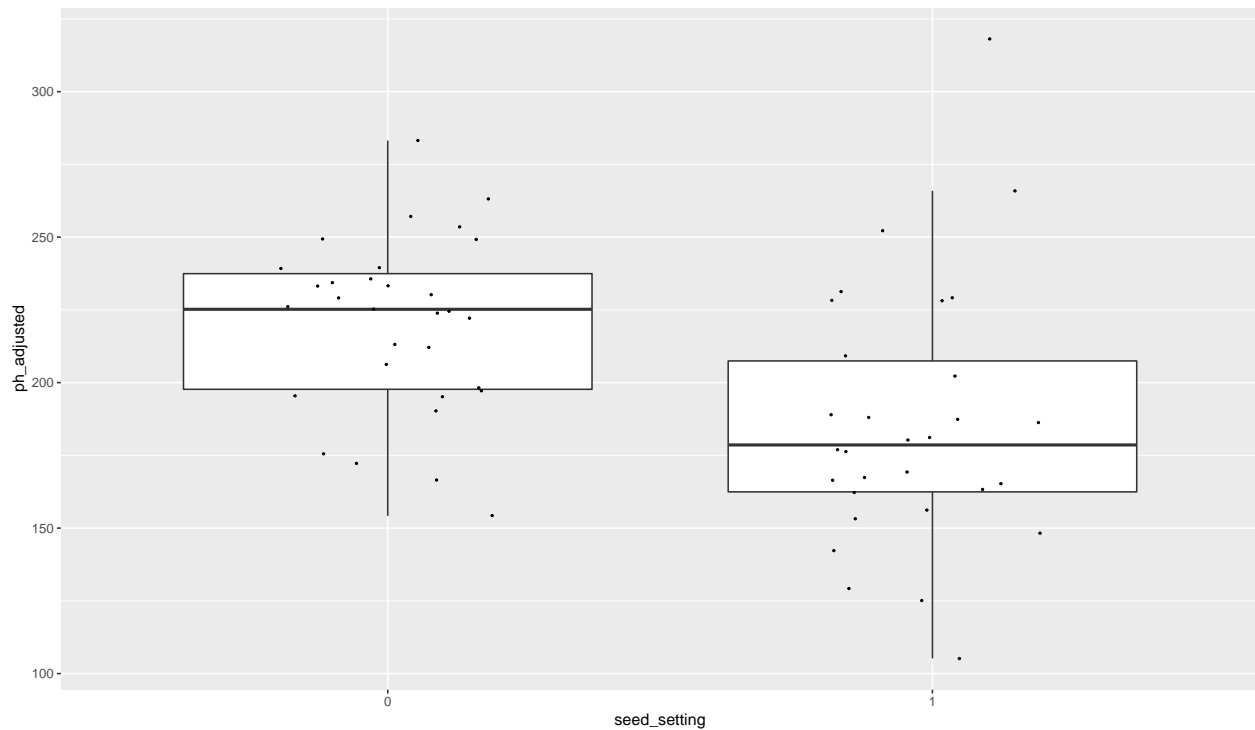

```
md_22 <-glm(ph_adjusted ~ seed_setting , data = central_american, family = gaussian)
summary(md_22)
```

```
##
## Call:
## glm(formula = ph_adjusted ~ seed_setting, family = gaussian,
##      data = central_american)
##
## Deviance Residuals:
##      Min       1Q   Median       3Q      Max
## -80.892  -23.073   1.358   18.927  132.108
##
## Coefficients:
##              Estimate Std. Error t value Pr(>|t|)
## (Intercept)    220.273     6.811   32.339 < 2e-16 ***
## seed_setting1  -34.181     9.713   -3.519 0.000841 ***
## ---
## Signif. codes:  0 '***' 0.001 '**' 0.01 '*' 0.05 '.' 0.1 ' ' 1
##
## (Dispersion parameter for gaussian family taken to be 1438.19)
##
##      Null deviance: 102666  on 60  degrees of freedom
## Residual deviance:  84853  on 59  degrees of freedom
## (6 observations deleted due to missingness)
## AIC: 620.62
##
## Number of Fisher Scoring iterations: 2
```

```
lrtest(md_22)
```

```
## Likelihood ratio test
##
```

```
## Model 1: ph_adjusted ~ seed_setting
## Model 2: ph_adjusted ~ 1
##   #Df LogLik Df  Chisq Pr(>Chisq)
## 1    3 -307.31
## 2    2 -313.12 -1 11.624  0.0006511 ***
## ---
## Signif. codes:  0 '***' 0.001 '**' 0.01 '*' 0.05 '.' 0.1 ' ' 1

lsmeans_ss_ph <- LSD.test(md_22, "seed_setting", p.adj="none" )
lsmeans_ss_ph

## $statistics
##   MSerror Df      Mean      CV
##   1438.19 59 203.4623 18.63907
##
## $parameters
##           test p.adjusted      name.t ntr alpha
##   Fisher-LSD      none seed_setting   2  0.05
##
## $means
##   ph_adjusted      std r      LCL      UCL   Min   Max   Q25   Q50   Q75
## 0    220.2726 29.88375 31 206.6433 233.9019 154.2 283.2 197.70 225.200 237.45
## 1    186.0917 44.74529 30 172.2371 199.9463 105.2 318.2 162.45 178.575 207.45
##
## $comparison
## NULL
##
## $groups
##   ph_adjusted groups
## 0    220.2726      a
## 1    186.0917      b
##
## attr(,"class")
## [1] "group"
```

### C. Growing degree days (Tbase is 10°C)

```
ggdensity(central_american$GDD10c,
           main = "Density plot of flowering time",
           xlab = "Flowering Time")
```

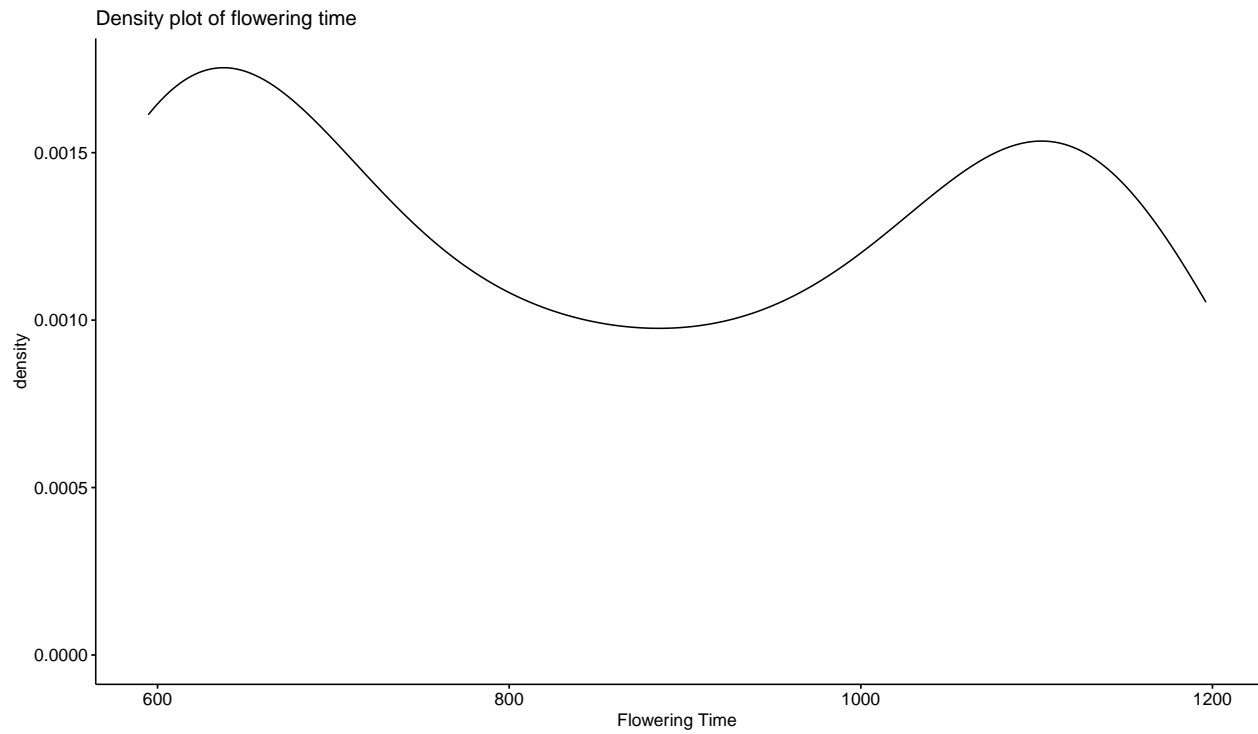

```
ggplot(data = central_american, mapping = aes(x = seed_setting, y = GDD10c)) +  
  geom_boxplot(outlier.size = -1)+geom_jitter(position=position_jitter(0.2), size=0.4)
```

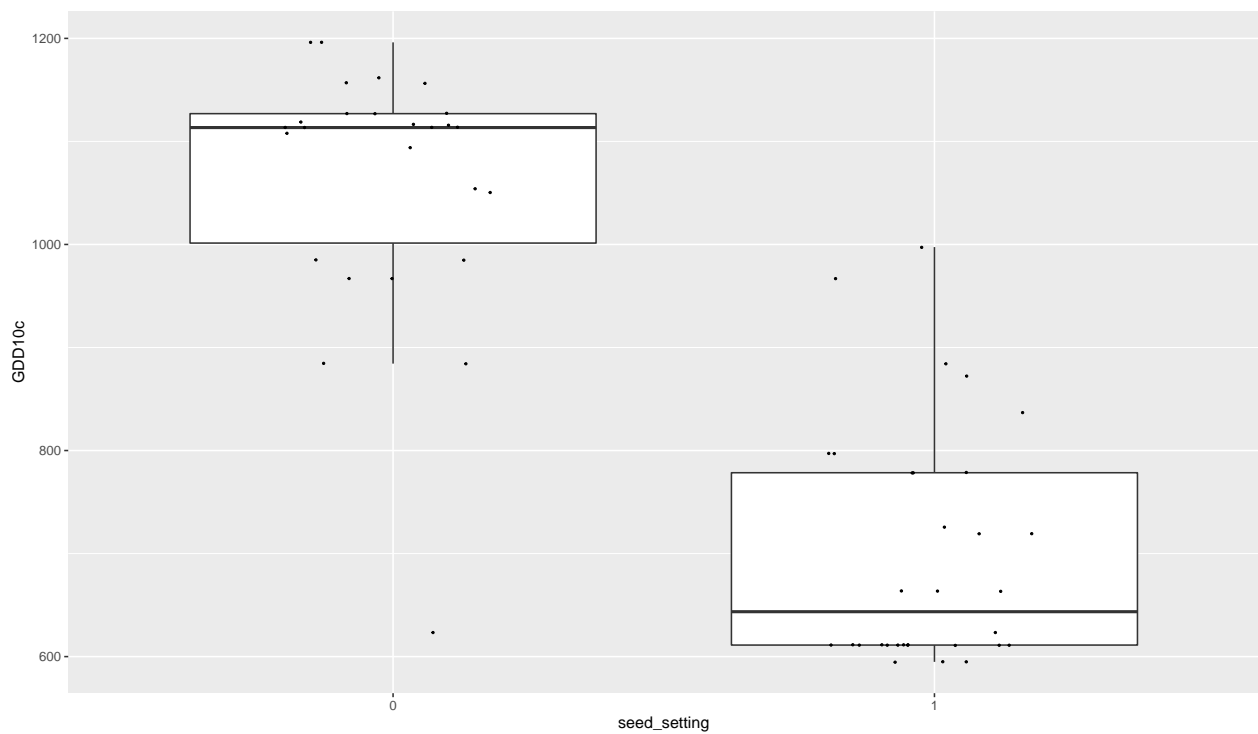

```
md_23 <-glm(GDD10c ~ seed_setting , data = central_american, family = gaussian)  
summary(md_23)
```

```
##  
## Call:
```



```
## glm(formula = GDD10c ~ seed_setting, family = gaussian, data = central_american)
##
## Deviance Residuals:
##      Min       1Q   Median       3Q      Max
## -440.14  -88.37   19.78   74.97  297.88
##
## Coefficients:
##              Estimate Std. Error t value Pr(>|t|)
## (Intercept)    1063.69      23.49   45.28  <2e-16 ***
## seed_setting1  -364.12      31.63  -11.51  <2e-16 ***
## ---
## Signif. codes:  0 '***' 0.001 '**' 0.01 '*' 0.05 '.' 0.1 ' ' 1
##
## (Dispersion parameter for gaussian family taken to be 14347.88)
##
##      Null deviance: 2705388  on 57  degrees of freedom
## Residual deviance:  803481  on 56  degrees of freedom
## (9 observations deleted due to missingness)
## AIC: 723.7
##
## Number of Fisher Scoring iterations: 2
```

```
lrtest(md_23)
```

```
## Likelihood ratio test
##
## Model 1: GDD10c ~ seed_setting
## Model 2: GDD10c ~ 1
##   #Df LogLik Df  Chisq Pr(>Chisq)
## 1    3 -358.85
## 2    2 -394.06 -1 70.415  < 2.2e-16 ***
## ---
## Signif. codes:  0 '***' 0.001 '**' 0.01 '*' 0.05 '.' 0.1 ' ' 1
```

```
lsmeans_ss_GDD10c <- LSD.test(md_23, "seed_setting", p.adj="none" )
lsmeans_ss_GDD10c
```

```
## $statistics
##      MSerror Df      Mean      CV
##  14347.88 56 862.7974 13.88305
##
## $parameters
##      test p.adjusted      name.t ntr alpha
## Fisher-LSD      none seed_setting  2  0.05
##
## $means
##      GDD10c      std r      LCL      UCL      Min      Max      Q25      Q50
## 0 1063.6923 124.0660 26 1016.6336 1110.7510 623.55 1196.15 1001.35 1113.450
## 1  699.5703 116.2133 32  657.1521  741.9885 594.90  997.45  611.20  643.575
##      Q75
## 0 1126.95
## 1  778.45
##
## $comparison
## NULL
```

```
##
## $groups
##      GDD10c groups
## 0 1063.6923      a
## 1  699.5703      b
##
## attr(,"class")
## [1] "group"
table(central_american$seed_setting)
```

```
##
##  0  1
## 34 33
table(central_american$seed_setting)
```

```
##
##  0  1
## 34 33
```

## Climatic & Geographical Variables

### A. Temperature

Distribution of the data.

```
ggdensity(central_american$temp,
  main = "Density plot of temperature",
  xlab = "Temperature yearly average")
```

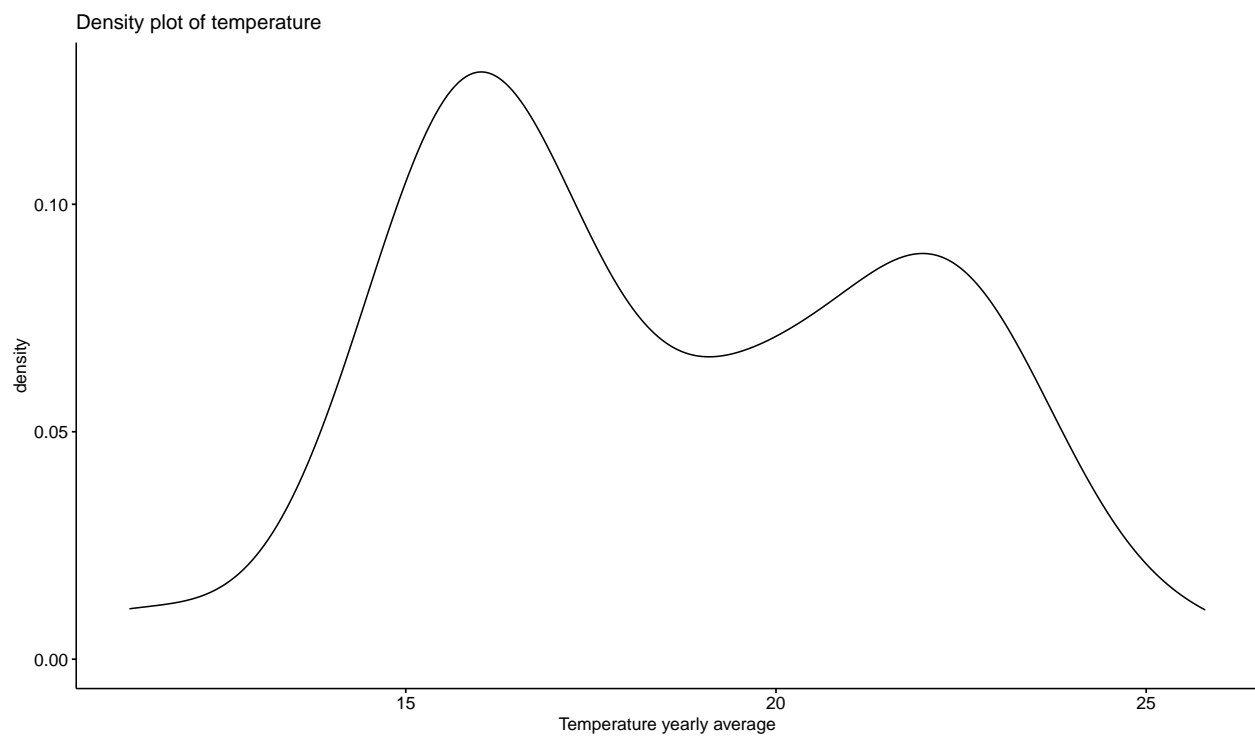

```
ggplot(data = central_american, mapping = aes(x = seed_setting, y = temp)) +
  geom_boxplot(outlier.size = -1)+geom_jitter(position=position_jitter(0.2), size=0.4)
```

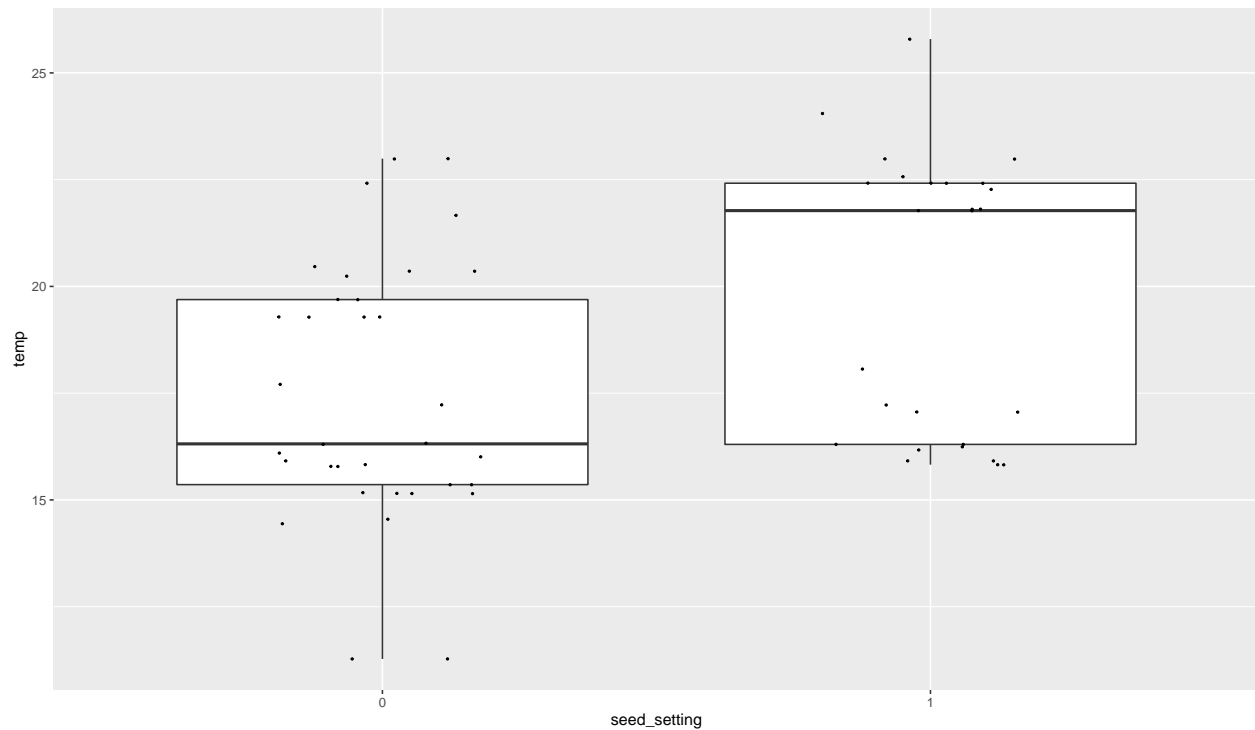

```
md_24 <-glm(temp ~ seed_setting , data = central_american, family = gaussian)
summary(md_24)
```

```
##
## Call:
## glm(formula = temp ~ seed_setting, family = gaussian, data = central_american)
##
## Deviance Residuals:
##      Min       1Q   Median       3Q      Max
## -6.1912  -2.3865  -0.6912   2.5942   5.9692
##
## Coefficients:
##              Estimate Std. Error t value Pr(>|t|)
## (Intercept)   17.4662    0.5375  32.492 < 2e-16 ***
## seed_setting1    2.3563    0.8166   2.885  0.00548 **
## ---
## Signif. codes:  0 '***' 0.001 '**' 0.01 '*' 0.05 '.' 0.1 ' ' 1
##
## (Dispersion parameter for gaussian family taken to be 9.824597)
##
##      Null deviance: 651.63  on 59  degrees of freedom
## Residual deviance: 569.83  on 58  degrees of freedom
## (7 observations deleted due to missingness)
## AIC: 311.33
##
## Number of Fisher Scoring iterations: 2
```

```

lrtest(md_24)

## Likelihood ratio test
##
## Model 1: temp ~ seed_setting
## Model 2: temp ~ 1
##   #Df LogLik Df  Chisq Pr(>Chisq)
## 1    3 -152.67
## 2    2 -156.69 -1  8.0483   0.004555 **
## ---
## Signif. codes:  0 '***' 0.001 '**' 0.01 '*' 0.05 '.' 0.1 ' ' 1

lsmeans_ss_temp <- LSD.test(md_24, "seed_setting", p.adj="none" )
lsmeans_ss_temp

## $statistics
##      MSerror Df      Mean      CV
##    9.824597 58 18.48722 16.95453
##
## $parameters
##      test p.adjusted      name.t ntr alpha
## Fisher-LSD      none seed_setting  2  0.05
##
## $means
##      temp      std  r      LCL      UCL      Min      Max      Q25      Q50
## 0 17.46618 3.024049 34 16.39016 18.54220 11.275 22.99167 15.35833 16.3125
## 1 19.82244 3.274421 26 18.59196 21.05291 15.825 25.79167 16.30000 21.7750
##      Q75
## 0 19.69167
## 1 22.41667
##
## $comparison
## NULL
##
## $groups
##      temp groups
## 1 19.82244      a
## 0 17.46618      b
##
## attr("class")
## [1] "group"

```

## B. Precipitation

```

ggdensity(central_american$prec,
  main = "Density plot of precipitation",
  xlab = "Precipitation yearly average")

```

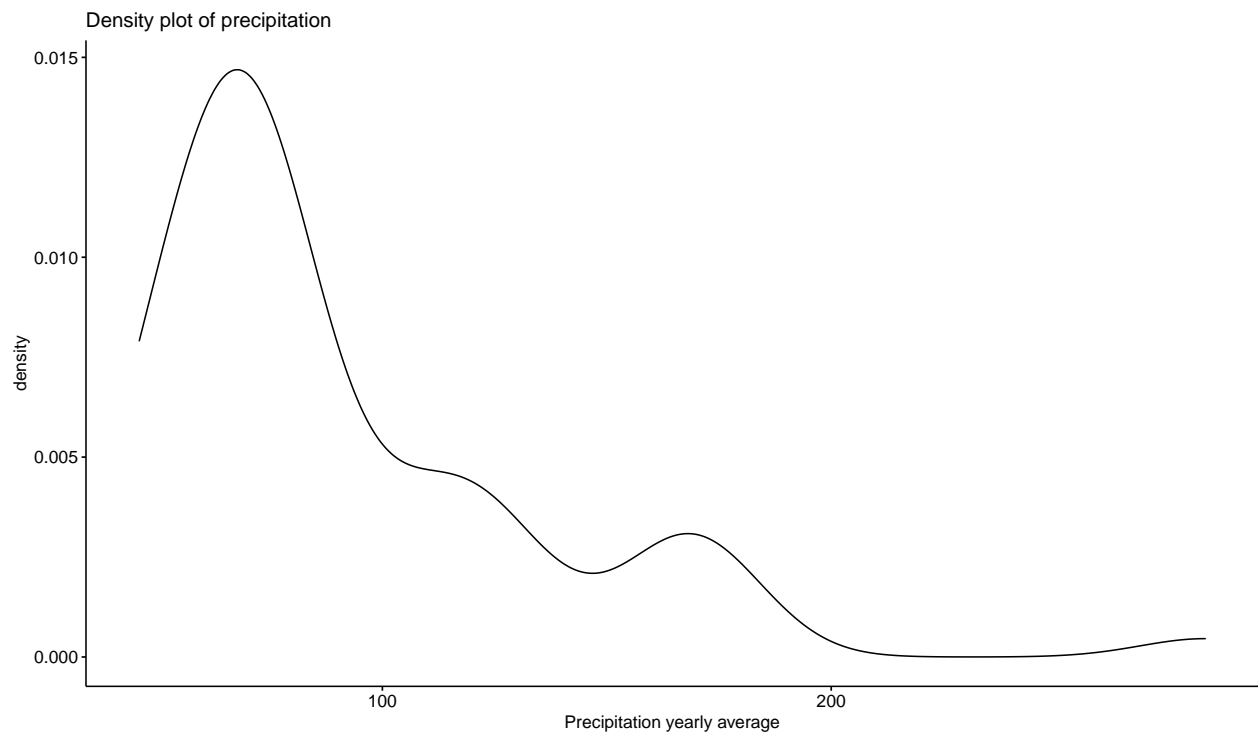

```
ggplot(data = central_american, mapping = aes(x = seed_setting, y = prec)) +
  geom_boxplot(outlier.size = -1)+geom_jitter(position=position_jitter(0.2), size=0.4)
```

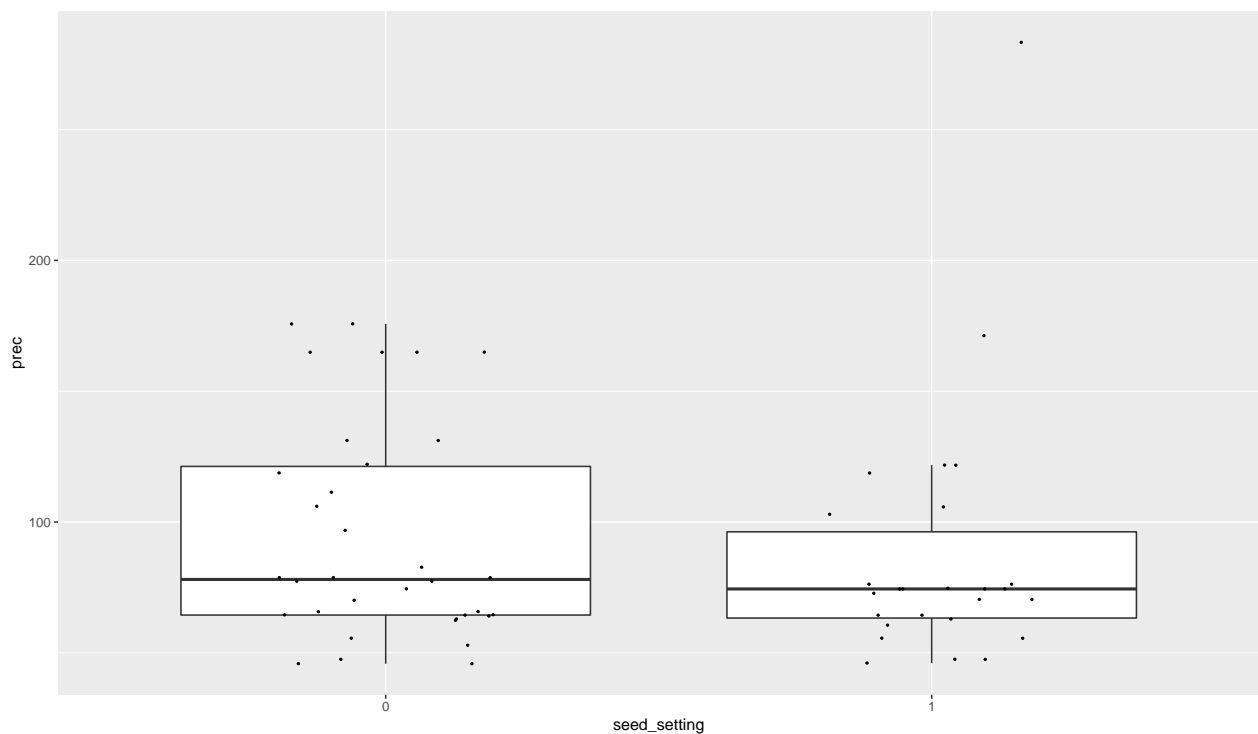

```
md_25 <-glm(prec ~ seed_setting , data = central_american, family = gaussian)
summary(md_25)
```

```
##
## Call:
```

```
## glm(formula = prec ~ seed_setting, family = gaussian, data = central_american)
##
## Deviance Residuals:
##      Min       1Q   Median       3Q      Max
## -48.54  -29.82  -15.63   19.97  196.08
##
## Coefficients:
##              Estimate Std. Error t value Pr(>|t|)
## (Intercept)    94.377      7.735  12.202  <2e-16 ***
## seed_setting1  -7.127     11.750  -0.607    0.546
## ---
## Signif. codes:  0 '***' 0.001 '**' 0.01 '*' 0.05 '.' 0.1 ' ' 1
##
## (Dispersion parameter for gaussian family taken to be 2033.995)
##
##      Null deviance: 118720  on 59  degrees of freedom
## Residual deviance: 117972  on 58  degrees of freedom
## (7 observations deleted due to missingness)
## AIC: 631.3
##
## Number of Fisher Scoring iterations: 2
```

```
lrtest(md_25)
```

```
## Likelihood ratio test
##
## Model 1: prec ~ seed_setting
## Model 2: prec ~ 1
##   #Df LogLik Df  Chisq Pr(>Chisq)
## 1    3 -312.65
## 2    2 -312.84 -1  0.3795    0.5379
```

```
lsmeans_ss_prec <- LSD.test(md_25, "seed_setting", p.adj="none" )
lsmeans_ss_prec
```

```
## $statistics
##      MSerror Df      Mean      CV
## 2033.995 58 91.28889 49.40342
##
## $parameters
##      test p.adjusted      name.t ntr alpha
## Fisher-LSD      none seed_setting  2  0.05
##
## $means
##      prec      std r      LCL      UCL      Min      Max      Q25      Q50
## 0 94.37745 41.72935 34 78.89505 109.8599 45.83333 175.7500 64.43750 78.04167
## 1 87.25000 49.19656 26 69.54520 104.9548 46.08333 283.3333 63.29167 74.41667
##      Q75
## 0 121.25
## 1  96.25
##
## $comparison
## NULL
##
## $groups
```

```
##      prec groups
## 0 94.37745      a
## 1 87.25000      a
##
## attr(,"class")
## [1] "group"
```

### C. Solar Radiation

```
ggdensity(central_american$sr,
  main = "Density plot of SR",
  xlab = "Solar Radiation yearly average")
```

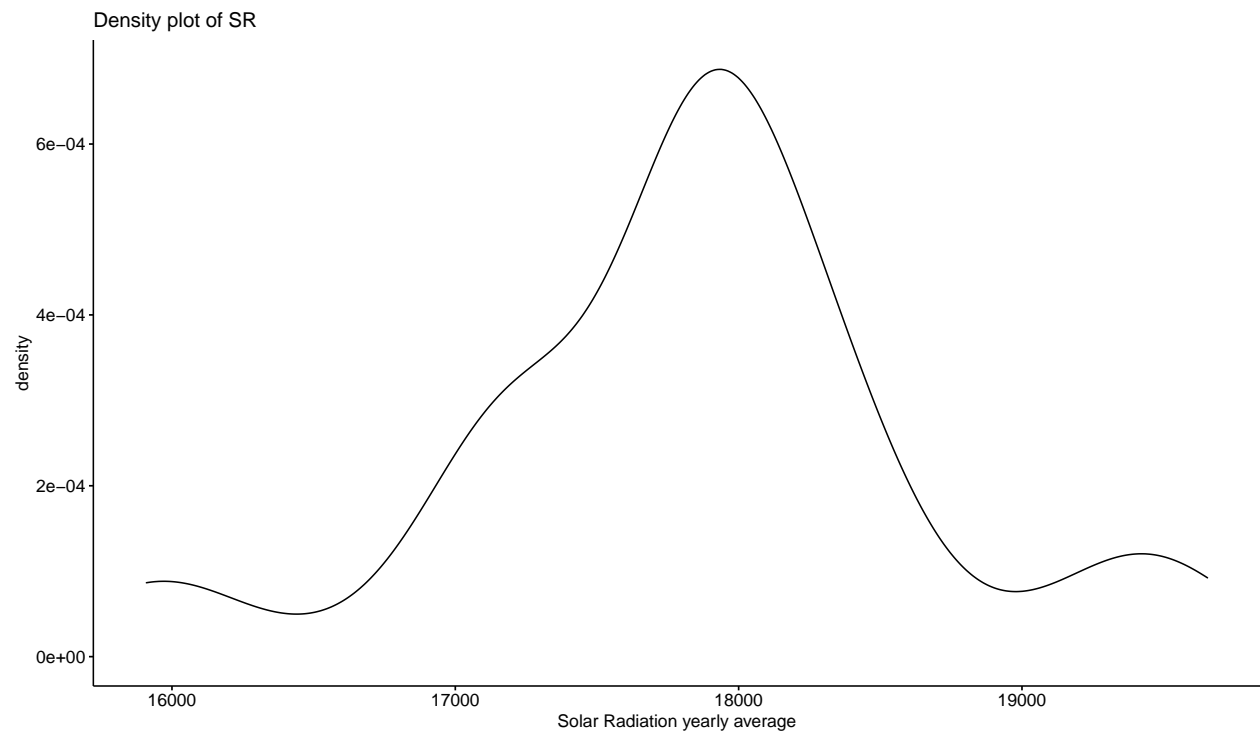

```
ggplot(data = central_american, mapping = aes(x = seed_setting, y = sr)) +
  geom_boxplot(outlier.size = -1)+geom_jitter(position=position_jitter(0.2), size=0.4)
```

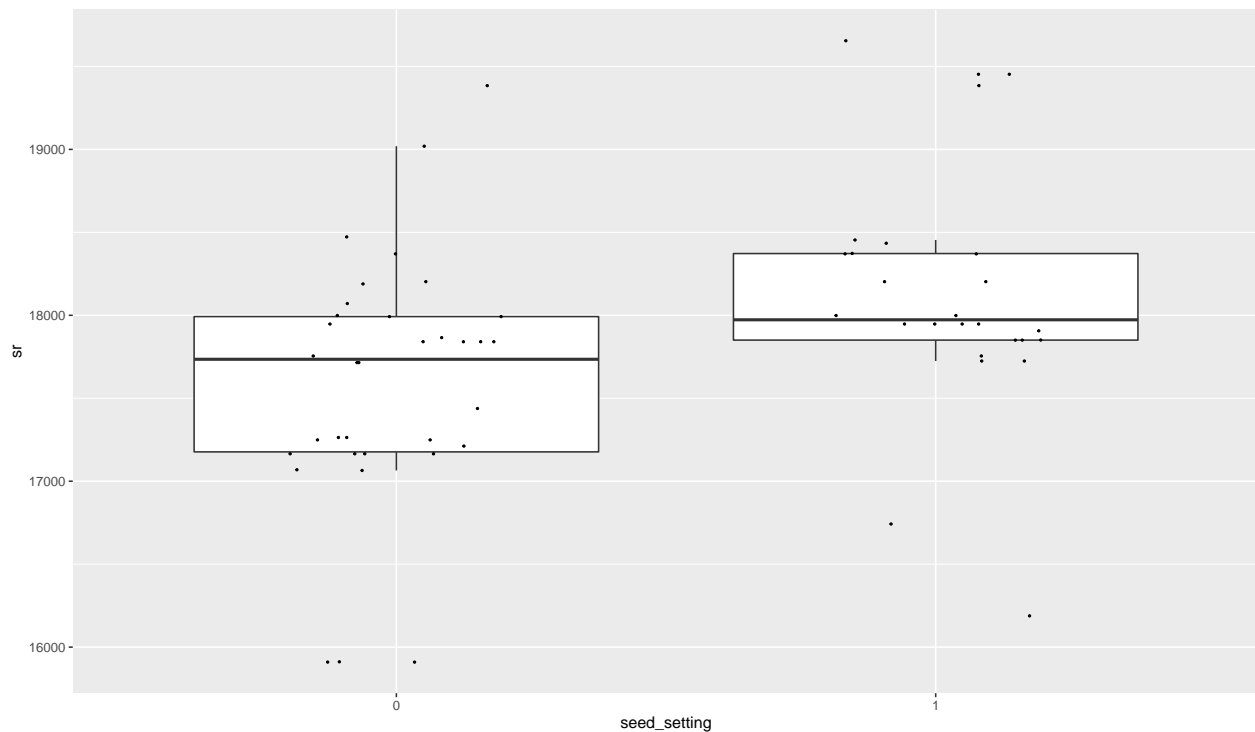

```
md_26 <-glm(sr ~ seed_setting , data = central_american, family = gaussian)
summary(md_26)
```

```
##
## Call:
## glm(formula = sr ~ seed_setting, family = gaussian, data = central_american)
##
## Deviance Residuals:
##      Min       1Q   Median       3Q      Max
## -1955.17  -356.06   -42.83    320.80   1788.62
##
## Coefficients:
##              Estimate Std. Error t value Pr(>|t|)
## (Intercept)   17595.7     130.1  135.290 < 2e-16 ***
## seed_setting1    547.8     197.6   2.773  0.00747 **
## ---
## Signif. codes:  0 '***' 0.001 '**' 0.01 '*' 0.05 '.' 0.1 ' ' 1
##
## (Dispersion parameter for gaussian family taken to be 575127.1)
##
##      Null deviance: 37778486  on 59  degrees of freedom
## Residual deviance: 33357370  on 58  degrees of freedom
## (7 observations deleted due to missingness)
## AIC: 969.98
##
## Number of Fisher Scoring iterations: 2
```

```
lrtest(md_26)
```

```
## Likelihood ratio test
##
## Model 1: sr ~ seed_setting
```



```
## Model 2: sr ~ 1
##   #Df LogLik Df  Chisq Pr(>Chisq)
## 1    3 -481.99
## 2    2 -485.72 -1  7.4677   0.006282 **
## ---
## Signif. codes:  0 '***' 0.001 '**' 0.01 '*' 0.05 '.' 0.1 ' ' 1

lsmeans_ss_sr <- LSD.test(md_26, "seed_setting", p.adj="none" )
lsmeans_ss_sr

## $statistics
##      MSerror Df      Mean      CV
## 575127.1 58 17833.08 4.252609
##
## $parameters
##      test p.adjusted      name.t ntr alpha
## Fisher-LSD      none seed_setting  2  0.05
##
## $means
##      sr      std  r      LCL      UCL      Min      Max      Q25      Q50
## 0 17595.71 758.0575 34 17335.37 17856.05 15909.75 19384.33 17176.83 17734.92
## 1 18143.50 758.7854 26 17845.79 18441.21 16188.33 19654.75 17850.50 17973.00
##      Q75
## 0 17992.25
## 1 18372.19
##
## $comparison
## NULL
##
## $groups
##      sr groups
## 1 18143.50    a
## 0 17595.71    b
##
## attr(,"class")
## [1] "group"
```

#### D. Elevation

```
ggdensity(central_american$elevation,
           main = "Density plot of elevation",
           xlab = "Elavations of the genotypes country of origin")
```

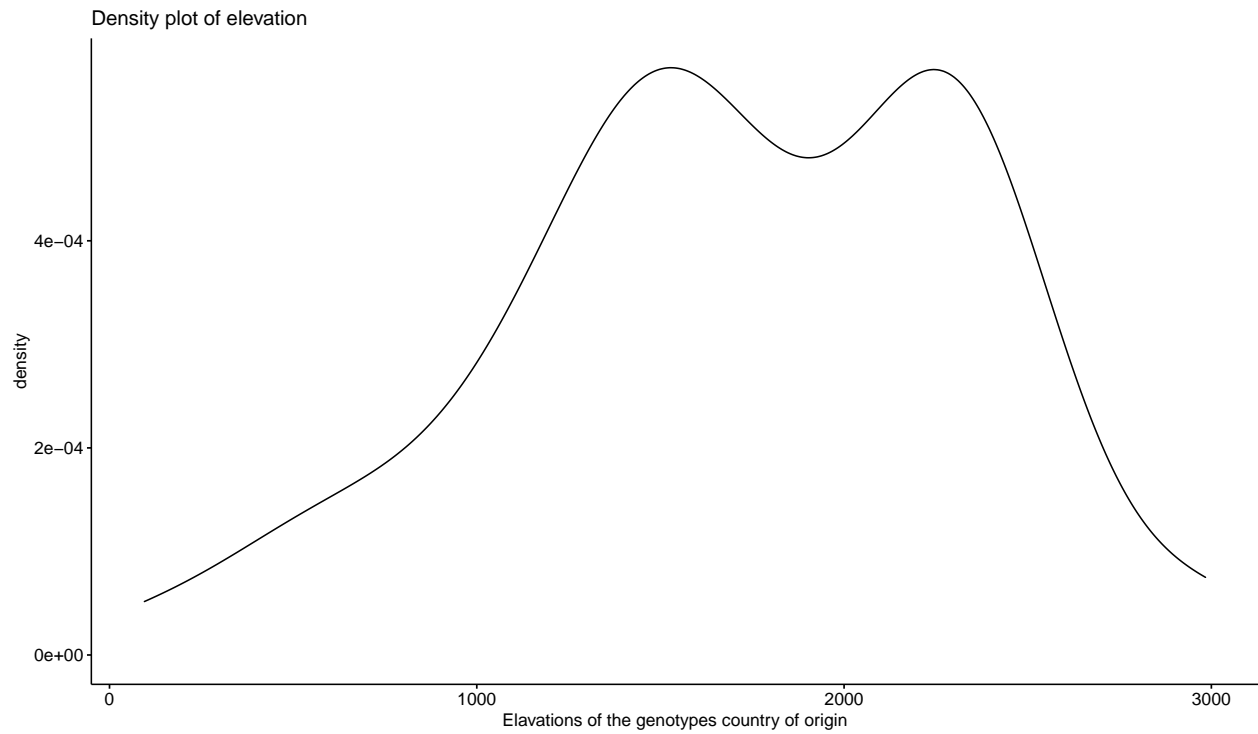

```
ggplot(data = central_american, mapping = aes(x = seed_setting, y = elevation)) +  
  geom_boxplot(outlier.size = -1)+geom_jitter(position=position_jitter(0.2), size=0.4)
```

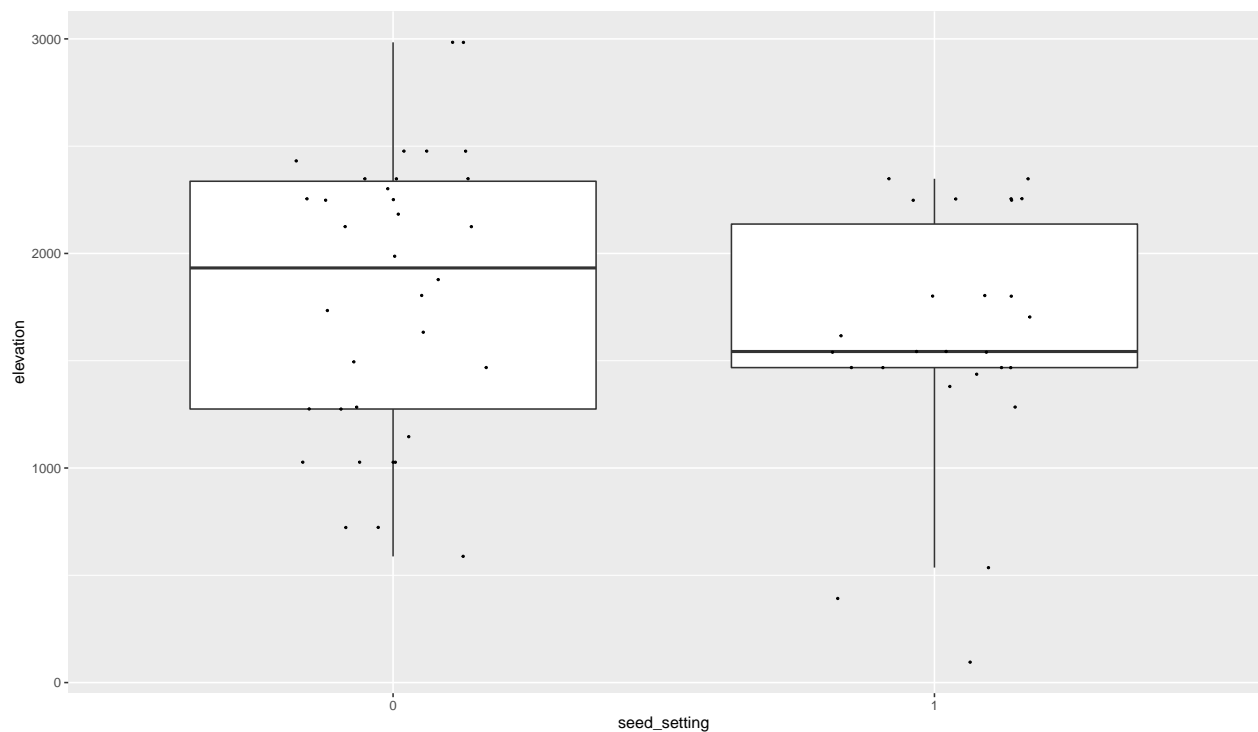

```
md_27 <-glm(elevation ~ seed_setting , data = central_american, family = gaussian)  
summary(md_27)
```

```
##  
## Call:
```

```
## glm(formula = elevation ~ seed_setting, family = gaussian, data = central_american)
##
## Deviance Residuals:
##      Min       1Q   Median       3Q      Max
## -1514.38   -329.13     1.13    539.65   1175.65
##
## Coefficients:
##              Estimate Std. Error t value Pr(>|t|)
## (Intercept)    1808.4      107.7   16.786 <2e-16 ***
## seed_setting1   -199.0      163.7   -1.216   0.229
## ---
## Signif. codes:  0 '***' 0.001 '**' 0.01 '*' 0.05 '.' 0.1 ' ' 1
##
## (Dispersion parameter for gaussian family taken to be 394613.1)
##
##      Null deviance: 23470831  on 59  degrees of freedom
## Residual deviance: 22887562  on 58  degrees of freedom
## (7 observations deleted due to missingness)
## AIC: 947.38
##
## Number of Fisher Scoring iterations: 2
```

```
lrtest(md_27)
```

```
## Likelihood ratio test
##
## Model 1: elevation ~ seed_setting
## Model 2: elevation ~ 1
##   #Df LogLik Df  Chisq Pr(>Chisq)
## 1    3 -470.69
## 2    2 -471.44 -1 1.5099      0.2192
```

```
lsmeans_ss_elevation <- LSD.test(md_27, "seed_setting", p.adj="none" )
lsmeans_ss_elevation
```

```
## $statistics
##      MSerror Df      Mean      CV
##   394613.1 58 1722.133 36.47699
##
## $parameters
##      test p.adjusted      name.t ntr alpha
## Fisher-LSD      none seed_setting  2  0.05
##
## $means
##   elevation      std r      LCL      UCL Min Max  Q25  Q50  Q75
## 0  1808.353 660.5135 34 1592.703 2024.003 588 2984 1275 1932.5 2336.5
## 1  1609.385 582.7653 26 1362.780 1855.990  95 2348 1468 1543.0 2137.0
##
## $comparison
## NULL
##
## $groups
##   elevation groups
## 0  1808.353      a
## 1  1609.385      a
```

```
##
## attr("class")
## [1] "group"
```

## E. Latitude

```
ggsdensity(central_american$latitude,
  main = "Density plot of latitude",
  xlab = "Latitudess of the genotypes country of origin")
```

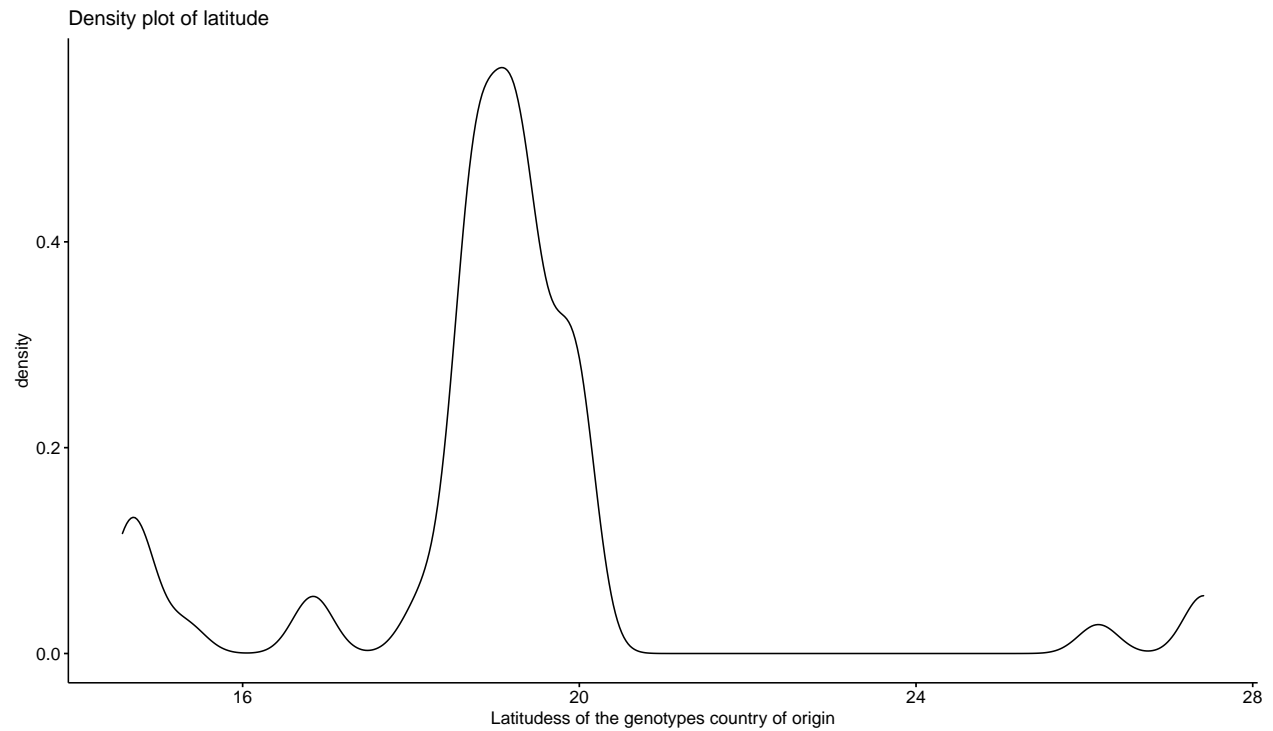

```
ggplot(data = central_american, mapping = aes(x = seed_setting, y = latitude)) +
  geom_boxplot(outlier.size = -1)+geom_jitter(position=position_jitter(0.2), size=0.4)
```

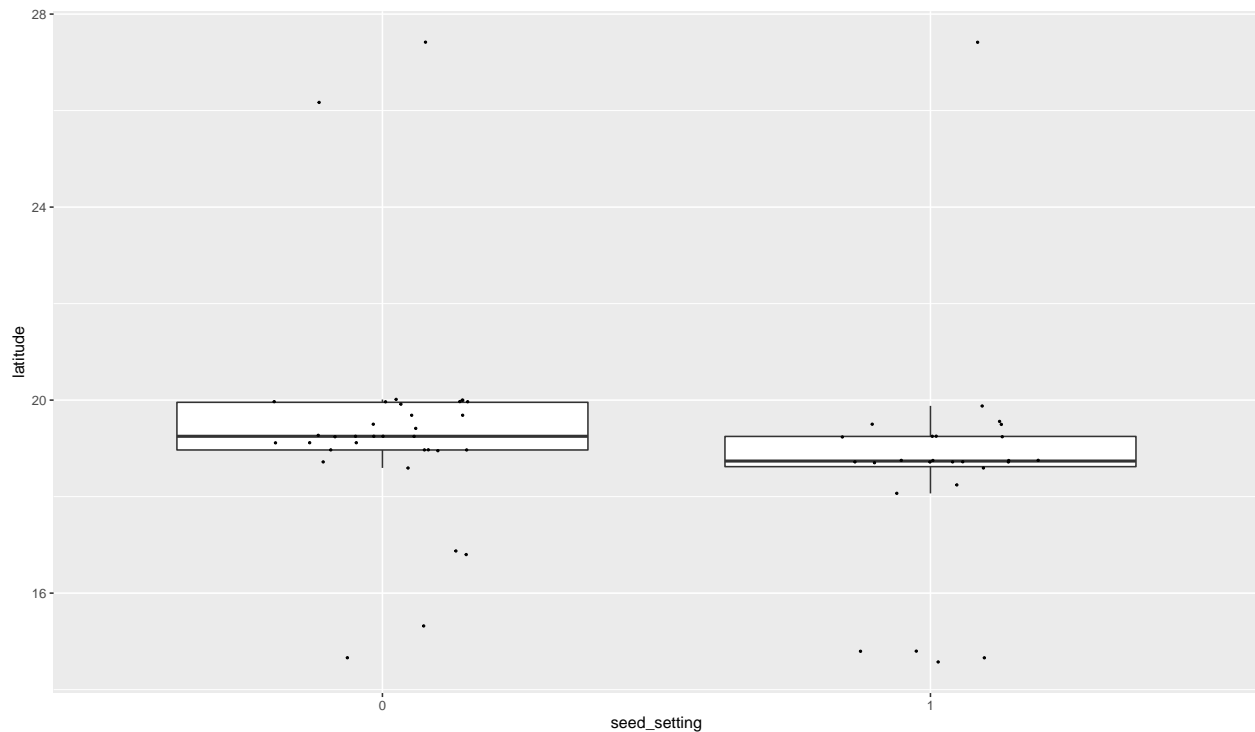

```
md_28 <-glm(latitude ~ seed_setting , data = central_american, family = gaussian)
summary(md_28)
```

```
##
## Call:
## glm(formula = latitude ~ seed_setting, family = gaussian, data = central_american)
##
## Deviance Residuals:
##      Min       1Q   Median       3Q      Max
## -4.7613  -0.4541   0.0987   0.5459   8.8070
##
## Coefficients:
##              Estimate Std. Error t value Pr(>|t|)
## (Intercept)    19.4208     0.3980  48.795  <2e-16 ***
## seed_setting1  -0.8111     0.6046  -1.342   0.185
## ---
## Signif. codes:  0 '***' 0.001 '**' 0.01 '*' 0.05 '.' 0.1 ' ' 1
##
## (Dispersion parameter for gaussian family taken to be 5.385976)
##
##      Null deviance: 322.08  on 59  degrees of freedom
## Residual deviance: 312.39  on 58  degrees of freedom
## (7 observations deleted due to missingness)
## AIC: 275.27
##
## Number of Fisher Scoring iterations: 2
```

```
lrtest(md_28)
```

```
## Likelihood ratio test
##
## Model 1: latitude ~ seed_setting
```

```
## Model 2: latitude ~ 1
##   #Df LogLik Df   Chisq Pr(>Chisq)
## 1    3 -134.63
## 2    2 -135.55 -1 1.8335      0.1757

lsmeans_ss_latitude <- LSD.test(md_28, "seed_setting", p.adj="none" )
lsmeans_ss_latitude

## $statistics
##   MSerror Df      Mean      CV
## 5.385976 58 19.06931 12.17018
##
## $parameters
##      test p.adjusted      name.t ntr alpha
## Fisher-LSD      none seed_setting  2 0.05
##
## $means
##   latitude      std r      LCL      UCL      Min      Max      Q25      Q50
## 0 19.42080 2.253246 34 18.62410 20.21750 14.65946 27.41667 18.96667 19.25000
## 1 18.60967 2.407004 26 17.69861 19.52074 14.57172 27.41667 18.62092 18.73712
##      Q75
## 0 19.95417
## 1 19.24726
##
## $comparison
## NULL
##
## $groups
##   latitude groups
## 0 19.42080      a
## 1 18.60967      a
##
## attr(,"class")
## [1] "group"
```

## F. Longitude

```
ggdensity(central_american$longitude,
           main = "Density plot of longitude",
           xlab = "Longitudes of the genotypes country of origin")
```

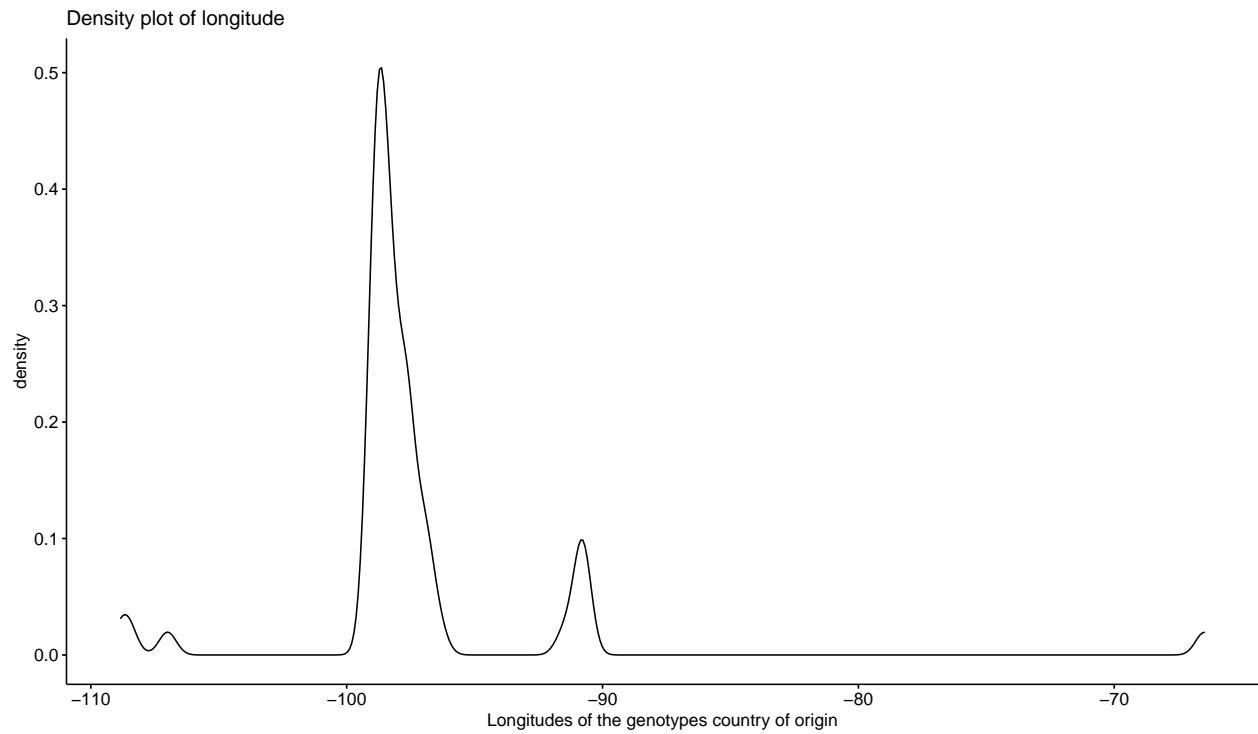

```
ggplot(data = central_american, mapping = aes(x = seed_setting, y = longitude)) +  
  geom_boxplot(outlier.size = -1)+geom_jitter(position=position_jitter(0.2), size=0.4)
```

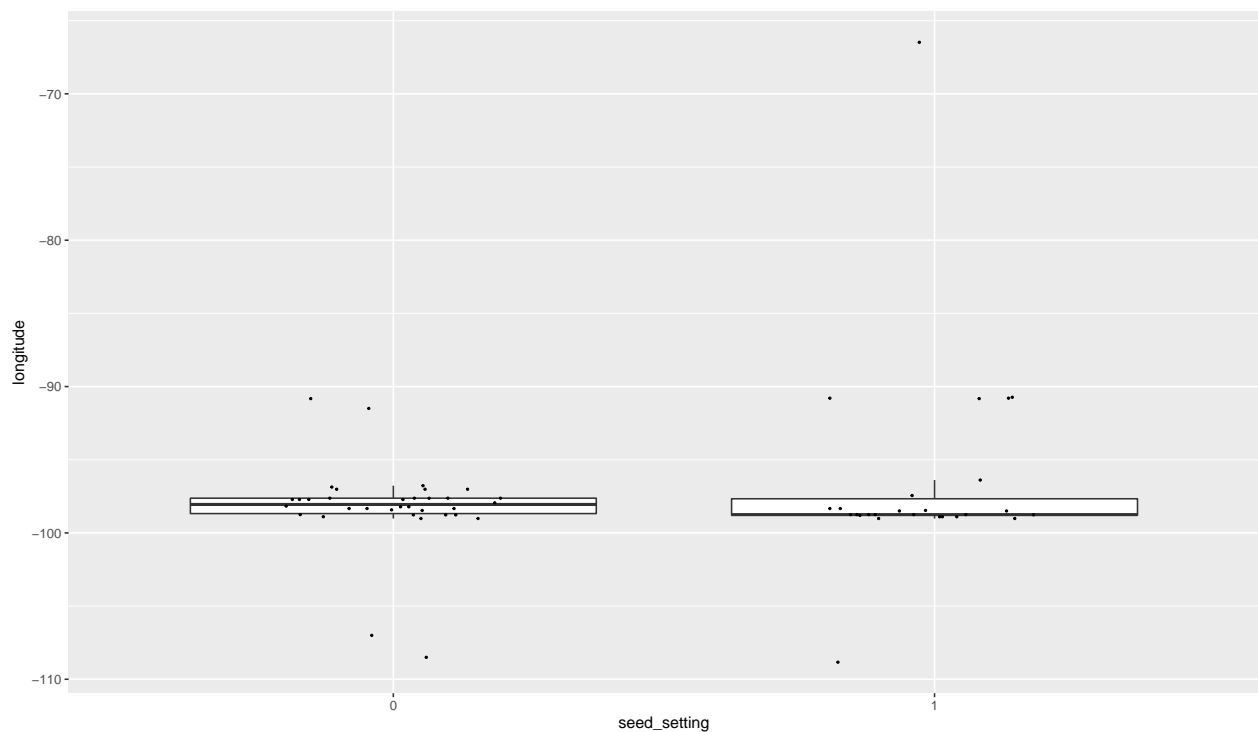

```
md_29 <-glm(longitude ~ seed_setting , data = central_american, family = gaussian)  
summary(md_29)
```

```
##  
## Call:
```

```
## glm(formula = longitude ~ seed_setting, family = gaussian, data = central_american)
##
## Deviance Residuals:
##      Min       1Q   Median       3Q      Max
## -12.3254  -2.2421  -0.2700   0.5467  30.0290
##
## Coefficients:
##              Estimate Std. Error t value Pr(>|t|)
## (Intercept)  -98.1745     0.8925 -109.996 <2e-16 ***
## seed_setting1   1.6666     1.3558   1.229   0.224
## ---
## Signif. codes:  0 '***' 0.001 '**' 0.01 '*' 0.05 '.' 0.1 ' ' 1
##
## (Dispersion parameter for gaussian family taken to be 27.08458)
##
##      Null deviance: 1611.8  on 59  degrees of freedom
## Residual deviance: 1570.9  on 58  degrees of freedom
## (7 observations deleted due to missingness)
## AIC: 372.18
##
## Number of Fisher Scoring iterations: 2
```

```
lrtest(md_29)
```

```
## Likelihood ratio test
##
## Model 1: longitude ~ seed_setting
## Model 2: longitude ~ 1
##   #Df LogLik Df  Chisq Pr(>Chisq)
## 1    3 -183.09
## 2    2 -183.86 -1 1.5431    0.2142
```

```
lsmeans_ss_longitude <- LSD.test(md_29, "seed_setting", p.adj="none" )
lsmeans_ss_longitude
```

```
## $statistics
##      MSerror Df      Mean      CV
## 27.08458 58 -97.45231 -5.34034
##
## $parameters
##      test p.adjusted      name.t ntr alpha
## Fisher-LSD      none seed_setting 2 0.05
##
## $means
## longitude      std r      LCL      UCL      Min      Max      Q25
## 0 -98.17452 2.998726 34 -99.96110 -96.38793 -108.5000 -90.82485 -98.67867
## 1 -96.50789 7.139070 26 -98.55093 -94.46484 -108.8333 -66.47890 -98.78987
##      Q50      Q75
## 0 -98.05569 -97.62778
## 1 -98.75000 -97.66687
##
## $comparison
## NULL
##
## $groups
```



```
## longitude groups
## 1 -96.50789      a
## 0 -98.17452      a
##
## attr(,"class")
## [1] "group"
```

## 5. Focus on Central American *A. hypochondriacus* Accessions

Central America originated *A. hypochondriacus* accessions are the most diverse in flowering time and seed setting. Therefore, I would like to focus on that.

```
central_american_hypo <- filter(data, (country %in% c("GTM", "MEX", "PTR")))%>%
  filter(species=="hypo")

central_american_hypo$seed_setting <- as.factor(central_american_hypo$seed_setting)

central_american_hypo_plot <- ggplot(central_american_hypo, aes(x=ft_adjusted, fill=factor(seed_setting))) +
  geom_histogram(color="black", binwidth = 7) +
  scale_x_continuous(breaks = scales::pretty_breaks(n = 10) ) +
  #scale_y_continuous(expand = expand_scale(mult = 0, add = 0.1)) +
  labs( y="Count", x="Flowering Time [days]") +

  theme(axis.text.x = element_text(colour = "grey20", size = 4.5 , hjust = 0.5, vjust = 0.5),
        axis.text.y = element_text(colour = "grey20", size = 4.5),
        text = element_text(size = 5), legend.position=c(0.9, 0.9),
        panel.spacing = unit(1.0, "lines"),
        legend.title = element_text(size=5, face="bold"),
        legend.key.size = unit(4, "mm"),
        legend.text=element_text(size=5)) +
  #scale_fill_discrete(name = "Species", labels=c("cru", "hypo")) +
  scale_color_discrete(name = "seed_setting", labels=c("0", "1")) +
  theme_classic()

central_american_hypo_plot

## Warning: Removed 2 rows containing non-finite values (stat_bin).
```

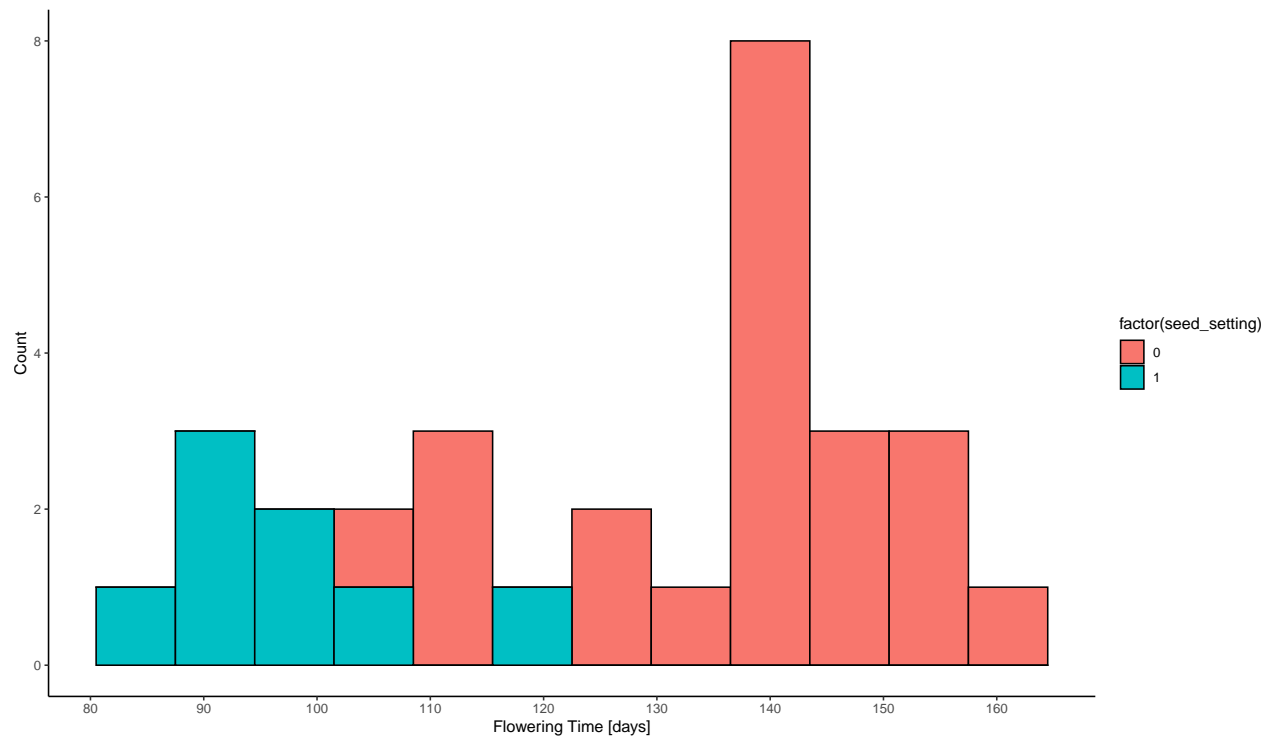

## Phenotypic traits

### A. Flowering time

```
ggdensity(central_american_hypo$ft_adjusted,  
  main = "Density plot of flowering time",  
  xlab = "flowering time")
```

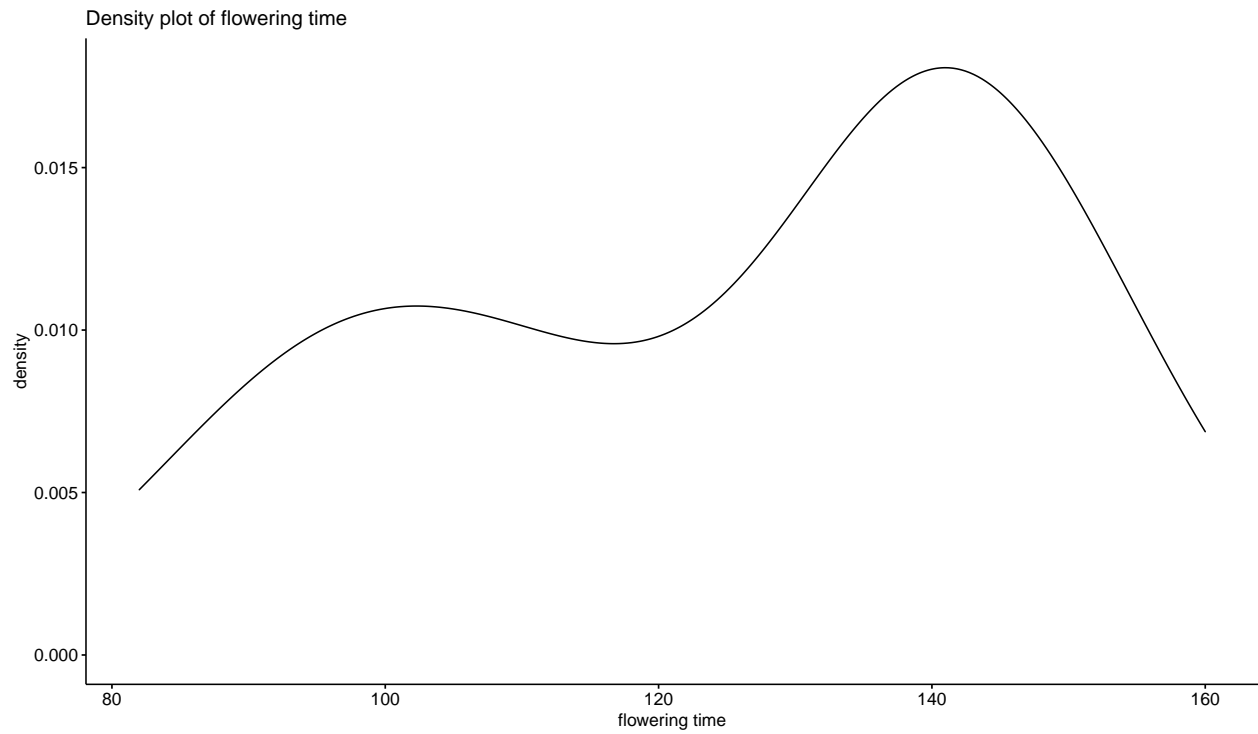

```
ggplot(data = central_american_hypo, mapping = aes(x = seed_setting, y = ft_adjusted)) +
  geom_boxplot(outlier.size = -1)+geom_jitter(position=position_jitter(0.2), size=0.4)
```

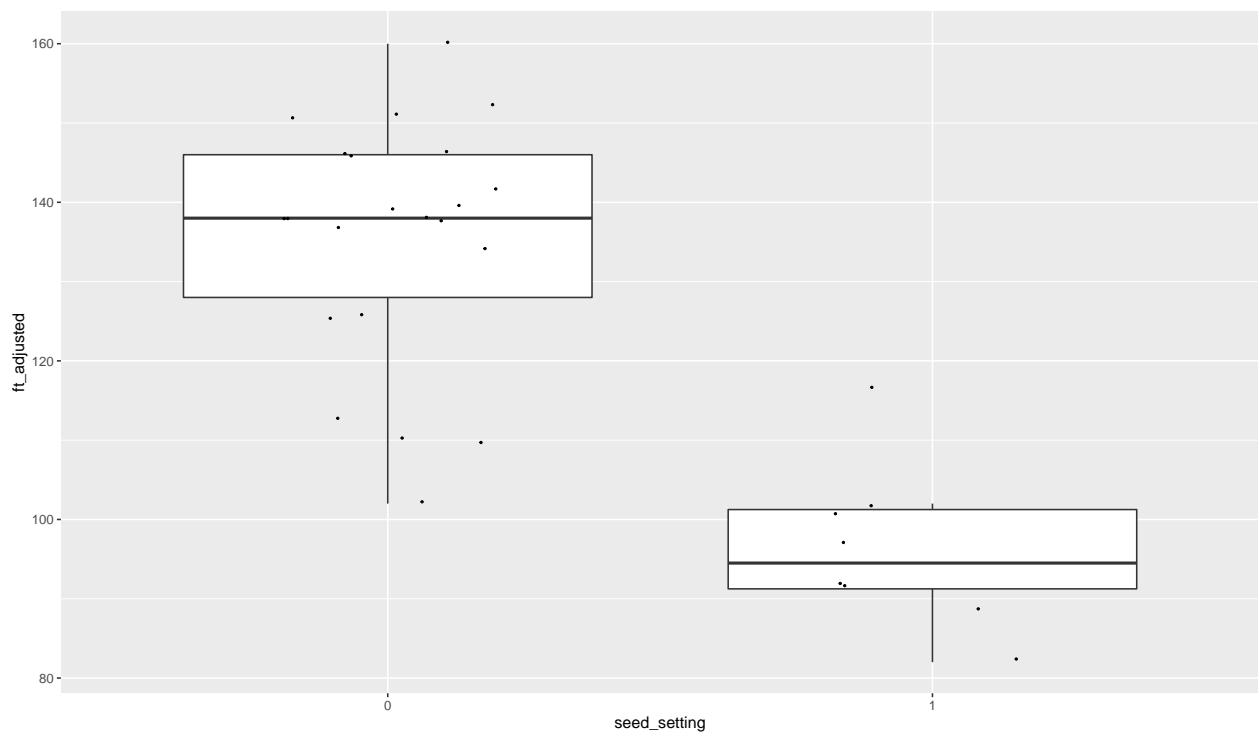

```
md_30 <-glm(ft_adjusted ~ seed_setting , data = central_american_hypo, family = gaussian)
summary(md_30)
```

```
##
## Call:
```

```
## glm(formula = ft_adjusted ~ seed_setting, family = gaussian,
##      data = central_american_hypo)
##
## Deviance Residuals:
##      Min       1Q   Median       3Q      Max
## -33.545   -6.750    2.455    9.455   24.455
##
## Coefficients:
##              Estimate Std. Error t value Pr(>|t|)
## (Intercept)    135.545      3.041  44.577 < 2e-16 ***
## seed_setting1  -39.045      5.888  -6.631 3.41e-07 ***
## ---
## Signif. codes:  0 '***' 0.001 '**' 0.01 '*' 0.05 '.' 0.1 ' ' 1
##
## (Dispersion parameter for gaussian family taken to be 203.4091)
##
##      Null deviance: 14639.5  on 29  degrees of freedom
## Residual deviance:  5695.5  on 28  degrees of freedom
## (2 observations deleted due to missingness)
## AIC: 248.52
##
## Number of Fisher Scoring iterations: 2
```

```
lrtest(md_30)
```

```
## Likelihood ratio test
##
## Model 1: ft_adjusted ~ seed_setting
## Model 2: ft_adjusted ~ 1
##   #Df LogLik Df  Chisq Pr(>Chisq)
## 1    3 -121.26
## 2    2 -135.42 -1 28.322  1.027e-07 ***
## ---
## Signif. codes:  0 '***' 0.001 '**' 0.01 '*' 0.05 '.' 0.1 ' ' 1
```

```
lsmeans_ss_ft <- LSD.test(md_30, "seed_setting", p.adj="none" )
lsmeans_ss_ft
```

```
## $statistics
##      MSError Df      Mean      CV
##    203.4091 28 125.1333 11.39757
##
## $parameters
##      test p.adjusted      name.t ntr alpha
## Fisher-LSD      none seed_setting  2 0.05
##
## $means
##   ft_adjusted      std r      LCL      UCL Min Max      Q25      Q50      Q75
## 0    135.5455 15.30243 22 129.31686 141.774 102 160 128.00 138.0 146.00
## 1     96.5000 10.54243  8  86.17104 106.829  82 117  91.25  94.5 101.25
##
## $comparison
## NULL
##
## $groups
```

```
##   ft_adjusted groups
## 0    135.5455    a
## 1    96.5000    b
##
## attr(,"class")
## [1] "group"
```

## B. Plant height

```
ggdensity(central_american_hypo$ph_adjusted,
  main = "Density plot of plant height",
  xlab = "Plant height")
```

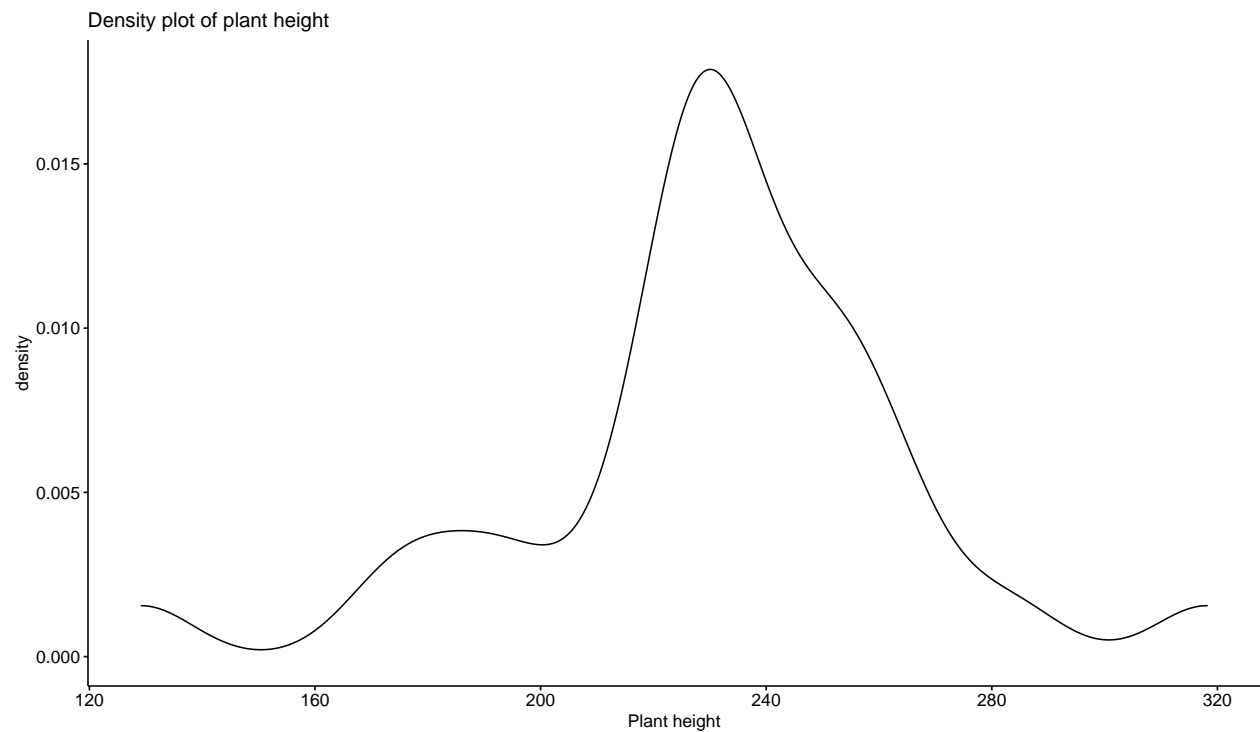

```
ggplot(data = central_american_hypo, mapping = aes(x = seed_setting, y = ph_adjusted)) +
  geom_boxplot(outlier.size = -1)+geom_jitter(position=position_jitter(0.2), size=0.4)
```

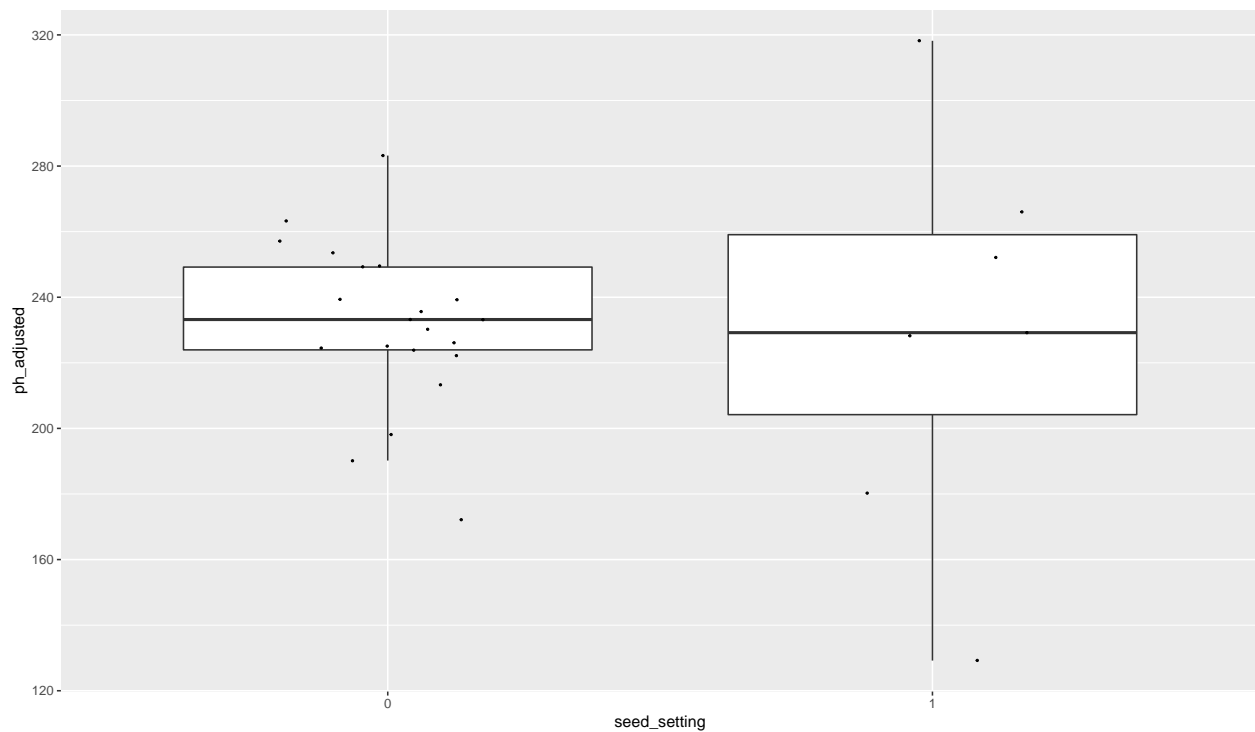

```
md_31 <-glm(ph_adjusted ~ seed_setting , data = central_american_hypo, family = gaussian)
summary(md_31)
```

```
##
## Call:
## glm(formula = ph_adjusted ~ seed_setting, family = gaussian,
##      data = central_american_hypo)
##
## Deviance Residuals:
##      Min       1Q   Median       3Q      Max
## -99.821   -8.033    0.917   18.905   89.179
##
## Coefficients:
##              Estimate Std. Error t value Pr(>|t|)
## (Intercept)    231.545     7.976   29.031  <2e-16 ***
## seed_setting1    -2.524    15.951   -0.158    0.876
## ---
## Signif. codes:  0 '***' 0.001 '**' 0.01 '*' 0.05 '.' 0.1 ' ' 1
##
## (Dispersion parameter for gaussian family taken to be 1335.861)
##
##      Null deviance: 34766  on 27  degrees of freedom
## Residual deviance: 34732  on 26  degrees of freedom
## (4 observations deleted due to missingness)
## AIC: 284.91
##
## Number of Fisher Scoring iterations: 2
```

```
lrtest(md_31)
```

```
## Likelihood ratio test
##
```

```
## Model 1: ph_adjusted ~ seed_setting
## Model 2: ph_adjusted ~ 1
##   #Df LogLik Df  Chisq Pr(>Chisq)
## 1    3 -139.46
## 2    2 -139.47 -1 0.0269      0.8696

lsmeans_ss_ph <- LSD.test(md_31, "seed_setting", p.adj="none" )
lsmeans_ss_ph

## $statistics
##      MSerror Df      Mean      CV
## 1335.861 26 230.9143 15.82814
##
## $parameters
##      test p.adjusted      name.t ntr alpha
## Fisher-LSD      none seed_setting  2 0.05
##
## $means
##   ph_adjusted      std r      LCL      UCL  Min  Max   Q25   Q50   Q75
## 0    231.5452 25.03004 21 215.1509 247.9396 172.2 283.2 223.95 233.2 249.200
## 1    229.0214 60.83083  7 200.6255 257.4173 129.2 318.2 204.20 229.2 259.075
##
## $comparison
## NULL
##
## $groups
##   ph_adjusted groups
## 0    231.5452      a
## 1    229.0214      a
##
## attr(,"class")
## [1] "group"
```

### C. Growing degree days (Tbase is 10°C)

```
ggdensity(central_american_hypo$GDD10c,
  main = "Density plot of flowering time",
  xlab = "Flowering Time")
```

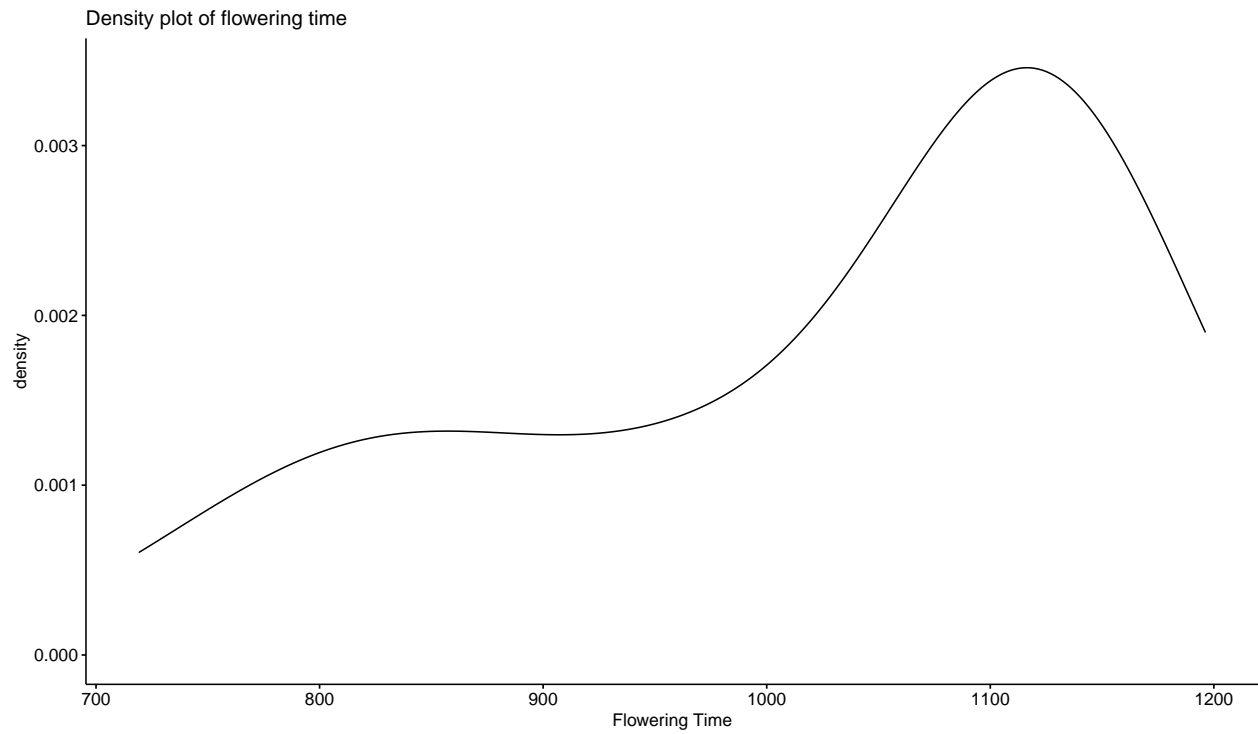

```
ggplot(data = central_american_hypo, mapping = aes(x = seed_setting, y = GDD10c)) +  
  geom_boxplot(outlier.size = -1)+geom_jitter(position=position_jitter(0.2), size=0.4)
```

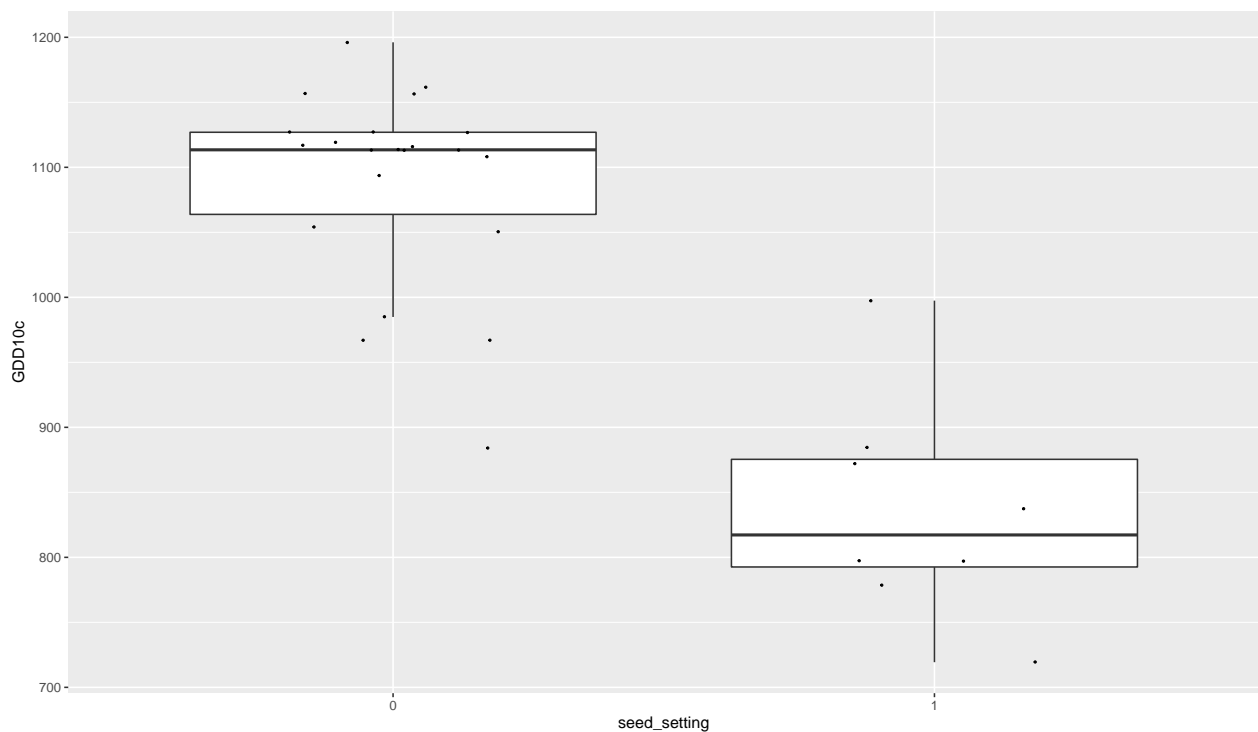

```
md_32 <-glm(GDD10c ~ seed_setting , data = central_american_hypo, family = gaussian)  
summary(md_32)
```

```
##  
## Call:
```



```

## glm(formula = GDD10c ~ seed_setting, family = gaussian, data = central_american_hypo)
##
## Deviance Residuals:
##      Min       1Q   Median       3Q      Max
## -205.06   -38.17    24.04    37.54   161.98
##
## Coefficients:
##              Estimate Std. Error t value Pr(>|t|)
## (Intercept)    1089.41      16.63  65.528 < 2e-16 ***
## seed_setting1  -253.94      32.19  -7.888 1.36e-08 ***
## ---
## Signif. codes:  0 '***' 0.001 '**' 0.01 '*' 0.05 '.' 0.1 ' ' 1
##
## (Dispersion parameter for gaussian family taken to be 6080.627)
##
##      Null deviance: 548580  on 29  degrees of freedom
## Residual deviance: 170258  on 28  degrees of freedom
## (2 observations deleted due to missingness)
## AIC: 350.45
##
## Number of Fisher Scoring iterations: 2

```

```

lrtest(md_32)

```

```

## Likelihood ratio test
##
## Model 1: GDD10c ~ seed_setting
## Model 2: GDD10c ~ 1
##   #Df LogLik Df  Chisq Pr(>Chisq)
## 1    3 -172.23
## 2    2 -189.78 -1 35.101  3.131e-09 ***
## ---
## Signif. codes:  0 '***' 0.001 '**' 0.01 '*' 0.05 '.' 0.1 ' ' 1

```

```

lsmeans_ss_GDD10c <- LSD.test(md_32, "seed_setting", p.adj="none" )
lsmeans_ss_GDD10c

```

```

## $statistics
##      MSerror Df      Mean      CV
##    6080.627 28 1021.693 7.632268
##
## $parameters
##      test p.adjusted      name.t ntr alpha
## Fisher-LSD      none seed_setting  2  0.05
##
## $means
##      GDD10c      std r      LCL      UCL      Min      Max      Q25      Q50
## 0 1089.4114 75.78639 22 1055.3565 1123.4662 884.35 1196.15 1063.8000 1113.450
## 1  835.4688 84.21270  8  778.9952  891.9423 719.35  997.45  792.5875  817.225
##      Q75
## 0 1126.9500
## 1  875.3875
##
## $comparison
## NULL

```

```
##
## $groups
##      GDD10c groups
## 0 1089.4114      a
## 1  835.4688      b
##
## attr(,"class")
## [1] "group"
table(central_american_hypo$seed_setting)
```

```
##
##  0  1
## 24  8
table(central_american_hypo$seed_setting)
```

```
##
##  0  1
## 24  8
```

## Climatic & Geographical Variables

### A. Temperature

Distribution of the data.

```
ggdensity(central_american_hypo$temp,
  main = "Density plot of temperature",
  xlab = "Temperature yearly average")
```

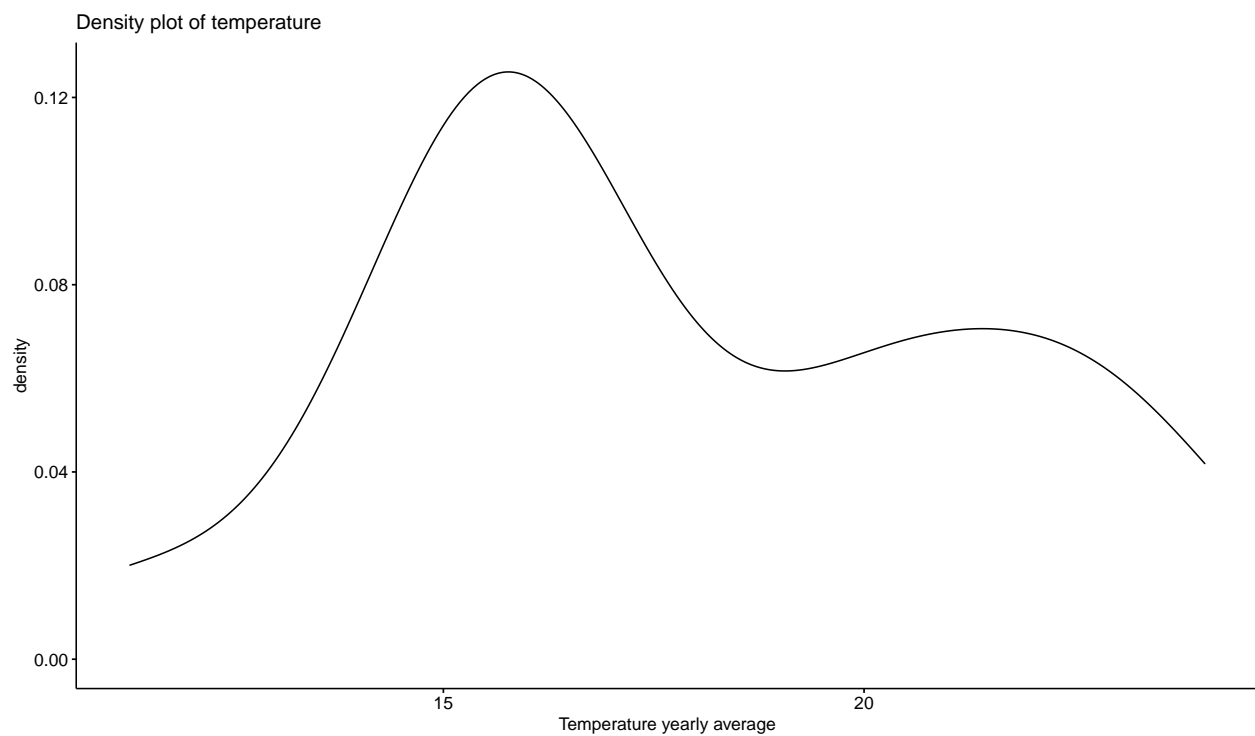

```
ggplot(data = central_american_hypo, mapping = aes(x = seed_setting, y = temp)) +
  geom_boxplot(outlier.size = -1)+geom_jitter(position=position_jitter(0.2), size=0.4)
```

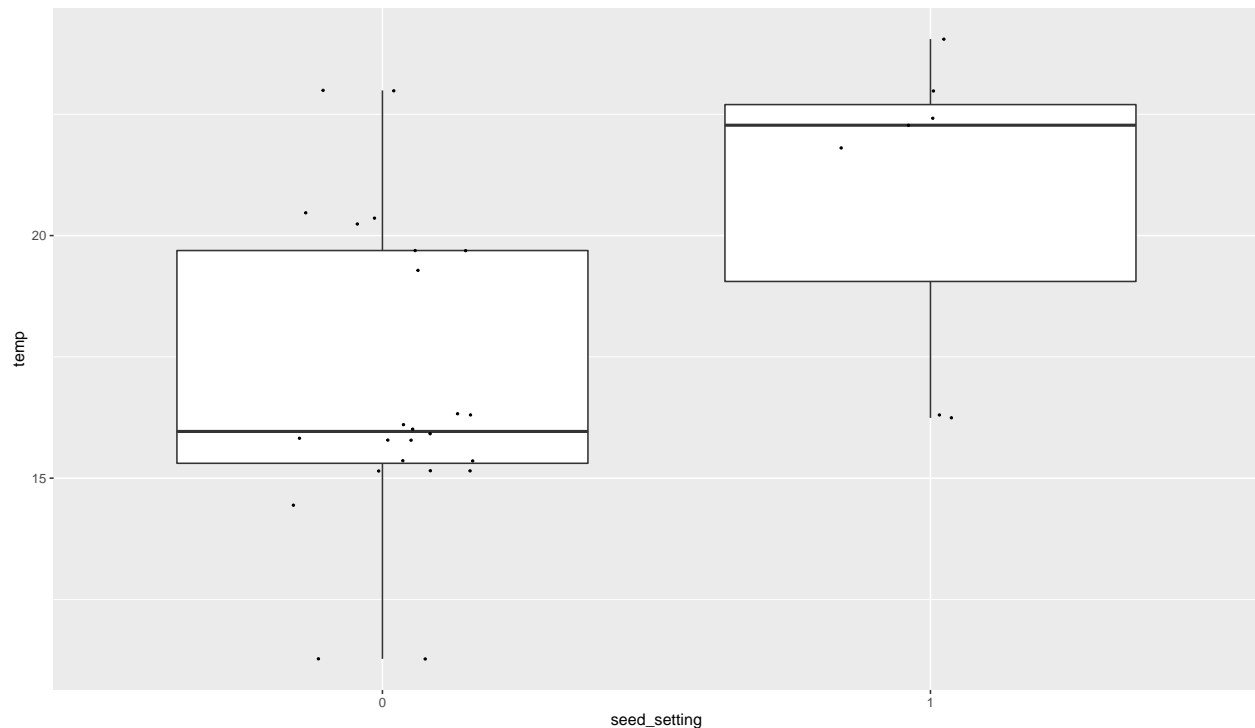

```
md_33 <-glm(temp ~ seed_setting , data = central_american_hypo, family = gaussian)
summary(md_33)
```

```
##
## Call:
## glm(formula = temp ~ seed_setting, family = gaussian, data = central_american_hypo)
##
## Deviance Residuals:
##      Min       1Q   Median       3Q      Max
## -5.6795  -1.7003  -0.8545   2.5330   6.0372
##
## Coefficients:
##              Estimate Std. Error t value Pr(>|t|)
## (Intercept)    16.954     0.638  26.575  <2e-16 ***
## seed_setting1     3.913     1.343   2.915  0.0068 **
## ---
## Signif. codes:  0 '***' 0.001 '**' 0.01 '*' 0.05 '.' 0.1 ' ' 1
##
## (Dispersion parameter for gaussian family taken to be 9.76891)
##
##      Null deviance: 366.29  on 30  degrees of freedom
## Residual deviance: 283.30  on 29  degrees of freedom
## (1 observation deleted due to missingness)
## AIC: 162.56
##
## Number of Fisher Scoring iterations: 2
```

```

lrtest(md_33)

## Likelihood ratio test
##
## Model 1: temp ~ seed_setting
## Model 2: temp ~ 1
##   #Df LogLik Df  Chisq Pr(>Chisq)
## 1    3 -78.281
## 2    2 -82.263 -1  7.9648   0.00477 **
## ---
## Signif. codes:  0 '***' 0.001 '**' 0.01 '*' 0.05 '.' 0.1 ' ' 1

lsmeans_ss_temp <- LSD.test(md_33, "seed_setting", p.adj="none" )
lsmeans_ss_temp

## $statistics
##      MSerror Df      Mean      CV
##    9.76891 29 17.83817 17.52156
##
## $parameters
##      test p.adjusted      name.t ntr alpha
## Fisher-LSD      none seed_setting  2  0.05
##
## $means
##      temp      std  r      LCL      UCL      Min      Max      Q25      Q50
## 0 16.95451 3.100959 24 15.64967 18.25936 11.27500 22.99167 15.30625 15.9625
## 1 20.86786 3.217960  7 18.45175 23.28396 16.24167 24.05000 19.05417 22.2750
##      Q75
## 0 19.69167
## 1 22.70000
##
## $comparison
## NULL
##
## $groups
##      temp groups
## 1 20.86786      a
## 0 16.95451      b
##
## attr("class")
## [1] "group"

```

## B. Precipitation

```

ggdensity(central_american_hypo$prec,
  main = "Density plot of precipitation",
  xlab = "Precipitation yearly average")

```

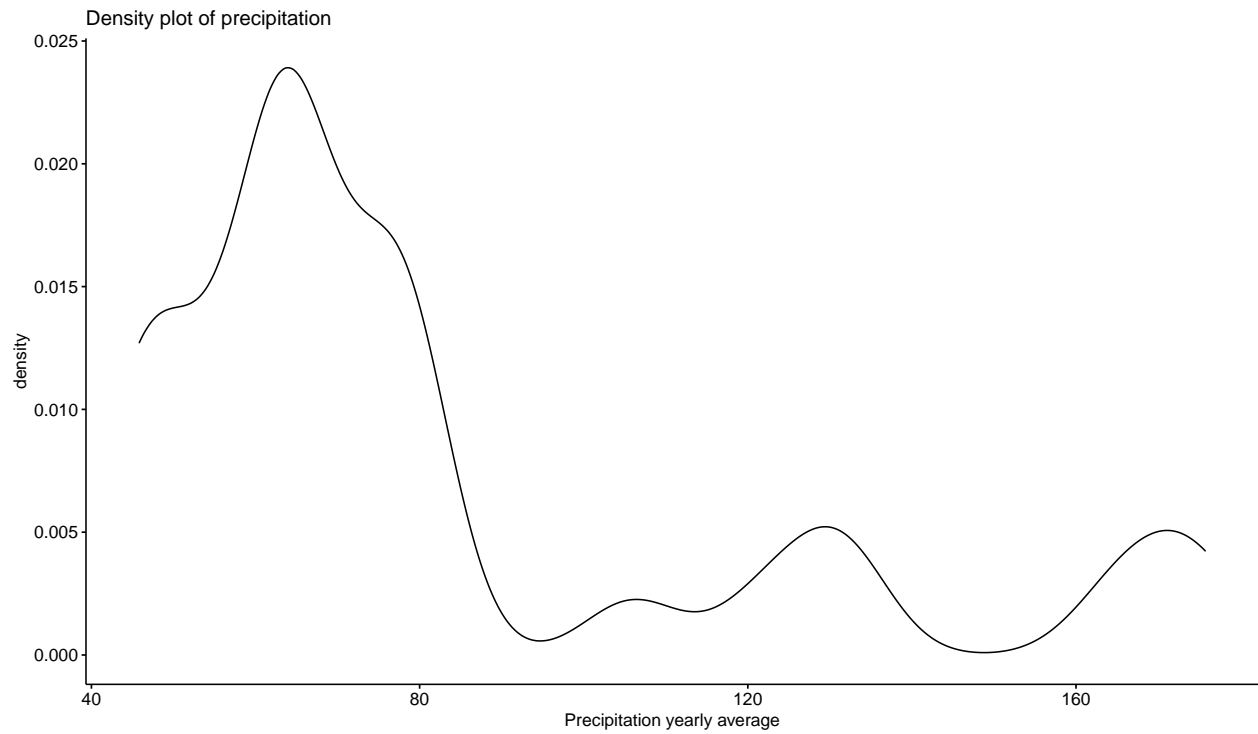

```
ggplot(data = central_american_hypo, mapping = aes(x = seed_setting, y = prec)) +
  geom_boxplot(outlier.size = -1)+geom_jitter(position=position_jitter(0.2), size=0.4)
```

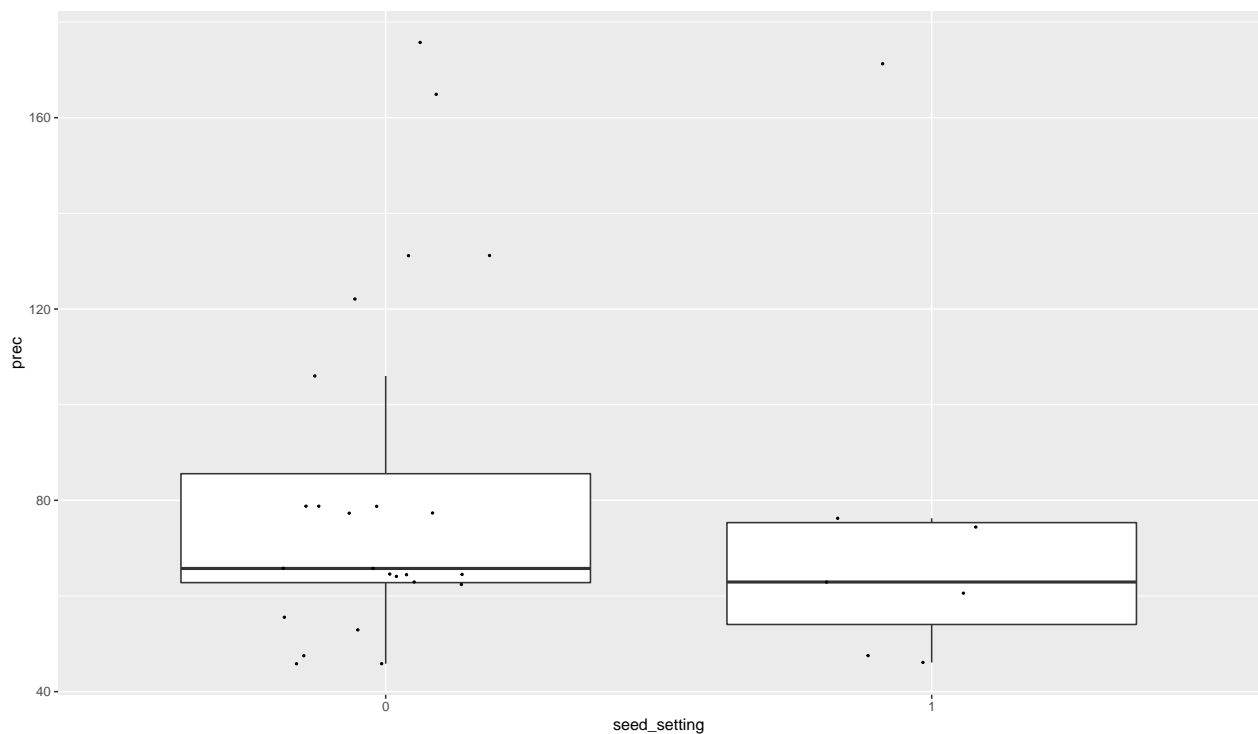

```
md_34 <-glm(prec ~ seed_setting , data = central_american_hypo, family = gaussian)
summary(md_34)
```

```
##
## Call:
```

```
## glm(formula = prec ~ seed_setting, family = gaussian, data = central_american_hypo)
##
## Deviance Residuals:
##      Min       1Q   Median       3Q      Max
## -36.837  -20.003  -16.417   -1.667   94.250
##
## Coefficients:
##              Estimate Std. Error t value Pr(>|t|)
## (Intercept)      82.670       7.749  10.668 1.49e-11 ***
## seed_setting1    -5.670      16.308  -0.348   0.731
## ---
## Signif. codes:  0 '***' 0.001 '**' 0.01 '*' 0.05 '.' 0.1 ' ' 1
##
## (Dispersion parameter for gaussian family taken to be 1441.238)
##
##      Null deviance: 41970  on 30  degrees of freedom
## Residual deviance: 41796  on 29  degrees of freedom
## (1 observation deleted due to missingness)
## AIC: 317.38
##
## Number of Fisher Scoring iterations: 2
```

```
lrtest(md_34)
```

```
## Likelihood ratio test
##
## Model 1: prec ~ seed_setting
## Model 2: prec ~ 1
##   #Df LogLik Df Chisq Pr(>Chisq)
## 1    3 -155.69
## 2    2 -155.75 -1 0.129      0.7195
```

```
lsmeans_ss_prec <- LSD.test(md_34, "seed_setting", p.adj="none" )
lsmeans_ss_prec
```

```
## $statistics
##      MSerror Df      Mean      CV
## 1441.238 29 81.38978 46.64423
##
## $parameters
##      test p.adjusted      name.t ntr alpha
## Fisher-LSD      none seed_setting  2 0.05
##
## $means
##      prec      std r      LCL      UCL      Min      Max      Q25      Q50
## 0 82.67014 36.48207 24 66.82105 98.51923 45.83333 175.75 62.79167 65.75000
## 1 77.00000 43.17452  7 47.65319 106.34681 46.08333 171.25 54.04167 62.91667
##      Q75
## 0 85.56250
## 1 75.33333
##
## $comparison
## NULL
##
## $groups
```

```
##      prec groups
## 0 82.67014      a
## 1 77.00000      a
##
## attr("class")
## [1] "group"
```

### C. Solar Radiation

```
ggdensity(central_american_hypo$sr,
  main = "Density plot of SR",
  xlab = "Solar Radiation yearly average")
```

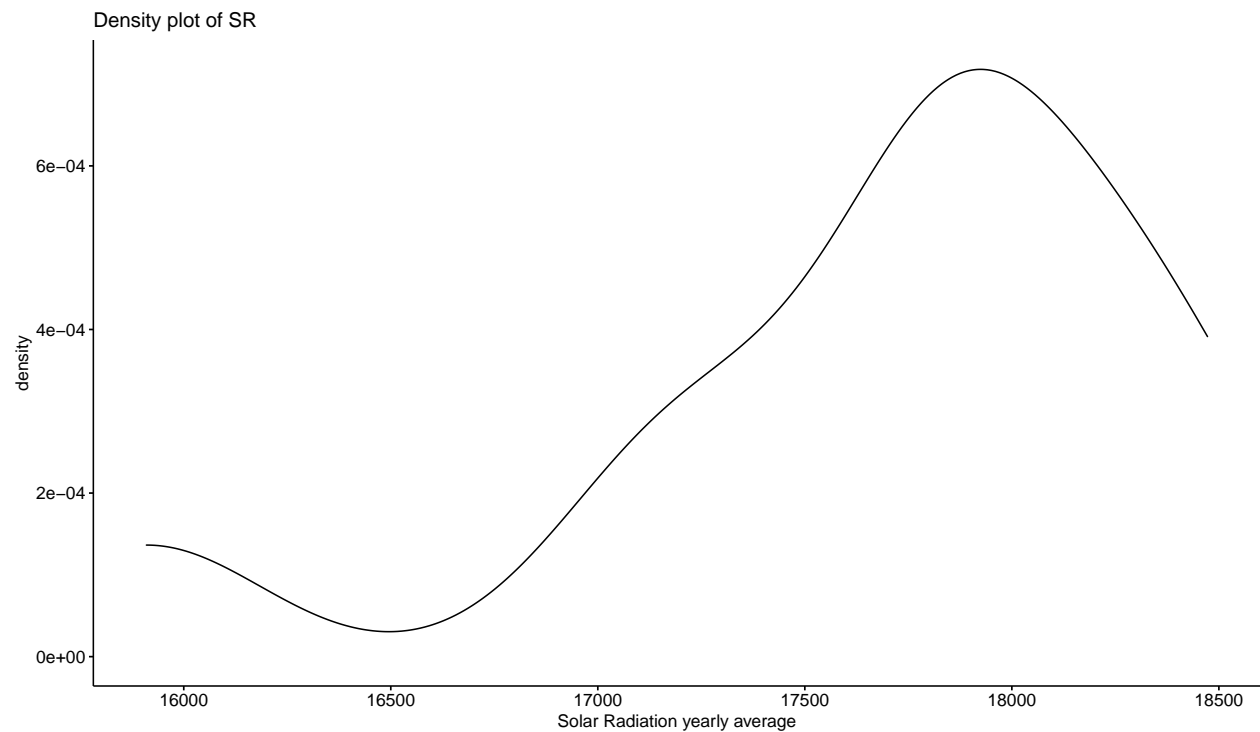

```
ggplot(data = central_american_hypo, mapping = aes(x = seed_setting, y = sr)) +
  geom_boxplot(outlier.size = -1)+geom_jitter(position=position_jitter(0.2), size=0.4)
```

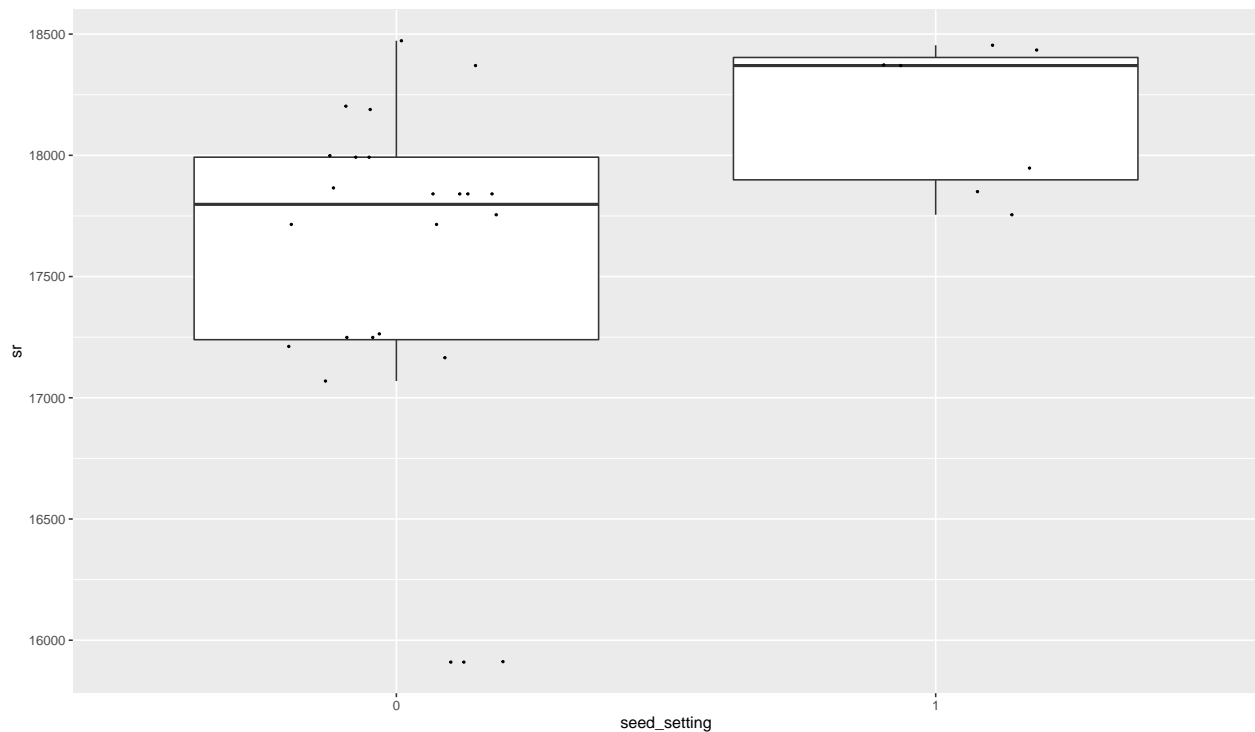

```
md_35 <-glm(sr ~ seed_setting , data = central_american_hypo, family = gaussian)
summary(md_35)
```

```
##
## Call:
## glm(formula = sr ~ seed_setting, family = gaussian, data = central_american_hypo)
##
## Deviance Residuals:
##      Min       1Q   Median       3Q      Max
## -1614.0   -293.4    203.7    329.5    948.8
##
## Coefficients:
##              Estimate Std. Error t value Pr(>|t|)
## (Intercept)   17523.7     135.9 128.984  <2e-16 ***
## seed_setting1    645.4     285.9   2.257   0.0317 *
## ---
## Signif. codes:  0 '***' 0.001 '**' 0.01 '*' 0.05 '.' 0.1 ' ' 1
##
## (Dispersion parameter for gaussian family taken to be 442986.6)
##
##      Null deviance: 15104019  on 30  degrees of freedom
## Residual deviance: 12846612  on 29  degrees of freedom
## (1 observation deleted due to missingness)
## AIC: 494.95
##
## Number of Fisher Scoring iterations: 2
```

```
lrtest(md_35)
```

```
## Likelihood ratio test
##
## Model 1: sr ~ seed_setting
```



```
## Model 2: sr ~ 1
##   #Df LogLik Df  Chisq Pr(>Chisq)
## 1    3 -244.47
## 2    2 -246.98 -1 5.0183    0.02508 *
## ---
## Signif. codes:  0 '***' 0.001 '**' 0.01 '*' 0.05 '.' 0.1 ' ' 1

lsmeans_ss_sr <- LSD.test(md_35, "seed_setting", p.adj="none" )
lsmeans_ss_sr

## $statistics
##      MSerror Df      Mean      CV
## 442986.6 29 17669.48 3.766792
##
## $parameters
##      test p.adjusted      name.t ntr alpha
## Fisher-LSD      none seed_setting  2 0.05
##
## $means
##      sr      std r      LCL      UCL      Min      Max      Q25      Q50
## 0 17523.74 731.0134 24 17245.88 17801.60 15909.75 18472.5 17239.65 17797.79
## 1 18169.14 304.3731  7 17654.64 18683.65 17754.83 18454.0 17898.88 18370.25
##      Q75
## 0 17992.25
## 1 18403.58
##
## $comparison
## NULL
##
## $groups
##      sr groups
## 1 18169.14    a
## 0 17523.74    b
##
## attr(,"class")
## [1] "group"
```

#### D. Elevation

```
ggdensity(central_american_hypo$elevation,
           main = "Density plot of elevation",
           xlab = "Elavations of the genotypes country of origin")
```

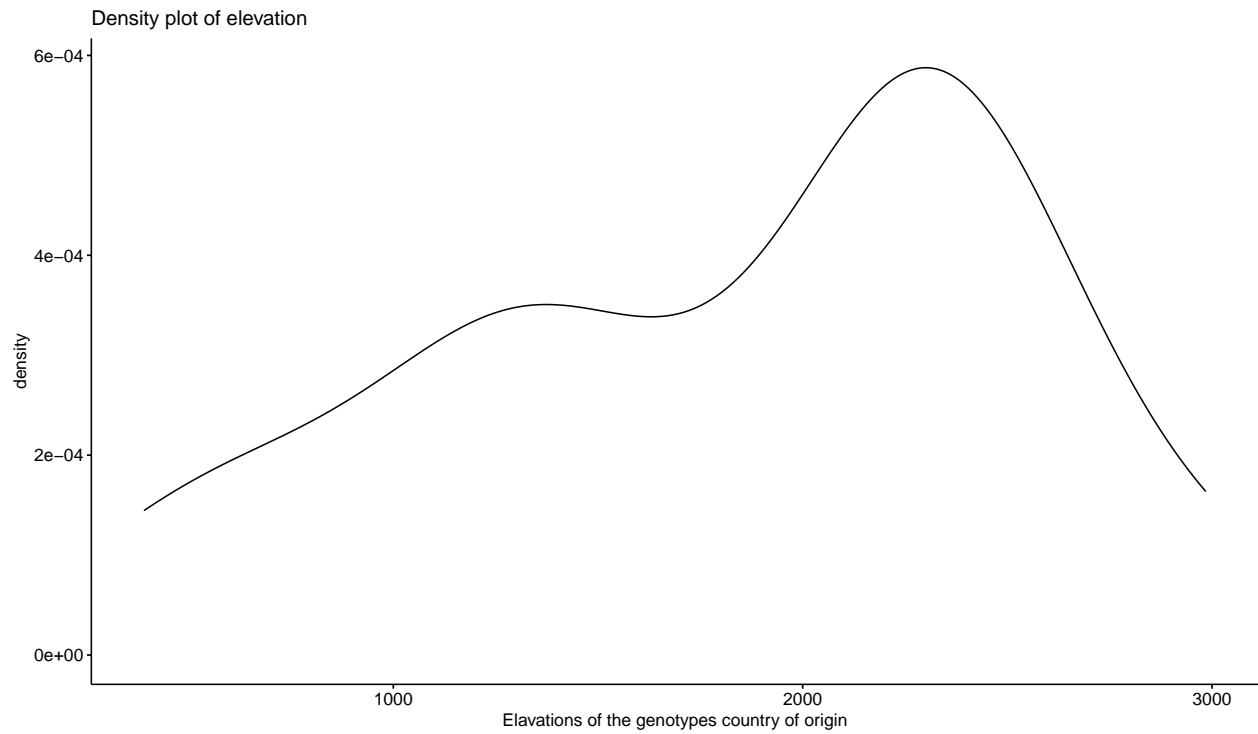

```
ggplot(data = central_american_hypo, mapping = aes(x = seed_setting, y = elevation)) +  
  geom_boxplot(outlier.size = -1)+geom_jitter(position=position_jitter(0.2), size=0.4)
```

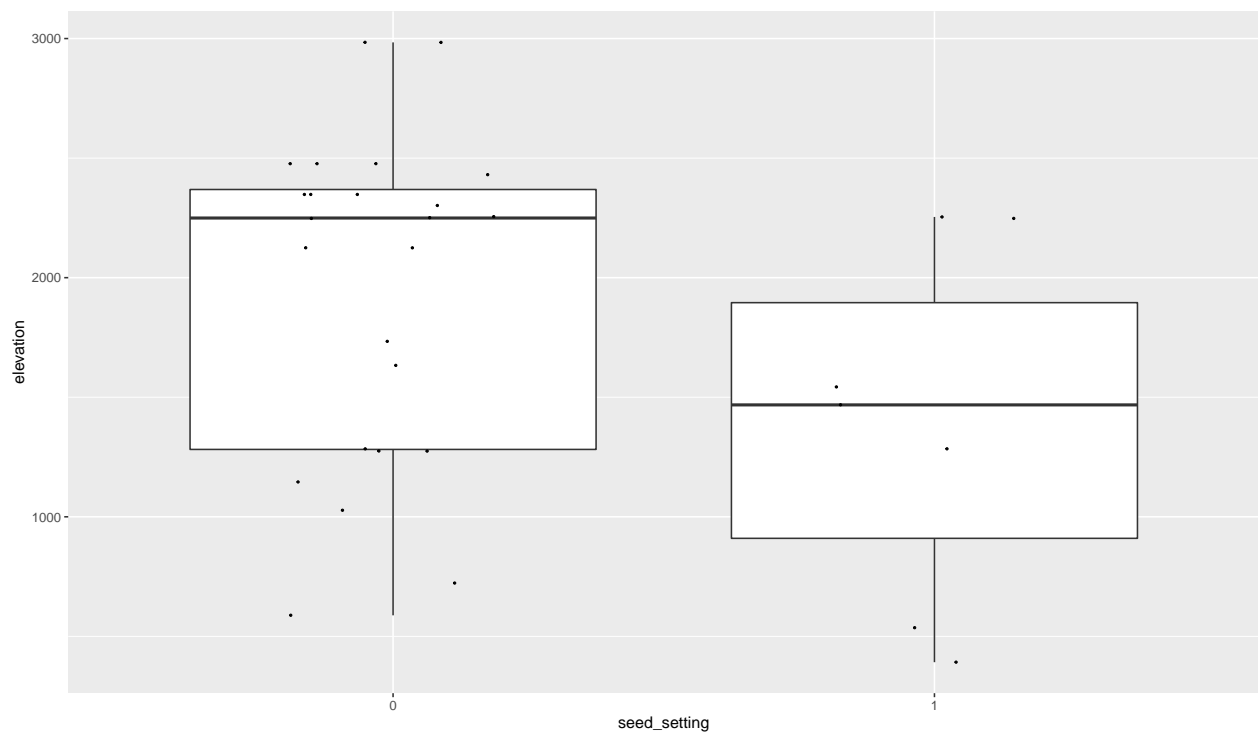

```
md_36 <-glm(elevation ~ seed_setting , data = central_american_hypo, family = gaussian)  
summary(md_36)
```

```
##  
## Call:
```

```

## glm(formula = elevation ~ seed_setting, family = gaussian, data = central_american_hypo)
##
## Deviance Residuals:
##      Min       1Q   Median       3Q      Max
## -1364.7   -673.2    172.3    436.8   1031.3
##
## Coefficients:
##              Estimate Std. Error t value Pr(>|t|)
## (Intercept)    1952.7      140.5  13.895 2.38e-14 ***
## seed_setting1   -563.4      295.7   -1.905  0.0667 .
## ---
## Signif. codes:  0 '***' 0.001 '**' 0.01 '*' 0.05 '.' 0.1 ' ' 1
##
## (Dispersion parameter for gaussian family taken to be 473967.4)
##
##      Null deviance: 15465402  on 30  degrees of freedom
## Residual deviance: 13745054  on 29  degrees of freedom
## (1 observation deleted due to missingness)
## AIC: 497.04
##
## Number of Fisher Scoring iterations: 2

```

```

lrtest(md_36)

```

```

## Likelihood ratio test
##
## Model 1: elevation ~ seed_setting
## Model 2: elevation ~ 1
##   #Df LogLik Df  Chisq Pr(>Chisq)
## 1    3 -245.52
## 2    2 -247.35 -1  3.6557    0.05588 .
## ---
## Signif. codes:  0 '***' 0.001 '**' 0.01 '*' 0.05 '.' 0.1 ' ' 1

```

```

lsmeans_ss_elevation <- LSD.test(md_36, "seed_setting", p.adj="none" )
lsmeans_ss_elevation

```

```

## $statistics
##      MSerror Df      Mean      CV
##  473967.4 29 1825.484 37.71345
##
## $parameters
##      test p.adjusted      name.t ntr alpha
## Fisher-LSD      none seed_setting  2  0.05
##
## $means
##      elevation      std r      LCL      UCL Min Max      Q25      Q50      Q75
## 0  1952.708 675.5464 24 1665.292 2240.124 588 2984 1281.75 2249.5 2368.75
## 1  1389.286 735.8335  7  857.095 1921.476 392 2254  910.00 1468.0 1895.50
##
## $comparison
## NULL
##
## $groups
##      elevation groups

```

```
## 0 1952.708      a
## 1 1389.286      a
##
## attr(,"class")
## [1] "group"
```

## E. Latitude

```
ggsdensity(central_american$latitude,
  main = "Density plot of latitude",
  xlab = "Latitudess of the genotypes country of origin")
```

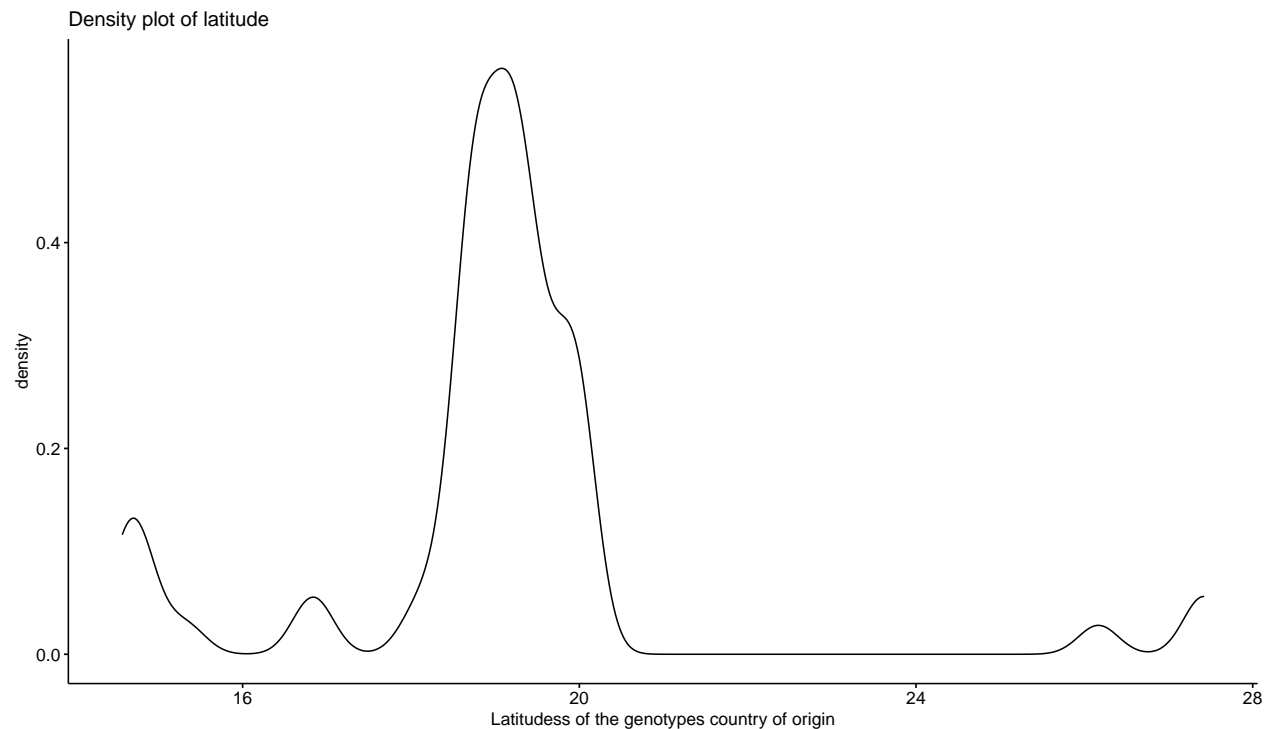

```
ggplot(data = central_american_hypo, mapping = aes(x = seed_setting, y = latitude)) +
  geom_boxplot(outlier.size = -1)+geom_jitter(position=position_jitter(0.2), size=0.4)
```

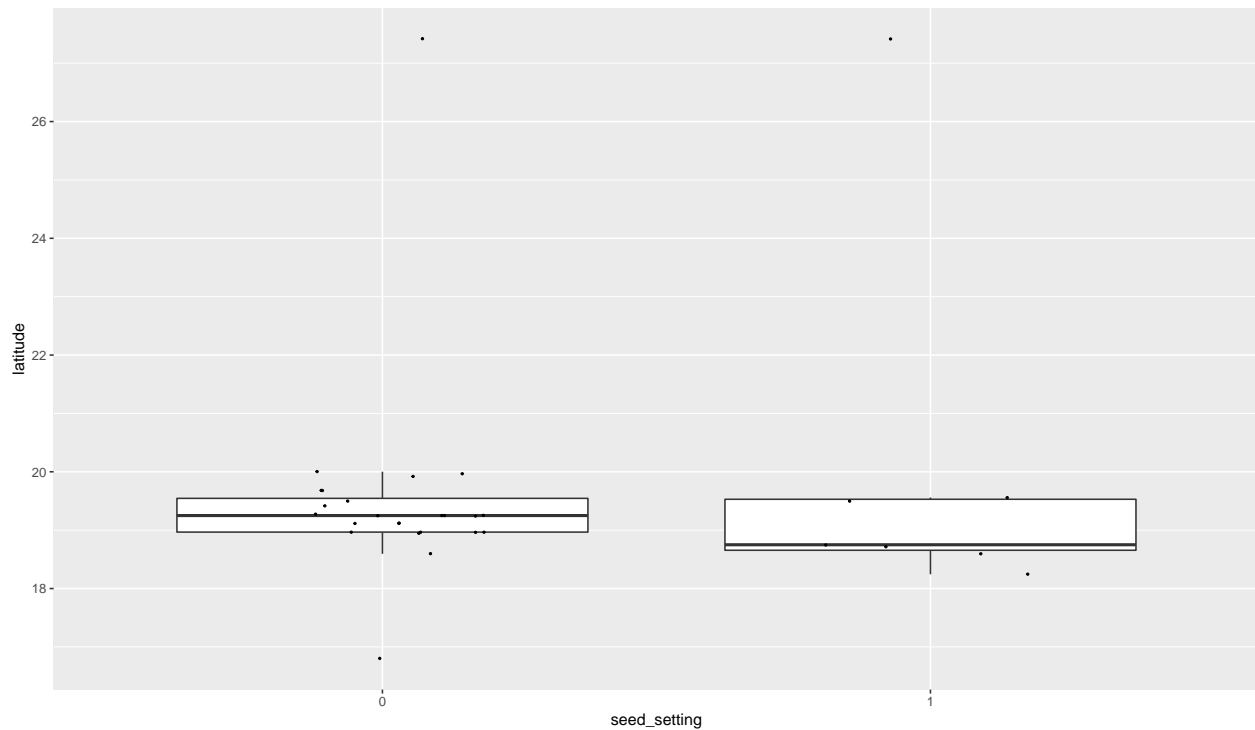

```
md_37 <-glm(latitude ~ seed_setting , data = central_american_hypo, family = gaussian)
summary(md_37)
```

```
##
## Call:
## glm(formula = latitude ~ seed_setting, family = gaussian, data = central_american_hypo)
##
## Deviance Residuals:
##      Min       1Q   Median       3Q      Max
## -2.7273  -0.5689  -0.4106  -0.0696   7.8894
##
## Coefficients:
##              Estimate Std. Error t value Pr(>|t|)
## (Intercept)    19.5273     0.4443  43.955  <2e-16 ***
## seed_setting1     0.5842     0.9349   0.625   0.537
## ---
## Signif. codes:  0 '***' 0.001 '**' 0.01 '*' 0.05 '.' 0.1 ' ' 1
##
## (Dispersion parameter for gaussian family taken to be 4.736805)
##
##      Null deviance: 139.22  on 30  degrees of freedom
## Residual deviance: 137.37  on 29  degrees of freedom
## (1 observation deleted due to missingness)
## AIC: 140.12
##
## Number of Fisher Scoring iterations: 2
lrtest(md_37)
```

```
## Likelihood ratio test
##
## Model 1: latitude ~ seed_setting
```

```
## Model 2: latitude ~ 1
##   #Df LogLik Df   Chisq Pr(>Chisq)
## 1    3 -67.062
## 2    2 -67.269 -1 0.4145      0.5197

lsmeans_ss_latitude <- LSD.test(md_37, "seed_setting", p.adj="none" )
lsmeans_ss_latitude

## $statistics
##   MSerror Df      Mean      CV
## 4.736805 29 19.65918 11.07075
##
## $parameters
##      test p.adjusted      name.t ntr alpha
## Fisher-LSD      none seed_setting  2 0.05
##
## $means
##   latitude      std r      LCL      UCL      Min      Max      Q25      Q50
## 0 19.52728 1.790484 24 18.61867 20.43589 16.80000 27.41667 18.96667 19.25
## 1 20.11143 3.256613  7 18.42901 21.79386 18.24419 27.41667 18.65561 18.75
##      Q75
## 0 19.54487
## 1 19.52898
##
## $comparison
## NULL
##
## $groups
##   latitude groups
## 1 20.11143      a
## 0 19.52728      a
##
## attr(,"class")
## [1] "group"
```

## F. Longitude

```
ggdensity(central_american_hypo$longitude,
           main = "Density plot of longitude",
           xlab = "Longitudes of the genotypes country of origin")
```

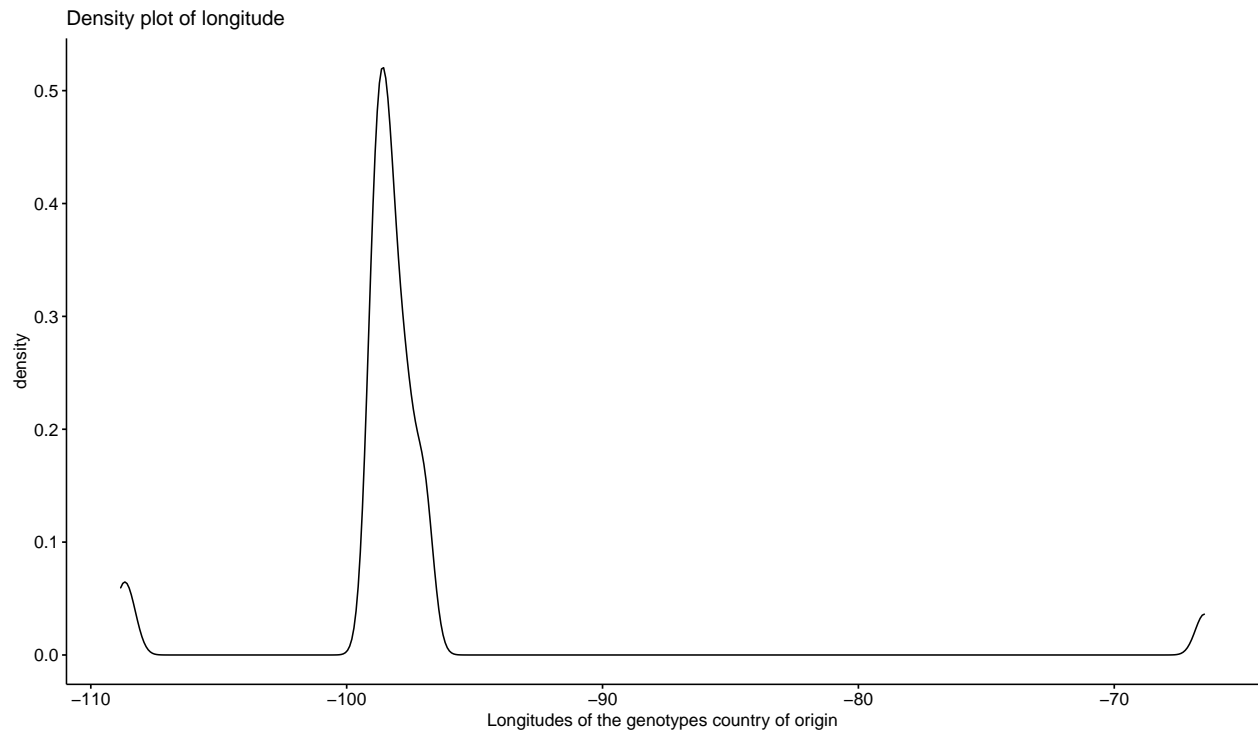

```
ggplot(data = central_american_hypo, mapping = aes(x = seed_setting, y = longitude)) +
  geom_boxplot(outlier.size = -1)+geom_jitter(position=position_jitter(0.2), size=0.4)
```

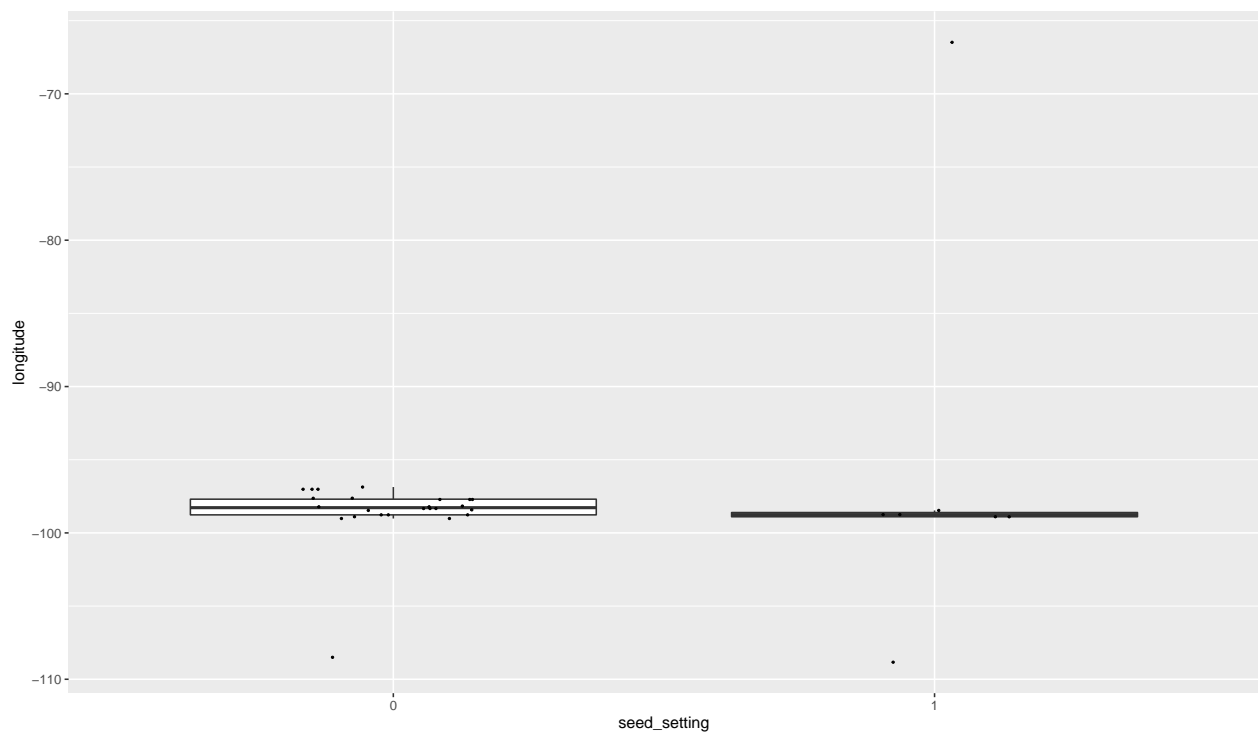

```
md_38 <-glm(longitude ~ seed_setting , data = central_american_hypo, family = gaussian)
summary(md_38)
```

```
##
## Call:
```

```

## glm(formula = longitude ~ seed_setting, family = gaussian, data = central_american_hypo)
##
## Deviance Residuals:
##      Min       1Q   Median       3Q      Max
## -13.2520   -0.4940    0.1886    0.8060   29.1024
##
## Coefficients:
##              Estimate Std. Error t value Pr(>|t|)
## (Intercept)   -98.523      1.306  -75.45  <2e-16 ***
## seed_setting1    2.941      2.748    1.07   0.293
## ---
## Signif. codes:  0 '***' 0.001 '**' 0.01 '*' 0.05 '.' 0.1 ' ' 1
##
## (Dispersion parameter for gaussian family taken to be 40.92449)
##
##      Null deviance: 1233.7  on 30  degrees of freedom
## Residual deviance: 1186.8  on 29  degrees of freedom
## (1 observation deleted due to missingness)
## AIC: 206.97
##
## Number of Fisher Scoring iterations: 2

```

```

lrtest(md_38)

```

```

## Likelihood ratio test
##
## Model 1: longitude ~ seed_setting
## Model 2: longitude ~ 1
##   #Df LogLik Df  Chisq Pr(>Chisq)
## 1    3 -100.48
## 2    2 -101.09 -1 1.2011    0.2731

```

```

lsmeans_ss_longitude <- LSD.test(md_38, "seed_setting", p.adj="none" )
lsmeans_ss_longitude

```

```

## $statistics
##      MSerror Df      Mean      CV
## 40.92449 29 -97.85852 -6.537218
##
## $parameters
##      test p.adjusted      name.t ntr alpha
## Fisher-LSD      none seed_setting  2 0.05
##
## $means
## longitude      std r      LCL      UCL      Min      Max      Q25
## 0 -98.52271  2.225085 24 -101.1934 -95.85199 -108.5000 -96.86667 -98.76667
## 1 -95.58131 13.372465  7 -100.5265 -90.63610 -108.8333 -66.47890 -98.89611
##      Q50      Q75
## 0 -98.275 -97.69583
## 1 -98.750 -98.60734
##
## $comparison
## NULL
##
## $groups

```



```
##    longitude groups
## 1 -95.58131      a
## 0 -98.52271      a
##
## attr(,"class")
## [1] "group"
```
